# Supplementary material for: A reproducible approach to high-throughput biological data acquisition and integration
Source: PeerJ. 2015 Mar 31;3:e791. doi: 10.7717/peerj.791 (PMC4493686; doi:10.7717/peerj.791)
Supplement: Table S1 — We screened ARepA’s GEO metadata database for human prostate cancer and prostate tissue conditions matching “prostate cancer” in human gene expression profile studies with at least six samples each, identifying ten relevant datasets from six different platforms (Affymetrix, Agilent, and CNIO). [file peerj-03-791-s002.xlsx]

## Sheet: SupplementaryTableS1
Supplementary Table 1: A set of ten human prostate cancer specific gene expression datasets from GEO. We screened ARepA’s GEO metadata database for human prostate cancer and prostate tissue conditions matching “prostate cancer” in human gene expression profile studies with at least six samples each, identifying ten relevant datasets from six different platforms (Affymetrix, Agilent, and CNIO).
GEO Accession number	Platform	Manufacturer	Description
GSE12348	GPL96	Affymetrix	Prostate cancer cell lines and normal prostate epithelial and stromal cells in primary culture
GSE14206	GPL887	Agilent	Analysis of ETS gene expression patterns uncovers novel ETS mediated gene silencing pathways in prostate cancers
GSE2443	GPL96	Affymetrix	Prostate cancer - comparison of androgen-dependent and -independent microdissected primary tumor
GSE3868	GPL96	Affymetrix	Gene profiling of primary cultures from human prostate tumors
GSE5377	GPL201	Affymetrix	Gene expression profiling of hormone resistant prostate cancer
GSE6956	GPL571	Affymetrix	Tumor Immunobiological Differences in Prostate Cancer between African-American and European-American Men
GSE7930	GPL96	Affymetrix	Protein 4.1B suppresses prostate cancer progression and metastasis
GSE8218	GPL96	Affymetrix	Gene expression data from prostate cancer samples
GSE8511	GPL1708	Agilent	Profiling of prostate tissues in prostate cancer progression
GSE9347	GPL1998	CNIO	Gene expression profiling of prostate cancer
