# Supplementary material for: A reproducible approach to high-throughput biological data acquisition and integration
Source: PeerJ. 2015 Mar 31;3:e791. doi: 10.7717/peerj.791 (PMC4493686; doi:10.7717/peerj.791)
Supplement: Table S3 — We conducted a differential expression meta-analysis of genes and pathways up- or down-regulated in the germ-free murine gut (Figure S1), using six case-control datasets (Table S2). We first computed differential expression for all genes between germ-free gut and wild type gut within each dataset using the R/limma package. Next, we performed a meta-analysis using the R/metafor package on these six datasets by applying a random-effects model on the fold changes, fitting the model with the restricted maximum-likelihood estimator (REML). We finally tested all genes and their resulting meta-p-values for gene set enrichment in KEGG and BioCarta pathways which are shown in this table. [file peerj-03-791-s004.xlsx]

## Sheet: Supplementary Table S3
Supplementary Table 3: Enriched pathways from a meta-analysis of murine gene expression datasets from germ-free vs wild type intestinal tissue. We conducted a differential expression meta-analysis of genes and pathways up- or down-regulated in the germ-free murine gut (Supplementary Figure 1), using six case-control datasets (Supplementary Table 2). We first computed differential expression for a…
	NOM p-val	FDR q-val	Context	Description
Enriched pathways for upregulated gene sets
KEGG PPAR signaling pathway	0	0.0395815	Catabolism	Peroxisome proliferator-activated receptors (PPARs) are nuclear hormone receptors that are activated by fatty acids and their derivatives. PPAR has three subtypes (PPARalpha, beta/delta, and gamma) showing different expression patterns in vertebrates. Each of them is encoded in a separate gene and binds fatty acids and eicosanoids. PPARalpha plays a role in the clearance of circulating or cellula…
KEGG Peroxisome	0.00368324	0.0864777	Catabolism	Peroxisomes are essential organelles that play a key role in redox signalling and lipid homeostasis. They contribute to many crucial metabolic processes such as fatty acid oxidation, biosynthesis of ether lipids and free radical detoxification. The biogenesis of peroxisomes starts with the early peroxins PEX3, PEX16 and PEX19 and proceeds via several steps. The import of membrane proteins into pe…
Enriched pathways for downregulated gene sets
KEGG Linoleic acid metabolism	0	0.0509391	Catabolism
BIOCARTA CTL mediated immune response against target cells	0	0.0808735	Immunity	Cytotoxic T lymphocytes (CTLs), also known as killer T cells, provide a cell-mediated response to specific foreign antigens associated with cells. CTLs only respond to foreign antigen when it is presented bound to the MHC-1 expressed on the surface of all cells. CTLs do not respond to soluble antigen, but induce apoptosis in viral-infected cells and in cancer cells. When the complex of antigen bo…
BIOCARTA T Cytotoxic Cell Surface Molecules	0	0.099587	Immunity	Cytotoxic T cells are a key part of the cellular immune response, killing cells that display foreign antigen on their surface, primarily virus-infected cells. Transformed cells can also be detected and eliminated by cytotoxic T cells. There are two mechanisms by which activated cytotoxic T cells kill cells presenting specific antigen. One method involves the release of secretory granules containi…
KEGG Glycosphingolipid biosynthesis - lacto and neolacto series	0.00911162	0.162141	Catabolism
BIOCARTA T Helper Cell Surface Molecules	0.014433	0.181881	Immunity	T helper cells play an essential role coordinating the activities of other parts of the immune system, including B cells, cytotoxic T cells, macrophages and other cells. The crucial nature of helper T cells in the normal immune response is demonstrated by the severe immune deficiency associated with the HIV-induced helper T cell depletion. To communicate with other cells, helper T cells express a…
BIOCARTA D4-GDI Signaling Pathway	0.00656455	0.187747	Apoptosis	D4-GDI (GDP dissociation inhibitor) is a negative regulator of the ras related Rho Family of GTPases. Since the rho GTPases promote cytoskeletal and membrane changes associated with apoptotic cell death, the removal of the D4-GDI block through its cleavage is important for inducing apoptosis. Caspase-3 cleaves the 28 kDa mature form of D4-GDI to give a 5 kDa and 23 kDa Size fragment. The 23 kDa f…
BIOCARTA Granzyme A mediated Apoptosis Pathway	0.006	0.188406	Immunity	One mechanism used by cytotoxic T cells to kill tumor cells and virus-infected cells is the release of perforin and granzyme proteins. Perforin proteins form pores in the membranes of the attacked cell, allowing the entry of Granzyme A and Granzyme B. Granzyme B induces caspase activation and cleavage of factors like ICAD, releasing DFF40 to fragment DNA, one of the hallmarks of apoptotic cell de…
KEGG DNA replication	0.00639659	0.213628	DNA replication	A complex network of interacting proteins and enzymes is required for DNA replication. Generally, DNA replication follows a multistep enzymatic pathway. At the DNA replication fork, a DNA helicase (DnaB or MCM complex) precedes the DNA synthetic machinery and unwinds the duplex parental DNA in cooperation with the SSB or RPA. On the leading strand, replication occurs continuously in a 5 to 3 dire…
KEGG B cell receptor signaling pathway	0.00867679	0.219821	Immunity	B cells are an important component of adaptive immunity. They produce and secrete millions of different antibody molecules, each of which recognizes a different (foreign) antigen. The B cell receptor (BCR) is an integral membrane protein complex that is composed of two immunoglobulin (Ig) heavy chains, two Ig light chains and two heterodimers of Ig-alpha and Ig-beta. After BCR ligation by antigen…
KEGG Systemic lupus erythematosus	0.0339703	0.22071	Immunity	Systemic lupus erythematosus (SLE) is characterized by circulating IgG autoantibodies that are specific for self-antigens, such as DNA, nuclear proteins and certain cytoplasmic components. Immune complexes comprising autoantibody and self-antigen is deposited particulary in the renal glomeruli and mediate a systemic inflammatory response by activating complement or via Fc-gamma-R-mediated neutrop…
KEGG Cell adhesion molecules (CAMs)	0.00229885	0.231191	Cell adhesion	Cell adhesion molecules are (glyco)proteins expressed on the cell surface and play a critical role in a wide array of biologic processes that include hemostasis, the immune response, inflammation, embryogenesis, and development of neuronal tissue. There are four main groups: the integrin family, the immunoglobulin superfamily, selectins, and cadherins. Membrane proteins that mediate immune cellce…
KEGG Fc epsilon RI signaling pathway	0.0116009	0.232738	Immunity	Fc epsilon RI-mediated signaling pathways in mast cells are initiated by the interaction of antigen (Ag) with IgE bound to the extracellular domain of the alpha chain of Fc epsilon RI. The activation pathways are regulated both positively and negatively by the interactions of numerous signaling molecules. Mast cells that are thus activated release preformed granules which contain biogenic amines …
KEGG Leukocyte transendothelial migration	0	0.234335	Immunity	Leukocyte migaration from the blood into tissues is vital for immune surveillance and inflammation. During this diapedesis of leukocytes, the leukocytes bind to endothelial cell adhesion molecules (CAM) and then migrate across the vascular endothelium. A leukocyte adherent to CAMs on the endothelial cells moves forward by leading-edge protrusion and retraction of its tail. In this process, alphaL…
KEGG alpha-Linolenic acid metabolism	0.0400844	0.238881	Catabolism
BIOCARTA T Cell Receptor Signaling Pathway	0.004158	0.23917	Immunity	The T Cell Receptor plays a key role in the immune system. The specificity of the receptor is governed by the binding site formed from the mature alpha and beta chains (shown here) or gamma and delta chains in gamma/delta T Cells. It is the ability of this receptor to bind a complex of foreign peptide in the groove of an MHC molecule that leads to T cell activation. Upon activation the T cell can…
