# Supplementary material for: A reproducible approach to high-throughput biological data acquisition and integration
Source: PeerJ. 2015 Mar 31;3:e791. doi: 10.7717/peerj.791 (PMC4493686; doi:10.7717/peerj.791)
Supplement: Table S5 — We conducted a differential expression meta-analysis of genes and pathways up- or down-regulated in the germ-free murine gut (Figure S1), using six case-control datasets (Table S2). We first computed differential expression for all genes between germ-free gut and wild type gut within each dataset using the R/limma package. Next, we performed a meta-analysis using the R/metafor package on these six datasets by applying a random-effects model on the fold changes, fitting the model with the restricted maximum-likelihood estimator (REML). [file peerj-03-791-s006.xlsx]

## Sheet: Supplementary Table 5
Supplementary Table 5: Meta-analysis of murine gene expression datasets from germ-free vs wild type intestinal tissue. We conducted a differential expression meta-analysis of genes and pathways up- or down-regulated in the germ-free murine gut, using six case-control datasets (Supplementary Table 2). We first computed differential expression for all genes between germ-free gut and wild type gut w…
Gene	Gene name	GDS2968	GDS2163	GDS640	GSE13908	GSE17438	GSE22648	meta-analyzed estimate	meta-analyzed pvalue
UniRef100_P02798	Mt2	0.0103531	0.116773	0.0388105	0.0202715	4.03e-06	0.00373811	1.19687	2.86703e-46
UniRef100_P27784	Ccl6	0.903959	0.25419	0.562467	0.209094	1.1e-05	0.00200432	-0.481116	3.80021e-29
UniRef100_Q91XE4	Acy3	0.194491	0.363592	0.321523	0.180044	4.87e-05	0.00641958	0.455001	5.23591e-24
UniRef100_Q99LB4	Capg	0.171677	0.182834	0.133745	0.37099	0.000743517	0.000546878	-0.736585	4.49946e-22
UniRef100_Q9R0M5	Tpk1	0.562923	0.9817	0.96414	0.30056	0.000365681	0.000495741	0.43413	8.25744e-22
UniRef100_P97328	Khk	0.130215	0.462143	0.59914	0.943038	5.9e-05	0.0106057	0.443064	4.39337e-21
UniRef100_Q9DBP0	Slc34a2	0.0350539	0.198514	0.408886	0.913052	6.04e-05	0.0252146	0.831308	5.17056e-20
UniRef100_Q9Z0Y9	Nr1h3	0.19752	0.798193	0.0731318	0.521988	0.000197267	0.00366457	0.513643	6.72716e-20
UniRef100_P05627	Jun	0.121213	0.38119	0.256846	0.724568	0.000492437	0.00349728	-0.430752	1.44662e-18
UniRef100_Q99KP3	Cryl1	0.527596	0.829809	0.0638105	0.496507	0.00194637	0.00321611	0.355032	1.6431e-16
UniRef100_Q60967	Papss1	0.956073	0.11489	0.826977	0.616644	0.0016858	0.003148	0.277304	4.87464e-15
UniRef100_Q9QXA6	Slc7a9	0.00231706	0.258046	0.297118	0.56564	7.12e-09	1.56e-07	1.65553	5.22462e-14
UniRef100_Q9DCV7	Krt7	0.108286	0.526143	0.956126	0.31678	0.0010259	0.0151046	-0.353587	2.15244e-13
UniRef100_Q61024	Asns	0.607349	0.0881512	0.674113	0.44008	0.000201644	0.00672781	-0.440647	8.4206e-13
UniRef100_O35400	Sult2b1	0.462659	0.660301	0.0909154	0.992261	0.000430699	0.20575	0.348768	1.13445e-12
UniRef100_P35951	Ldlr	0.285994	0.135212	0.533338	0.9527	0.000755818	0.0817735	0.316095	1.56964e-11
UniRef100_Q8VBW1	Slc6a8	0.414289	0.361312	0.268842	0.539775	1.91e-06	0.00024796	0.569498	2.60135e-11
UniRef100_P33587	Proc	0.287629	0.858691	0.214687	0.5548	0.0221393	0.00377892	-0.20797	1.28019e-10
UniRef100_Q8CIM7	Cyp2d26	0.042851	0.0630663	0.0435841	0.337532	2.06e-09	1.5e-05	1.36692	2.44013e-10
UniRef100_Q99KB8	Hagh	0.856322	0.880265	0.148926	0.823776	0.00531398	0.0282867	0.280438	5.96963e-10
UniRef100_P70452	Stx4a	0.783255	0.663976	0.877562	0.900826	0.00764961	0.00968921	0.2031	1.10364e-09
UniRef100_Q8R0P4	1810020D17Rik	0.660513	0.987152	0.058366	0.802642	0.00311253	0.111207	0.299284	2.40077e-09
UniRef100_Q3UG39	Ulk2	0.366178	0.331676	0.21827	0.214011	0.00972819	0.0904632	0.322979	3.47211e-09
UniRef100_Q9D154	Serpinb1a	0.563097	0.319734	0.653559	0.845107	0.000481285	0.0556966	0.372209	6.31588e-09
UniRef100_Q91XH6	Vti1b	0.674634	0.998598	0.21606	0.785268	0.00268423	0.0900807	0.29765	7.7018e-09
UniRef100_Q99JY0	Hadhb	0.544828	0.839578	0.763919	0.755509	0.0297037	0.00626891	-0.220212	9.25596e-09
UniRef100_P21278	Gna11	0.634733	0.465403	0.147842	0.910707	0.00515379	0.0566041	0.268191	1.218e-08
UniRef100_P70245	Ebp	0.593016	0.748073	0.295495	0.689568	0.0300833	0.0127228	0.228782	1.32664e-08
UniRef100_P97364	Sephs2	0.342748	0.372667	0.249373	0.777116	0.00631947	0.118964	0.348055	1.86494e-08
UniRef100_P24788	Cdk11b	0.747748	0.929628	0.0792114	0.730514	0.00408635	0.168343	0.232618	1.92706e-08
UniRef100_Q9Z0E8	Slc22a5	0.251001	0.173835	0.123595	0.733619	0.0150396	0.0404212	0.276866	2.3146e-08
UniRef100_Q91YQ5	Rpn1	0.736998	0.396729	0.970836	0.370914	0.0313721	0.0149487	-0.180075	2.47749e-08
UniRef100_P54869	Hmgcs2	0.218759	0.193863	0.149637	0.910393	0.00295471	0.501537	-0.268793	5.99117e-08
UniRef100_P0CW02	Ly6c1	0.986379	0.748033	0.295822	0.244697	0.00587959	0.0516131	-0.338107	6.04347e-08
UniRef100_P09671	Sod2	0.659358	0.633814	0.362694	0.676956	0.0253143	0.0285439	0.194204	7.31458e-08
UniRef100_Q01405	Sec23a	0.386163	0.167187	0.430236	0.75989	0.0061307	0.343068	0.27022	1.48683e-07
UniRef100_Q01887	Ryk	0.875064	0.387059	0.636805	0.8831	0.0438491	0.00945408	0.173359	1.62287e-07
UniRef100_O55240	Rdh5	0.942829	0.611612	0.531199	0.126747	0.020801	0.0334589	0.183393	1.70219e-07
UniRef100_Q3UEU6	Ercc4	0.697965	0.36734	0.79654	0.978195	0.174657	0.00528126	0.167219	1.73545e-07
UniRef100_P21729	Grpr	0.408087	0.886236	0.858931	0.683769	0.0145278	0.0358076	-0.279202	2.62825e-07
UniRef100_P80313	Cct7	0.997507	0.413369	0.845362	0.647377	0.140885	0.00824594	-0.200462	2.98551e-07
UniRef100_Q922E4	Pcyt2	0.846468	0.649176	0.345936	0.791006	0.00154513	5.16e-05	0.382742	3.03107e-07
UniRef100_Q99KJ8	Dctn2	0.680976	0.588827	0.86956	0.724054	0.032367	0.0148619	0.241976	3.94704e-07
UniRef100_Q9D1A2	Cndp2	0.142278	0.713037	0.200375	0.737049	1.4e-07	0.00176567	0.656625	3.97465e-07
UniRef100_E9PWH3	Apbb2	0.898355	0.478026	0.473049	0.623316	0.0581474	0.0224344	0.195249	4.35583e-07
UniRef100_E9Q559	Atp2a3	0.774784	0.397178	0.561369	0.659379	0.0110399	0.061177	-0.251116	4.82864e-07
UniRef100_Q9D1F9	Slc37a4	0.462094	0.613689	0.0466437	0.813156	0.0133111	0.229565	0.27132	5.62756e-07
UniRef100_P35821	Ptpn1	0.849297	0.330291	0.263812	0.528388	0.0124248	0.197135	0.222628	6.41889e-07
UniRef100_Q9ER72	Cars	0.316371	0.742968	0.445823	0.751982	0.00658142	0.00582596	-0.214491	7.5351e-07
UniRef100_O88703	Hcn2	0.0652125	0.829189	0.251135	0.671909	0.00787491	0.428199	-0.266698	7.72514e-07
UniRef100_P62330	Arf6	0.690658	0.409004	0.554236	0.465847	0.019825	0.0601589	0.208439	1.48186e-06
UniRef100_P05784	Krt18	0.293245	0.491393	0.582272	0.419319	0.00331089	0.00189222	-0.42765	1.54724e-06
UniRef100_P62962	Pfn1	0.844325	0.835042	0.492894	0.528441	0.0750833	0.016134	0.244152	1.64322e-06
UniRef100_O89106	Fhit	0.0877764	0.174629	0.84158	0.0604772	9.21e-05	0.00179158	0.717837	1.71875e-06
UniRef100_Q3UD98	Dcaf11	0.243729	0.906657	0.0789809	0.964176	0.0184243	0.0440808	0.24244	1.74401e-06
UniRef100_Q3USN7	Dbp	0.051769	0.170169	0.00159026	0.583838	0.000108492	0.000284262	1.68076	1.86446e-06
UniRef100_Q8R2E9	Ero1lb	0.424246	0.0717217	0.126135	0.427541	0.153767	0.0258462	-0.160649	2.01327e-06
UniRef100_Q91WV7	Slc3a1	0.128422	0.598043	0.119725	0.753839	4.82e-08	0.0225879	0.854125	2.41115e-06
UniRef100_E9QAS7	Inpp5a	0.92315	0.771349	0.188041	0.696568	0.0226644	0.0813828	0.228737	2.67735e-06
UniRef100_P45377	Akr1b8	0.00877478	0.630041	0.15309	0.700266	3.08e-06	0.0625413	-0.90588	2.82004e-06
UniRef100_Q6GTF1	Aph1a	0.950364	0.692579	0.0732948	0.873601	0.0256814	0.202961	0.254598	2.90478e-06
UniRef100_Q8R0I0	Ace2	0.000216862	0.103873	0.186124	0.506545	1.26e-10	4.44e-10	2.11178	3.48142e-06
UniRef100_P15656	Fgf5	0.174311	0.366981	0.69833	0.925907	0.216002	0.0101237	-0.152423	3.60491e-06
UniRef100_Q9JIY5	Htra2	0.26694	0.509226	0.754038	0.76421	0.027574	0.08792	-0.202307	3.65796e-06
UniRef100_P23188	Furin	0.30648	0.97095	0.608687	0.0967314	0.403414	0.0312307	0.204295	4.09102e-06
UniRef100_O35047	Psmc3ip	0.398441	0.71181	0.523553	0.839218	0.022637	0.10271	-0.206534	4.2521e-06
UniRef100_Q8JZQ5	Abp1	0.0839167	0.0681439	0.133481	0.860273	4.03e-06	0.000406023	0.776173	4.77536e-06
UniRef100_P50283	Cd7	0.9901	0.408611	0.263826	0.319506	0.0160985	0.0979568	-0.207563	5.74571e-06
UniRef100_Q91XU3	Pip4k2c	0.824987	0.367433	0.72228	0.854385	0.0710488	0.0329331	0.182412	5.9518e-06
UniRef100_P48774	Gstm5	0.660294	0.594541	0.936151	0.156818	0.0177097	0.0163571	-0.296153	6.14991e-06
UniRef100_P47934	Crat	0.441145	0.567513	0.078593	0.674541	0.0307089	0.119666	0.206084	6.41544e-06
UniRef100_P97821	Ctsc	0.394527	0.928017	0.231339	0.577336	0.113032	0.0275665	-0.175111	7.04852e-06
UniRef100_Q8K0C4	Cyp51	0.440505	0.972546	0.840347	0.803573	0.00930393	0.237806	0.303337	7.19502e-06
UniRef100_Q8VCC1	Hpgd	0.1944	0.439092	0.405596	0.973733	0.00208902	0.037434	0.379434	8.15659e-06
UniRef100_Q9Z121	Ccl8	0.565199	0.495223	0.304824	0.982161	0.015462	0.187423	-0.297022	8.42517e-06
UniRef100_O70451	Slc16a7	0.358499	0.360258	0.555405	0.221438	0.0763249	0.020927	-0.177528	8.87376e-06
UniRef100_O35071	Kif1c	0.988694	0.968946	0.116162	0.542962	0.0470657	0.061533	0.160835	9.93754e-06
UniRef100_Q8VEJ9	Vps4a	0.46726	0.885514	0.504074	0.710779	0.0151082	0.295015	0.184592	1.25316e-05
UniRef100_Q5D0E4	Sh2d2a	0.135531	0.170829	0.451043	0.957798	0.115731	0.0603115	-0.216079	1.25863e-05
UniRef100_Q09199	B4galnt2	0.817033	0.920422	0.229416	0.327799	0.00594837	0.0204285	-0.316732	1.31032e-05
UniRef100_Q9Z306	Slc22a4	0.0673704	0.0671703	0.0976497	0.492973	0.00185678	4.08e-05	1.03102	1.6213e-05
UniRef100_Q8BL63	Pigk	0.548986	0.610916	0.827191	0.968096	0.118994	0.0296895	0.121025	1.67447e-05
UniRef100_O35350	Capn1	0.701796	0.469491	0.903468	0.728419	0.0253844	0.0887106	0.157415	1.83427e-05
UniRef100_Q6URW6	Myh14	0.579071	0.59721	0.700767	0.997598	0.0221822	0.168782	0.179503	2.05487e-05
UniRef100_Q9JLC6	Tef	0.0217621	0.0883226	0.0927368	0.780496	3.27e-05	0.000418368	0.752547	2.10093e-05
UniRef100_Q8K183	Pdxk	0.833641	0.826634	0.122289	0.467205	0.00259042	0.127922	0.277912	2.52381e-05
UniRef100_Q99LJ6	Gpx7	0.429019	0.578177	0.768249	0.462774	0.0719726	0.0482554	-0.155773	2.74382e-05
UniRef100_P97348	Rhod	0.549702	0.0579247	0.361954	0.549257	0.0497535	0.341887	0.282608	2.77127e-05
UniRef100_P34914	Ephx2	0.636303	0.562201	0.0838343	0.479194	3.43e-06	0.00111014	0.661147	3.29305e-05
UniRef100_Q8BGF9	Slc25a44	0.673636	0.278798	0.614719	0.575367	0.0535808	0.0518085	0.186856	3.3498e-05
UniRef100_Q07231	Zscan21	0.282444	0.621029	0.427135	0.999568	0.191992	0.00390921	0.195706	3.93055e-05
UniRef100_O60739	Eif1b	0.58468	0.407485	0.566977	0.528172	0.0316856	0.0505477	0.236569	4.0606e-05
UniRef100_P61148	Fgf1	0.34746	0.0747073	0.174765	0.371509	0.156427	0.0649189	0.258929	4.44018e-05
UniRef100_Q61847	Mep1b	0.727775	0.56839	0.107192	0.817897	2.05e-07	0.00199689	0.586579	4.80557e-05
UniRef100_O70572	Smpd2	0.260636	0.978292	0.280116	0.925971	0.16221	0.0205809	0.199462	5.02448e-05
UniRef100_P08680	Alas2	0.35875	0.937846	0.286545	0.49736	0.0612236	0.177534	-0.196574	5.07645e-05
UniRef100_Q9WV02	Rbmx	0.448368	0.908643	0.997165	0.123347	0.191951	0.0698637	0.15853	5.14835e-05
UniRef100_P70444	Bid	0.765768	0.430632	0.979011	0.910723	0.149471	0.0288523	-0.13887	5.25292e-05
UniRef100_O95166	Gabarap	0.607284	0.33365	0.582243	0.691898	0.0241847	0.245927	0.14538	5.48669e-05
UniRef100_E9QJS7	Cd97	0.954125	0.874014	0.846148	0.312301	0.0568135	0.0458223	-0.198042	5.79751e-05
UniRef100_Q9R207	Nbn	0.861538	0.25976	0.248446	0.383164	0.0954306	0.0694718	-0.113434	6.90999e-05
UniRef100_Q61878	Prg2	0.782013	0.861311	0.459984	0.322771	0.0783259	0.0768908	-0.154864	6.99078e-05
UniRef100_Q9JKR6	Hyou1	0.279933	0.408895	0.393766	0.663044	0.251881	0.00889103	-0.2594	7.14963e-05
UniRef100_B9EI21	Zmat3	0.302302	0.245892	0.801805	0.605852	0.0478766	0.185614	0.16329	7.19825e-05
UniRef100_Q9D0F6	Rfc5	0.774255	0.819229	0.376354	0.520657	0.0342989	0.051956	-0.145278	7.83681e-05
UniRef100_Q64464	Cyp3a13	0.0588539	0.219191	0.132441	0.936015	0.000753556	5.19e-05	0.704821	8.51114e-05
UniRef100_Q61425	Hadh	0.994275	0.0891126	0.222388	0.866844	0.0467354	0.061269	0.194061	9.46041e-05
UniRef100_O09008	Mfng	0.330889	0.280288	0.325013	0.764694	0.13717	0.048411	-0.101802	0.000104746
UniRef100_Q9WVL1	Ap4s1	0.29781	0.784174	0.884325	0.434269	0.000636195	5.6e-07	0.365332	0.00010676
UniRef100_Q9R194	Cry2	0.135111	0.5033	0.701355	0.452122	1.16e-05	0.000577739	0.399951	0.000111218
UniRef100_O55222	Ilk	0.464162	0.309537	0.632531	0.711363	0.0166507	0.0572764	0.171915	0.000111978
UniRef100_Q91W10	Slc39a8	0.923879	0.347796	0.176341	0.932872	0.210632	0.0706606	-0.16554	0.000112468
UniRef100_Q6NZB0	Dnajc8	0.789003	0.589686	0.760507	0.80531	0.00840132	0.0966377	0.148413	0.000117353
UniRef100_Q8BJT9	Edem2	0.612099	0.564294	0.69327	0.628153	0.0860387	0.10936	-0.188342	0.000126052
UniRef100_P51943	Ccna2	0.597724	0.624786	0.432218	0.37903	0.215905	0.0302629	-0.203616	0.000143721
UniRef100_Q8VEB1	Grk5	0.865441	0.104084	0.639244	0.784481	0.302586	0.0246024	0.11367	0.000150989
UniRef100_Q8C3K6	Slc5a1	0.179742	0.416059	0.131741	0.841961	5.25e-07	0.0325455	0.564574	0.000154007
UniRef100_P11610	Cd1d2	0.753016	0.668743	0.436934	0.410606	0.479939	0.0311563	-0.133314	0.000170753
UniRef100_Q80T32	Gpr133	0.215197	0.2803	0.200127	0.257441	0.0503231	0.0607032	0.3086	0.000171109
UniRef100_P28184	Mt3	0.304412	0.510332	0.674012	0.185856	0.17546	0.00281828	-0.327888	0.000176066
UniRef100_P70441	Slc9a3r1	0.196178	0.469786	0.265761	0.998293	1.26e-05	0.148774	0.370917	0.000181679
UniRef100_Q8BPD5	Apoa1	0.085203	0.286648	0.245494	0.712439	0.00238803	0.0437146	0.988883	0.000184186
UniRef100_B1ASL4	Tnfrsf18	0.828862	0.926525	0.0844924	0.152035	0.261831	0.121446	-0.136824	0.000187508
UniRef100_Q8BGK6	Slc7a6	0.603511	0.649886	0.118154	0.236469	0.0237181	0.148993	-0.104167	0.000200025
UniRef100_Q08297	Rad51	0.698459	0.780394	0.553523	0.579127	0.264262	0.0437529	-0.163776	0.000203762
UniRef100_Q9R0A0	Pex14	0.71703	0.630583	0.335055	0.822347	0.0578344	0.214433	0.172304	0.000208343
UniRef100_Q8BIJ7	Rufy1	0.521581	0.47885	0.0933172	0.324428	0.00844671	0.000350686	0.335884	0.000219101
UniRef100_Q9WUS4	Gja10	0.94704	0.267795	0.949127	0.128104	0.116816	0.113981	-0.13366	0.000221908
UniRef100_O08545	Efna3	0.833831	0.742109	0.614298	0.359328	0.0994472	0.0749049	-0.119843	0.000273146
UniRef100_Q8CIZ8	Vwf	0.454494	0.628446	0.438533	0.472517	0.172374	0.0748312	-0.107758	0.000330933
UniRef100_Q9DCT1	Akr1e1	0.405209	0.971618	0.143081	0.97379	0.111009	0.00343599	0.294716	0.000339916
UniRef100_Q9Z0G7	Zbtb22	0.373239	0.587766	0.642244	0.374643	0.0924129	0.10356	0.178617	0.000347597
UniRef100_P70236	Map2k6	0.966964	0.531875	0.293842	0.295675	0.0968879	0.00329223	0.251872	0.000360397
UniRef100_O54949	Nlk	0.27055	0.629076	0.20682	0.270317	0.0639812	0.212039	0.136117	0.000365508
UniRef100_P62195	Psmc5	0.716843	0.819988	0.627105	0.960588	0.0847618	0.0290616	0.171537	0.000381114
UniRef100_Q8R2F2	Degs2	0.588244	0.23384	0.0832144	0.90433	0.047935	0.0052457	0.342644	0.000382806
UniRef100_P20033	Pdgfa	0.896588	0.870674	0.660558	0.450905	0.0568405	0.102155	0.187913	0.000420525
UniRef100_P28867	Prkcd	0.407135	0.0570309	0.863692	0.969785	0.0231745	0.0199446	0.234154	0.000447914
UniRef100_Q61827	Mafk	0.81367	0.989806	0.211629	0.85998	0.1108	0.131003	0.142055	0.000462141
UniRef100_Q505F0	Asap1	0.806387	0.46522	0.117872	0.294841	0.119484	0.152032	-0.103393	0.000484584
UniRef100_Q9CQ49	Ncbp2	0.495603	0.5081	0.220842	0.939407	0.0751036	0.16102	-0.117036	0.000488116
UniRef100_Q91X34	Baat	0.191892	0.614873	0.438655	0.559995	0.0806652	0.000212907	0.378344	0.000502238
UniRef100_Q9JHC0	Gpx2	0.457417	0.0724812	0.137234	0.865848	0.000450771	0.000313786	-0.788396	0.000516509
UniRef100_P16330	Cnp	0.837592	0.843771	0.653735	0.979383	0.0772347	0.109466	0.128572	0.000523981
UniRef100_Q9JHW9	Aldh1a3	0.178914	0.387199	0.362174	0.422451	0.325773	0.0939528	-0.0966048	0.000546096
UniRef100_O09111	Ndufb11	0.689649	0.409444	0.102766	0.991289	0.0639081	0.026767	0.189652	0.000585495
UniRef100_P24549	Aldh1a1	0.593729	0.0477871	0.154181	0.866212	0.000143552	0.00293297	0.550956	0.000595882
UniRef100_Q542V3	Srsf4	0.896959	0.372799	0.563972	0.90359	0.0399233	0.473366	0.119162	0.000622432
UniRef100_Q6P9P6	Kif11	0.511858	0.949599	0.291566	0.750869	0.257308	0.0844433	-0.182549	0.000626209
UniRef100_P27548	Cd40lg	0.90351	0.764179	0.841694	0.27577	0.293195	0.0689611	-0.130343	0.00066525
UniRef100_Q9JKC8	Ap3m1	0.831912	0.822815	0.405689	0.801442	0.127466	0.0777564	-0.173669	0.000677008
UniRef100_P51658	Hsd17b2	0.928512	0.337344	0.124161	0.422883	0.046997	0.816132	-0.189098	0.000714471
UniRef100_Q9D883	U2af1	0.609142	0.794398	0.953859	0.7255	0.0537644	0.264959	0.134513	0.000784734
UniRef100_Q63953	Ifngr2	0.316182	0.93247	0.622242	0.691201	0.0815595	0.168211	0.148297	0.000821528
UniRef100_O55229	Chkb	0.704631	0.489053	0.170935	0.89549	0.0240871	0.0010907	0.369307	0.000902155
UniRef100_E9PXR3	Sesn1	0.179806	0.642076	0.426669	0.963889	0.136218	0.0039643	0.334797	0.000903704
UniRef100_P70460	Vasp	0.376606	0.623901	0.81872	0.927076	0.0894249	0.182854	0.133276	0.000914833
UniRef100_Q60676	Ppp5c	0.887795	0.0985902	0.640575	0.777616	0.0585764	0.224092	0.148179	0.00091925
UniRef100_Q61115	Ptch1	0.136956	0.494486	0.41714	0.244203	0.102191	0.200847	0.152353	0.000965582
UniRef100_Q8CFX1	H6pd	0.717721	0.237574	0.382522	0.967436	0.0374253	0.00234061	-0.337753	0.000969413
UniRef100_P17427	Ap2a2	0.707483	0.592487	0.0625424	0.773089	0.0746725	0.432979	0.153303	0.000970148
UniRef100_Q05A75	H2-T3	0.90495	0.222582	0.144297	0.881588	0.0183905	0.138282	0.18357	0.00100995
UniRef100_Q91W90	Txndc5	0.864747	0.362136	0.339896	0.152767	0.0122955	0.000114942	-0.455079	0.00101626
UniRef100_Q91YE3	Egln1	0.938934	0.92868	0.696302	0.925644	0.00380668	0.103201	0.176355	0.00101893
UniRef100_Q8R1B4	Eif3c	0.555047	0.770803	0.659073	0.667412	0.0300859	0.306186	0.135704	0.00109372
UniRef100_O35280	Chek1	0.618464	0.495199	0.13543	0.33672	0.560485	0.110111	-0.145869	0.00109372
UniRef100_P61952	Gng11	0.719912	0.519197	0.533478	0.934715	0.098668	0.176184	0.165835	0.00111515
UniRef100_Q61070	Ei24	0.772609	0.78002	0.484654	0.945179	0.0294023	0.0125022	0.214756	0.00112098
UniRef100_P60824	Cirbp	0.138818	0.52319	0.862653	0.164816	0.0352998	0.030683	0.396606	0.00115268
UniRef100_Q99JZ4	Sar1a	0.850924	0.877166	0.165637	0.991135	0.328531	0.0908158	-0.113076	0.0011589
UniRef100_P49429	Hpd	0.745022	0.920575	0.215652	0.485466	0.198926	0.0662936	-0.239505	0.00125674
UniRef100_O88325	Naglu	0.640853	0.73402	0.524992	0.997492	0.0345988	0.387569	-0.153459	0.0012759
UniRef100_Q60850	Slc23a3	0.496907	0.410892	0.448538	0.82749	0.125784	0.13344	-0.157409	0.00130903
UniRef100_P41136	Id2	0.245687	0.381577	0.0460832	0.543029	0.301899	0.00976347	0.325467	0.00132538
UniRef100_O35126	Atn1	0.999874	0.063877	0.882725	0.182984	0.137289	0.122828	0.195409	0.00132625
UniRef100_Q60930	Vdac2	0.406666	0.623798	0.389387	0.596334	0.117709	0.174603	0.142948	0.00139007
UniRef100_P70182	Pip5k1a	0.836833	0.956353	0.410689	0.857519	0.116778	0.165985	0.146949	0.00143314
UniRef100_Q9R1X4-6	Timeless	0.53386	0.486782	0.389248	0.362626	0.281003	0.144264	-0.088646	0.00145257
UniRef100_A2A688	Ace	0.228046	0.250636	0.199325	0.755765	0.209717	0.126729	0.109057	0.00146711
UniRef100_Q9CR62	Slc25a11	0.775681	0.0876427	0.230899	0.68645	0.0715924	0.00511643	0.291383	0.00149507
UniRef100_Q8BKY8	Mterfd3	0.395279	0.708083	0.705195	0.24162	0.00608431	0.518606	0.24911	0.00149917
UniRef100_Q64705	Usf2	0.746762	0.651067	0.881188	0.285065	0.261617	0.106203	0.120771	0.0015029
UniRef100_Q9D1M7	Fkbp11	0.196567	0.608578	0.0840309	0.115342	0.000280227	1.19e-05	-0.699407	0.00153092
UniRef100_O88319	Ntsr1	0.966641	0.553066	0.766374	0.963522	0.118063	0.13228	-0.10209	0.00153862
UniRef100_P40764	Dlx2	0.363895	0.393486	0.140358	0.284857	0.141095	0.29196	-0.198273	0.00156676
UniRef100_Q9CQW1	Ykt6	0.482736	0.396625	0.908147	0.526844	0.213604	0.0249002	0.176361	0.00165522
UniRef100_Q5XPI3	Rnf123	0.252767	0.682392	0.790055	0.442696	0.213883	0.21092	0.102742	0.00166619
UniRef100_P55288	Cdh11	0.579893	0.738976	0.603617	0.49906	0.414992	0.0523506	0.124817	0.00170595
UniRef100_Q9ERA0	Tcfcp2	0.469213	0.46971	0.742535	0.733249	0.195867	0.0104842	0.142938	0.0017452
UniRef100_Q99KS6	2310004I24Rik	0.480003	0.389566	0.173104	0.87929	0.0532024	9.6e-07	0.459205	0.0017523
UniRef100_E9QB02	Mars	0.83673	0.493569	0.607509	0.969453	0.193949	0.117526	-0.156468	0.0017642
UniRef100_Q7TN25	Sf3a2	0.962665	0.91219	0.811314	0.825258	0.4543	0.0478861	0.10389	0.00180015
UniRef100_Q3TM37	Snw1	0.326459	0.853672	0.115223	0.925071	0.384579	0.0854032	0.107303	0.00183228
UniRef100_Q62035	Ptafr	0.370583	0.630849	0.172235	0.396855	0.011448	0.257889	0.205278	0.0018575
UniRef100_Q8R080	Gtse1	0.634531	0.0991526	0.456241	0.401171	0.0731098	0.340495	-0.111171	0.00186865
UniRef100_P53566	Cebpa	0.638149	0.799627	0.620939	0.978765	0.242088	0.0724706	0.138881	0.0018772
UniRef100_Q61462	Cyba	0.888348	0.0427437	0.00318673	0.155756	6.66e-05	0.0063958	-0.774024	0.00196375
UniRef100_Q91VE0	Slc27a4	0.633677	0.556623	0.165224	0.770652	0.00209232	0.694143	0.264257	0.00197917
UniRef100_Q8BTW9	Pak4	0.924469	0.374938	0.573935	0.59438	0.204952	0.0834043	0.117909	0.00211558
UniRef100_Q9CQ60	Pgls	0.818548	0.928766	0.399066	0.278815	0.134578	0.113745	0.114138	0.00235772
UniRef100_P41216	Acsl1	0.594596	0.690357	0.055545	0.633372	0.0022802	0.0625074	0.393648	0.00245271
UniRef100_Q6IQX7	Chpf	0.844361	0.742123	0.833691	0.63542	0.0338726	0.523969	-0.145947	0.00250644
UniRef100_O08997	Atox1	0.611725	0.945881	0.39517	0.801379	0.019705	0.423942	0.160958	0.00251931
UniRef100_P31649	Slc6a13	0.38519	0.46908	0.81528	0.646683	0.0582465	0.314609	-0.143391	0.0025681
UniRef100_P97449	Anpep	0.0210153	0.542584	0.253304	0.65947	6.19e-05	0.00574857	1.21942	0.00267134
UniRef100_Q64249	Nr6a1	0.0904449	0.618298	0.676147	0.476233	0.230424	0.26076	-0.125311	0.0027251
UniRef100_Q3TSQ6	Rab4a	0.646288	0.188292	0.492382	0.740393	0.0586683	0.0144761	0.34584	0.00274875
UniRef100_Q9BCZ4	H47	0.677986	0.840328	0.341945	0.793223	0.143788	0.325195	0.157635	0.00277475
UniRef100_Q9R0M4	Podxl	0.737051	0.315584	0.500664	0.713359	0.377168	0.0745003	0.148278	0.00279592
UniRef100_Q68FF6	Git1	0.899269	0.550118	0.740189	0.980512	0.203153	0.115129	0.0957739	0.00281221
UniRef100_P15261	Ifngr1	0.166349	0.783291	0.927044	0.691939	0.038897	0.00123273	0.296612	0.00286494
UniRef100_Q9R0S0	Gadd45g	0.188952	0.0947334	0.222654	0.833375	0.316928	0.0218668	-0.455681	0.00291163
UniRef100_Q62000	Ogn	0.161076	0.538116	0.155805	0.575913	0.912451	0.068752	0.0853721	0.00292386
UniRef100_P01139	Ngf	0.77015	0.495401	0.934001	0.396644	0.0332287	0.1353	-0.179385	0.00304797
UniRef100_Q99M04	Lias	0.89501	0.360103	0.637428	0.232907	0.27811	0.287223	0.156798	0.00314536
UniRef100_P49282	Slc11a2	0.129133	0.21765	0.183603	0.687875	0.001303	0.405927	0.295128	0.00322935
UniRef100_Q91Y97	Aldob	0.392844	0.817347	0.161045	0.899877	3.79e-07	0.223543	0.580465	0.00327821
UniRef100_O88783	F5	0.426225	0.33485	0.32525	0.331706	0.1348	0.244034	-0.118154	0.00334223
UniRef100_P16406	Enpep	0.0359632	0.328459	0.351676	0.637573	2.01e-07	0.0483033	1.10869	0.00338729
UniRef100_P00493	Hprt	0.54007	0.941401	0.430811	0.938454	0.0563325	0.329141	0.127063	0.0033923
UniRef100_P26040	Ezr	0.74553	0.323539	0.14925	0.601074	0.000253746	0.686047	0.260143	0.00340306
UniRef100_Q3THA6	Srsf7	0.316336	0.769762	0.744973	0.953967	0.101919	0.0365793	-0.212379	0.00340496
UniRef100_P49135	Ercc3	0.57787	0.73558	0.720237	0.796728	0.072276	0.40975	0.117091	0.00345534
UniRef100_D3Z2V4	Scarb1	0.436591	0.755171	0.693217	0.582357	0.142536	0.175687	-0.0827452	0.00353657
UniRef100_P04925	Prnp	0.457899	0.296036	0.456174	0.73811	0.0855702	0.00243625	-0.333008	0.00354795
UniRef100_P22561	Wt1	0.249104	0.15083	0.844071	0.715372	0.152106	0.172583	-0.120953	0.00356605
UniRef100_P35545	Fau	0.260132	0.645218	0.633199	0.848354	0.215151	0.147243	0.13197	0.00360927
UniRef100_A2A5L5	Cd40	0.831169	0.669638	0.356835	0.872928	0.0514025	0.195799	-0.144805	0.00363922
UniRef100_P22389	Edn2	0.95573	0.0483673	0.449267	0.41712	0.00162939	0.00308004	0.650679	0.00367975
UniRef100_Q9Z2D6	Mecp2	0.417319	0.378815	0.890073	0.415693	0.21671	0.193449	0.129823	0.00369198
UniRef100_Q61146	Ocln	0.264072	0.168783	0.208111	0.670913	0.191033	0.735203	0.146402	0.00373787
UniRef100_Q9Z1W9	Stk39	0.59283	0.164937	0.289119	0.91187	0.270472	0.102033	-0.12913	0.00378497
UniRef100_Q61456	Ccna1	0.906548	0.378791	0.999984	0.41281	0.27213	0.140504	-0.0943235	0.00383263
UniRef100_E9Q605	Chuk	0.387054	0.309008	0.753036	0.511219	0.0240767	0.854977	0.189203	0.00391307
UniRef100_O54791	Maff	0.101733	0.464663	0.987314	0.759107	0.0289515	0.322782	0.175855	0.0039803
UniRef100_O35490	Bhmt	0.126784	0.381105	0.359939	0.899263	0.0030649	0.105392	-0.21378	0.00406497
UniRef100_Q8K409	Polb	0.863583	0.976865	0.892839	0.736705	0.117519	0.227156	0.127904	0.00412556
UniRef100_P32443	Meox2	0.161867	0.409421	0.65709	0.654292	0.500692	0.0959579	-0.0898062	0.0041572
UniRef100_Q8JZR0	Acsl5	0.503982	0.456382	0.13386	0.883142	0.0209414	0.0740513	0.215448	0.00437374
UniRef100_Q61187	Tsg101	0.295263	0.287246	0.139077	0.82905	0.19514	0.382624	0.117492	0.0043798
UniRef100_Q3UGI8	Tsc2	0.688519	0.398692	0.958468	0.977747	0.0493883	0.541874	0.130971	0.00459932
UniRef100_Q99MQ3	Pink1	0.0648202	0.362869	0.93734	0.605582	0.116993	0.00131352	0.355504	0.00465667
UniRef100_P48722	Hspa4l	0.624096	0.436705	0.229088	0.847868	0.488547	0.0228226	-0.151278	0.00465731
UniRef100_P06798	Hoxa4	0.785525	0.842761	0.263781	0.756755	0.560478	0.0794327	-0.0893618	0.00468388
UniRef100_Q04207	Rela	0.358151	0.726882	0.947613	0.92648	0.0404428	0.309219	0.165382	0.00468617
UniRef100_P08042	Zfp1	0.701381	0.637297	0.498287	0.117379	0.130827	0.285561	0.128889	0.00471731
UniRef100_Q8K595	Mcoln2	0.247103	0.888325	0.434641	0.962211	0.0234736	0.454003	-0.170583	0.00476376
UniRef100_P55264	Adk	0.593428	0.893577	0.485199	0.750039	0.291917	0.0969307	0.16163	0.00478325
UniRef100_P06151	Ldha	0.718633	0.91541	0.321081	0.708231	0.127875	0.104883	0.142346	0.00481726
UniRef100_P08920	Cd2	0.991628	0.381494	0.203613	0.97965	0.110389	0.392843	-0.142156	0.0048404
UniRef100_Q8R0J2	Mpdu1	0.612394	0.338271	0.0516099	0.813511	0.169478	0.0398446	0.285617	0.00484587
UniRef100_Q9QYC7	Ggcx	0.536112	0.214928	0.614175	0.215652	0.0106929	0.0328243	-0.180188	0.00485315
UniRef100_Q9CQ01	Rnaset2b	0.301422	0.715689	0.167949	0.457734	0.520901	0.0995192	-0.103512	0.00487596
UniRef100_A2A410	Pax6	0.759768	0.532898	0.737692	0.610463	0.315379	0.155094	0.0774165	0.00488591
UniRef100_E9Q0X3	Cd160	0.425024	0.690161	0.732434	0.162232	0.0647472	0.0245768	-0.256907	0.00490612
UniRef100_Q9CPU2	Ndufb2	0.938278	0.521648	0.0765552	0.718515	0.467148	0.167389	0.081213	0.00493205
UniRef100_O54982	Kcnu1	0.0100253	0.235609	0.0625126	0.0811126	0.167468	0.295446	0.762189	0.00503912
UniRef100_P50284	Ltbr	0.607845	0.873045	0.244092	0.436018	0.249327	0.188357	0.129323	0.00513292
UniRef100_Q62386	Il17a	0.426432	0.368732	0.635307	0.539093	0.532706	0.0804856	-0.107556	0.00514544
UniRef100_Q64279	Hand1	0.5157	0.390127	0.805109	0.477452	0.027385	0.194328	-0.155799	0.00515545
UniRef100_P21129	Slc10a3	0.690038	0.385955	0.915602	0.719781	0.011857	0.00020842	0.298622	0.0051621
UniRef100_Q62225	Cish	0.514239	0.51229	0.971708	0.515745	0.146251	0.0540077	0.241408	0.00527022
UniRef100_P35459	Ly6d	0.586785	0.958627	0.0141792	0.540196	0.0573198	0.0199506	-0.425296	0.00539461
UniRef100_Q9JHU9	Isyna1	0.634267	0.415569	0.35084	0.472551	0.436212	0.147543	-0.150212	0.00550416
UniRef100_O88502	Pde8a	0.0902594	0.571161	0.846775	0.89025	0.117874	0.528088	0.160553	0.00554554
UniRef100_Q03526	Itk	0.424173	0.650195	0.153979	0.645261	0.132175	0.126258	-0.0902931	0.00557263
UniRef100_O88199	Chst3	0.569843	0.374994	0.923244	0.561738	0.278948	0.00884874	-0.325329	0.00557992
UniRef100_O88890	Sh2d1a	0.596166	0.718415	0.710543	0.683718	0.237502	0.125296	-0.0912551	0.00562674
UniRef100_Q04899	Cdk18	0.931368	0.28291	0.324765	0.9551	0.147442	0.285065	0.0948768	0.00566618
UniRef100_Q2NL51	Gsk3a	0.937977	0.787326	0.0937033	0.41618	0.193548	0.606754	0.131505	0.00581377
UniRef100_O09106	Hdac1	0.377416	0.628399	0.172826	0.757321	0.283139	0.0406866	-0.224357	0.00591146
UniRef100_Q9CQR6	Ppp6c	0.393486	0.48115	0.153997	0.823328	0.0804877	0.356829	0.117131	0.00595935
UniRef100_Q8VE47	Uba5	0.992206	0.160158	0.73131	0.823947	0.236157	0.098993	-0.151917	0.005966
UniRef100_Q91V89	Ppp2r5d	0.513683	0.996552	0.457562	0.92478	0.102817	0.331081	0.129935	0.00608403
UniRef100_Q9QYM5	Rnd2	0.789599	0.263949	0.506657	0.477954	0.224497	0.130058	-0.115159	0.00611288
UniRef100_Q62186	Ssr4	0.658895	0.940707	0.991705	0.880306	0.00984144	0.00600746	-0.211546	0.00658661
UniRef100_P04235	Cd3d	0.0968079	0.347794	0.428993	0.243678	0.0276146	0.126758	-0.485287	0.00661059
UniRef100_Q8VCH6	Dhcr24	0.711704	0.252991	0.152538	0.93825	0.0376705	0.00246504	0.334286	0.00669714
UniRef100_P68133	Acta1	0.166175	0.686221	0.177246	0.430894	0.00481849	0.639079	0.366595	0.00698082
UniRef100_Q3TL44	Nlrx1	0.628938	0.804017	0.167407	0.84466	0.111499	0.236344	0.115163	0.0070924
UniRef100_Q922V4	Plrg1	0.559625	0.348977	0.077267	0.488492	0.358934	0.136751	-0.203083	0.00711897
UniRef100_Q8R0A0	Gtf2f2	0.616909	0.598916	0.804478	0.811688	0.11266	0.503312	0.120192	0.00716281
UniRef100_Q9QYY0	Gab1	0.263363	0.631828	0.52627	0.867577	0.0639801	0.00270976	0.289283	0.00718628
UniRef100_Q78IQ7	Slc39a4	0.702377	0.720087	0.825843	0.537337	0.0557823	0.0475508	-0.204446	0.00725206
UniRef100_Q8VE73	Cul7	0.873754	0.327106	0.386983	0.768115	0.371142	0.111021	0.0828409	0.0074841
UniRef100_Q63ZW7	Inadl	0.319921	0.378152	0.453867	0.219333	0.000640732	0.600544	0.255961	0.00761221
UniRef100_Q8R105	Vps37c	0.5697	0.369564	0.245036	0.949323	0.38045	0.11153	0.125409	0.00765871
UniRef100_E9Q414	Apob	0.000752247	0.593819	0.251058	0.930734	1.25e-08	0.0129501	0.934095	0.00768883
UniRef100_Q9DBN5	Lonp2	0.62033	0.803221	0.0396771	0.640367	0.28299	0.014617	0.228408	0.00770408
UniRef100_A2AUK5	Epb4.1l1	0.18717	0.170813	0.245172	0.655265	0.556624	0.0207421	0.277036	0.00786191
UniRef100_Q69ZY3	Pcf11	0.989754	0.986568	0.577992	0.472744	0.170374	0.204774	-0.091436	0.00792265
UniRef100_P56469	Cort	0.93181	0.534705	0.429177	0.266638	0.0218681	0.0972286	-0.215764	0.00793328
UniRef100_Q8BKG3	Ptk7	0.7387	0.349027	0.806707	0.353394	0.205964	0.220532	-0.0833914	0.00795252
UniRef100_Q3UZ64	Nfatc3	0.29077	0.485992	0.888737	0.411969	0.103414	0.302811	0.128406	0.00801552
UniRef100_P52293	Kpna2	0.97794	0.848382	0.576722	0.768388	0.158359	0.349965	-0.118737	0.00818042
UniRef100_P70333	Hnrnph2	0.547547	0.25128	0.203759	0.736104	0.331472	0.116753	0.0862101	0.00823717
UniRef100_Q8BTS4	Nup54	0.886149	0.60326	0.260288	0.674634	0.763503	0.0895945	0.0744433	0.00827791
UniRef100_Q9D0F3	Lman1	0.779926	0.283911	0.507246	0.764329	0.0585899	0.0090472	-0.313232	0.00830527
UniRef100_Q9WUP0	Ramp2	0.543352	0.365645	0.730645	0.753146	0.373807	0.0820006	0.111342	0.00834832
UniRef100_Q9Z261	Cldn7	0.729405	0.19133	0.432547	0.873358	0.281542	0.0823664	0.177456	0.00840675
UniRef100_O35215	Ddt	0.932744	0.802504	0.21697	0.840742	0.0182918	0.35082	0.16198	0.00842002
UniRef100_B2RUD7	Psap	0.54391	0.706732	0.947112	0.593827	0.0765505	0.651404	-0.10475	0.00847927
UniRef100_Q3TBC5	Avil	0.828837	0.392584	0.801383	0.473948	0.127305	0.443481	-0.142357	0.00848502
UniRef100_P50608	Fmod	0.400653	0.511711	0.784013	0.623445	0.124393	0.226817	0.0845704	0.0085194
UniRef100_P97499	Tep1	0.848455	0.880742	0.15912	0.575549	0.000543846	0.0859055	0.26192	0.00855863
UniRef100_P08113	Hsp90b1	0.358096	0.986124	0.197013	0.55923	0.0895927	0.0182535	-0.389026	0.00862592
UniRef100_P70695	Fbp2	0.657135	0.844361	0.205878	0.970944	0.0826835	0.0414006	0.235176	0.00865273
UniRef100_P00184	Cyp1a1	0.0392167	0.0829626	0.327462	0.00628245	0.00243103	0.587504	1.23451	0.00865792
UniRef100_E9QMJ8	Axin1	0.676782	0.952755	0.970326	0.970608	0.064519	0.711799	0.114228	0.00866001
UniRef100_O35945	Aldh1a7	0.326074	0.217746	0.0607766	0.954042	0.000367316	0.858217	0.355874	0.00868611
UniRef100_Q8BH80	Vapb	0.434029	0.378769	0.789214	0.634091	0.0951375	0.911074	0.102602	0.00879295
UniRef100_O88796	Rpp30	0.210093	0.564878	0.767475	0.56992	0.0618221	0.00740277	-0.203852	0.00888266
UniRef100_Q91V12	Acot7	0.869965	0.875914	0.676192	0.389586	0.227528	0.297448	-0.108275	0.00889462
UniRef100_A2A8F7	Pomgnt1	0.981764	0.457455	0.525946	0.995138	0.16291	0.23594	-0.10133	0.00890572
UniRef100_Q5U462	Cdcp1	0.95787	0.645854	0.373773	0.734916	0.00436149	0.33806	-0.181307	0.00900811
UniRef100_P70453	Pde7a	0.558763	0.719713	0.696283	0.871721	0.00260342	0.285021	0.257431	0.00916423
UniRef100_Q9WU84	Ccs	0.935197	0.222579	0.238226	0.727528	0.389428	0.0049966	0.243905	0.00923869
UniRef100_Q9CQW5	Lgals2	0.734421	0.356996	0.327378	0.838409	0.696737	0.106087	-0.116813	0.00929552
UniRef100_E9Q509	Pklr	0.861929	0.902233	0.476703	0.98083	0.00368564	0.109779	0.178696	0.00933458
UniRef100_Q9EQH4	Taf8	0.348651	0.401591	0.368278	0.915457	0.251021	0.19914	-0.0755949	0.00937575
UniRef100_Q8VHT7	Gtf3a	0.145679	0.729022	0.702407	0.259012	0.114916	0.287272	0.122579	0.00938434
UniRef100_P10518	Alad	0.867169	0.636748	0.955471	0.686792	0.182187	0.301705	-0.113887	0.00951583
UniRef100_P31955	Areg	0.0414235	0.962213	0.467002	0.268119	0.764072	0.00222973	-0.654231	0.00957536
UniRef100_Q80ZK9	Wdtc1	0.30298	0.607183	0.531295	0.894849	0.477877	0.0264565	0.142723	0.00958717
UniRef100_Q96FJ2	Dynll2	0.726424	0.315073	0.377692	0.906171	0.312504	0.27855	0.120268	0.00961696
UniRef100_Q64676	Ugt8a	0.88411	0.0977537	0.672014	0.88536	0.003455	0.0677543	0.480023	0.00980038
UniRef100_O70252	Hmox2	0.700555	0.894443	0.435571	0.736293	0.0365224	0.00750425	0.216633	0.00988226
UniRef100_P70186	Epyc	0.701708	0.954937	0.636093	0.541118	0.296877	0.228077	-0.108074	0.00993891
UniRef100_P33766	Fpr1	0.192872	0.592735	0.888581	0.769085	0.00916546	0.00853135	-0.194201	0.0100236
UniRef100_Q922G0	Slc25a36	0.571254	0.426896	0.126906	0.424826	0.348982	0.212883	0.216628	0.0100277
UniRef100_E9QPD7	Pcx	0.122216	0.380564	0.905023	0.361119	0.00686188	0.465032	0.264265	0.0100468
UniRef100_P70671	Irf3	0.592035	0.200031	0.3048	0.861238	0.30401	0.09657	0.119782	0.0101315
UniRef100_Q61088	Fzd4	0.722932	0.943631	0.564499	0.365827	0.18017	0.331844	0.0946966	0.0106374
UniRef100_P51944	Ccnf	0.270077	0.282141	0.833703	0.502931	0.0354988	0.0921181	-0.153745	0.0107746
UniRef100_P50544	Acadvl	0.247726	0.841151	0.123839	0.364294	0.133527	0.594425	-0.127725	0.0108511
UniRef100_A2ASW3	Rapgef4	0.493673	0.36176	0.908314	0.486001	0.0138118	0.138323	-0.171029	0.0112699
UniRef100_P97311	Mcm6	0.437696	0.187702	0.372932	0.36622	0.213613	0.175444	-0.0998242	0.011352
UniRef100_O35448	Ppt2	0.673834	0.704655	0.64373	0.590575	0.2617	0.275804	0.0790902	0.0113837
UniRef100_Q9QZ18	Olfr71	0.512515	0.182219	0.51781	0.692869	0.212002	0.241545	-0.0838472	0.0114752
UniRef100_Q61056	Trpc1	0.10854	0.884784	0.131859	0.0655276	0.775052	0.152174	-0.0561325	0.0114913
UniRef100_P19091	Ar	0.560501	0.239476	0.653354	0.342129	0.154623	0.228106	0.105685	0.0116081
UniRef100_Q91VR8	6720456B07Rik	0.762589	0.899827	0.602402	0.887031	0.21806	0.00471826	0.161165	0.0116087
UniRef100_O35130	Emg1	0.85851	0.553527	0.787822	0.903678	0.0677362	0.0436565	-0.174948	0.0116672
UniRef100_B2RQ86	Foxl1	0.927981	0.541893	0.570188	0.427854	0.180509	0.213515	0.112061	0.0118055
UniRef100_O35488	Slc27a2	0.00280125	0.767851	0.114354	0.765672	2.07e-05	0.435293	0.756712	0.0118363
UniRef100_Q62442	Vamp1	0.384676	0.209351	0.324642	0.467204	0.223115	0.382957	0.0935794	0.0120509
UniRef100_P84095	Rhog	0.546656	0.49137	0.468599	0.961866	0.156814	0.652715	0.144788	0.0121306
UniRef100_P50518	Atp6v1e1	0.775493	0.175591	0.798309	0.34189	0.262568	0.0731978	0.131904	0.0121477
UniRef100_Q9CZT8	Rab3b	0.105046	0.734463	0.696769	0.732173	0.103619	0.375159	0.123751	0.0121822
UniRef100_Q3UE37	Ube2z	0.477076	0.784178	0.77591	0.612833	0.220389	0.251061	0.112816	0.0125016
UniRef100_Q8R000	Osta	0.526086	0.934024	0.374147	0.782027	0.00571913	0.000992115	0.590394	0.0125633
UniRef100_O70479	Tnfaip1	0.367178	0.604044	0.83465	0.581443	0.0509222	0.526758	0.130947	0.0125828
UniRef100_P43432	Il12b	0.451774	0.894663	0.800526	0.253201	0.0899289	0.482611	-0.138581	0.0126535
UniRef100_O70475	Ugdh	0.604441	0.351092	0.335952	0.839375	0.493814	0.146905	-0.069626	0.0127343
UniRef100_Q9WVG6	Carm1	0.836588	0.687945	0.794101	0.899298	0.765046	0.0719014	0.117121	0.0129692
UniRef100_Q02738	Gjb4	0.370394	0.514178	0.981126	0.498783	0.998283	0.145343	0.0834286	0.0130385
UniRef100_Q9WVS7	Map2k5	0.717606	0.548992	0.78243	0.975142	0.834091	0.0785887	0.082745	0.0131183
UniRef100_P48772	Cox8b	0.896128	0.0795932	0.267271	0.259252	0.649382	0.00288553	0.287863	0.0132797
UniRef100_Q8BQZ5	Cpsf4	0.834414	0.589738	0.194319	0.494964	0.404063	0.245489	0.101853	0.0133612
UniRef100_Q99LB7	Sardh	0.370556	0.359043	0.397721	0.370001	3.66e-05	0.0333305	0.278127	0.0134462
UniRef100_Q8CE08	Acpp	0.202047	0.275445	0.0832972	0.451606	0.201727	0.427053	0.215986	0.0136636
UniRef100_Q00288	Pax8	0.929363	0.780566	0.757117	0.520007	0.67521	0.110897	0.0751868	0.013686
UniRef100_D3Z5N5	Pikfyve	0.0638195	0.339965	0.675158	0.83312	0.309926	0.293564	0.0696751	0.0139722
UniRef100_Q60997	Dmbt1	0.227439	0.00364835	0.000368292	0.590123	0.271751	0.00210013	-1.13215	0.0139836
UniRef100_P21447	Abcb1a	0.823958	0.131266	0.405673	0.276265	0.0334608	0.191506	-0.12382	0.0140671
UniRef100_P49117	Nr2c2	0.966835	0.702213	0.564401	0.393429	0.155255	0.318944	0.0739783	0.014104
UniRef100_Q921X9	Pdia5	0.123486	0.569536	0.807847	0.651556	0.00843048	0.00266328	-0.395793	0.0143669
UniRef100_Q91YM2	Grlf1	0.533145	0.516495	0.651211	0.932827	0.0265185	0.280526	0.113539	0.0143894
UniRef100_P54843	Maf	0.0549832	0.217069	0.755679	0.744913	0.0108524	0.035296	0.467606	0.0144758
UniRef100_Q6Q783	Suv420h2	0.889143	0.913884	0.856576	0.868653	0.437966	0.0171565	0.108141	0.0145044
UniRef100_Q68EG4	Slc4a3	0.75223	0.475219	0.846931	0.59106	0.140991	0.297482	-0.0765077	0.0145914
UniRef100_Q3TMT4	Aldh9a1	0.781041	0.553374	0.106355	0.875383	0.00231806	0.07415	0.249598	0.0150263
UniRef100_P08730	Krt13	0.66318	0.946805	0.327074	0.965355	0.291164	0.18566	-0.0802865	0.0151674
UniRef100_Q8C208	Ikzf4	0.297049	0.950133	0.934635	0.421633	0.240418	0.13452	-0.107338	0.0152575
UniRef100_P42228	Stat4	0.209519	0.34035	0.450731	0.696628	0.271345	0.308806	-0.0857947	0.0153508
UniRef100_P42925	Pxmp2	0.975746	0.965254	0.553568	0.537033	0.189214	0.264287	0.0992524	0.0154136
UniRef100_P04186	Cfb	0.380487	0.552458	0.865007	0.60892	2.78e-05	0.0845244	0.331639	0.0155995
UniRef100_Q9Z1D1	Eif3g	0.991786	0.540562	0.741777	0.804487	0.303401	0.209071	0.0938909	0.0156936
UniRef100_Q9D7J6	Dnase1l1	0.646582	0.328543	0.75272	0.522754	0.242169	0.13816	0.120314	0.0158557
UniRef100_Q8R1L4	Kdelr3	0.494098	0.0980745	0.782823	0.938155	0.0280827	0.00762911	-0.368254	0.0159241
UniRef100_Q62419	Sh3gl1	0.931748	0.708727	0.879652	0.13652	0.465858	0.0782676	-0.130884	0.015943
UniRef100_Q400C8	Amz2	0.782909	0.922082	0.718588	0.944999	0.416666	0.168684	0.107116	0.0160494
UniRef100_P02716	Chrnd	0.766723	0.633116	0.607365	0.466995	0.296586	0.262274	-0.118701	0.0161272
UniRef100_Q91XE7	Atp6v0e2	0.446157	0.153076	0.699471	0.88064	0.327578	0.0194303	0.224841	0.0162773
UniRef100_Q61391	Mme	0.0113382	0.470292	0.258375	0.834034	0.00881446	0.308055	0.940096	0.0163136
UniRef100_Q9Z0X1	Aifm1	0.806151	0.857048	0.900778	0.646729	0.888509	0.113556	-0.0831499	0.0163394
UniRef100_Q06986	Siah2	0.422018	0.275454	0.909537	0.929584	0.101771	0.3934	-0.106538	0.0164048
UniRef100_Q8BH04	Pck2	0.966535	0.53154	0.125391	0.383613	0.624453	0.222711	-0.0783548	0.0164682
UniRef100_Q8K0D5	Gfm1	0.924297	0.470231	0.374836	0.97057	0.669859	0.163932	-0.0867493	0.0165145
UniRef100_Q3TZ86	C5ar1	0.663093	0.0666102	0.519258	0.949486	0.412108	0.336346	-0.0978257	0.0166275
UniRef100_P63096	Gnai1	0.78866	0.266883	0.166164	0.664324	0.125375	0.479788	-0.108321	0.0168643
UniRef100_E9Q396	Nrg3	0.990588	0.557039	0.621367	0.859543	0.411893	0.220292	-0.0860062	0.0168767
UniRef100_P58735	Slc26a1	0.476148	0.39936	0.828301	0.123671	0.629011	0.226897	0.0824501	0.0169737
UniRef100_P62380	Tbpl1	0.766809	0.848405	0.782998	0.851274	0.52719	0.130246	-0.0755846	0.0171617
UniRef100_Q3UV55	Nr1d1	0.0797519	0.816753	0.0444026	0.893672	0.284336	0.288308	0.484484	0.0178057
UniRef100_Q9QZ06	Tollip	0.422575	0.616753	0.52114	0.952985	0.551117	0.0956563	0.107812	0.0183808
UniRef100_P18155	Mthfd2	0.380645	0.69474	0.941135	0.935833	0.0445855	0.000313299	-0.262981	0.0184551
UniRef100_Q9Z1Q4	Ly6g6c	0.882907	0.214769	0.209934	0.56947	0.55426	0.00192841	-0.536102	0.0185419
UniRef100_O08542	Efna4	0.797916	0.684403	0.451378	0.363605	0.62684	0.157026	-0.0926882	0.0186687
UniRef100_P08122	Col4a2	0.423261	0.58353	0.263277	0.513246	0.218676	0.288629	0.0780546	0.018687
UniRef100_O54714	Pias3	0.911187	0.606915	0.420196	0.90852	0.250009	0.289262	0.0819373	0.0187535
UniRef100_Q497I4	Krt35	0.970698	0.421467	0.681936	0.529242	0.73524	0.156498	-0.0976132	0.0189756
UniRef100_P35292	Rab17	0.270028	0.95919	0.120011	0.844289	0.532351	0.000699073	0.356912	0.019008
UniRef100_Q62137	Jak3	0.398235	0.184085	0.673464	0.460387	0.148189	0.417206	-0.080481	0.0190609
UniRef100_P49919	Cdkn1c	0.491629	0.183499	0.656138	0.997626	0.228443	0.2808	0.115062	0.0193706
UniRef100_P24807	Cd24a	0.561035	0.325851	0.0375056	0.503337	0.99469	0.0261297	-0.291989	0.0194547
UniRef100_Q15286	Rab35	0.33726	0.460395	0.356647	0.593918	0.153058	0.422624	0.117659	0.0195735
UniRef100_Q5SU73	Coil	0.537983	0.411911	0.640113	0.614879	0.390657	0.152089	-0.0864822	0.0197054
UniRef100_Q3U1J4	Ddb1	0.204499	0.207661	0.864718	0.821994	0.179396	0.810913	-0.0940093	0.019816
UniRef100_P20029	Hspa5	0.991482	0.776582	0.944539	0.838439	0.208282	0.0184168	-0.220314	0.0198754
UniRef100_Q6P571	Plk3	0.985464	0.545883	0.974116	0.761371	8.73e-06	0.205883	0.264585	0.0200678
UniRef100_O08644	Ephb6	0.397865	0.675805	0.933568	0.29287	0.22791	0.353064	-0.0874343	0.0202114
UniRef100_Q9JI46	Nudt3	0.774765	0.293631	0.490432	0.525763	0.0760961	0.44429	0.0959388	0.0203512
UniRef100_Q8BGB7	Enoph1	0.736322	0.153311	0.833361	0.383506	0.0998623	0.646176	0.106668	0.0203896
UniRef100_O08643	Gzmm	0.56569	0.364625	0.527498	0.229254	0.0632485	0.283249	-0.216859	0.0204282
UniRef100_O35969	Gamt	0.516289	0.913449	0.469954	0.784665	0.713083	0.126965	-0.0963238	0.0204502
UniRef100_O88848	Arl6	0.762656	0.906411	0.0169947	0.527159	0.0971961	0.00187479	-0.349338	0.0205223
UniRef100_O88811	Stam2	0.467916	0.9569	0.930454	0.635751	0.174478	0.394965	0.0737921	0.0208226
UniRef100_Q3UPL0	Sec31a	0.778813	0.690676	0.359995	0.794928	0.376603	0.276664	0.0738808	0.0208474
UniRef100_O54732	Mmp15	0.53279	0.908307	0.579024	0.758136	0.27094	0.204112	-0.134059	0.021064
UniRef100_Q9WTP2	Spry4	0.979196	0.422938	0.748182	0.847745	0.0211864	0.475747	0.135067	0.0211174
UniRef100_Q9CZB0	Sdhc	0.598938	0.4996	0.295445	0.89763	0.171841	0.679937	0.0818405	0.0211312
UniRef100_P21550	Eno3	0.406448	0.124414	0.398169	0.399394	0.214051	0.637249	0.225399	0.0212546
UniRef100_Q99LT0	Dpy30	0.837016	0.954973	0.70671	0.968157	0.419897	0.0112968	0.122382	0.0215267
UniRef100_Q4V9V3	Elovl1	0.631792	0.42727	0.915464	0.858159	0.010996	0.0050166	0.252994	0.0216394
UniRef100_Q921L8	Galnt11	0.596299	0.655123	0.114198	0.632637	0.00851614	0.0790443	0.201602	0.0216467
UniRef100_P19096	Fasn	0.993123	0.77986	0.991585	0.872183	0.00426004	0.0985368	0.165479	0.0216572
UniRef100_Q9QXW9	Slc7a8	0.278177	0.0985401	0.0139009	0.470035	0.000223234	0.205371	0.700926	0.021763
UniRef100_Q8K3G5	Vrk3	0.778368	0.908786	0.141009	0.87697	0.474603	0.248315	0.107044	0.0218093
UniRef100_P31428	Dpep1	0.588889	0.0451508	0.131591	0.899166	2e-05	0.540191	0.533113	0.022017
UniRef100_P11438	Lamp1	0.768088	0.62579	0.239561	0.589432	0.10069	0.0493296	0.160349	0.022475
UniRef100_P70194	Clec4f	0.189285	0.664115	0.734884	0.408036	0.1848	0.285961	-0.153859	0.0224999
UniRef100_Q9JI99	Sgpp1	0.40045	0.660113	0.62161	0.769234	0.0206485	0.740098	0.153898	0.0226912
UniRef100_P97334	Nkx2-3	0.195181	0.208634	0.860321	0.390211	0.654008	0.170709	0.0610973	0.0228198
UniRef100_P32648	Vip	0.737437	0.535741	0.720474	0.0618476	0.00874755	0.342838	-0.282193	0.0229433
UniRef100_Q99LD9	Eif2b2	0.37694	0.451791	0.605258	0.682044	0.130373	0.367597	-0.113093	0.0230251
UniRef100_Q9JMF7	Dolpp1	0.375321	0.784875	0.659602	0.841323	0.492781	0.0593655	0.132396	0.0233218
UniRef100_P28301	Lox	0.713174	0.841838	0.679435	0.440064	0.933628	0.191382	0.0873705	0.0233678
UniRef100_P33435	Mmp13	0.357413	0.520835	0.259724	0.25674	0.0181776	0.422502	-0.25384	0.0233794
UniRef100_Q8CBR3	Fancc	0.0232721	0.377283	0.386633	0.0443118	0.675397	0.81184	-0.46103	0.0235425
UniRef100_P51660	Hsd17b4	0.566071	0.891413	0.0643803	0.887356	0.300167	0.393493	0.090941	0.0235524
UniRef100_P11942	Cd3g	0.668654	0.118101	0.00711409	0.256395	0.0670664	0.296963	-0.532107	0.0236566
UniRef100_O70570	Pigr	0.625403	0.749426	0.0736409	0.117196	0.473583	0.289158	-0.277849	0.0237683
UniRef100_P00015	Cyct	0.422852	0.394171	0.602218	0.659376	0.763407	0.120951	-0.0689222	0.023846
UniRef100_Q922Q4	Pycr2	0.886896	0.121196	0.0458374	0.875532	0.638558	0.0271198	-0.394912	0.0239089
UniRef100_Q8K0A8	Pde6a	0.711555	0.11262	0.546612	0.638887	0.00719564	0.507788	-0.191622	0.0240802
UniRef100_P15949	Klk1b9	0.592022	0.585019	0.345225	0.727809	0.004536	0.647462	-0.217822	0.0241267
UniRef100_P15066	Jund	0.921451	0.686743	0.873892	0.395754	0.0164552	0.00255342	0.285268	0.0243065
UniRef100_Q3UY43	Txnrd3	0.389748	0.512651	0.475598	0.50506	0.000510822	0.109427	0.274625	0.0244594
UniRef100_P35456	Plaur	0.908431	0.631681	0.562947	0.610653	0.176051	0.506053	-0.10112	0.0245151
UniRef100_Q11136	Pepd	0.151016	0.963238	0.120068	0.901033	0.00847782	0.425151	0.3443	0.024689
UniRef100_Q64311	Ntan1	0.398361	0.0903201	0.374224	0.828585	0.173172	0.52548	0.0898021	0.0247066
UniRef100_Q01965	Ly9	0.332938	0.107131	0.715729	0.948355	0.271261	0.254102	-0.0691982	0.0248451
UniRef100_Q08501	Prlr	0.730485	0.124897	0.111641	0.634729	6.7e-05	0.926124	0.623427	0.0251292
UniRef100_Q8CDB0	Mknk2	0.764203	0.615168	0.366845	0.87564	0.580436	0.0126362	-0.164191	0.0256395
UniRef100_P37238	Pparg	0.845583	0.842177	0.599949	0.689796	0.0563619	0.0209316	-0.253665	0.0256442
UniRef100_P06869	Plau	0.438892	0.337556	0.948888	0.177143	0.00168063	0.701388	0.302529	0.0256664
UniRef100_P21300	Akr1b7	0.833789	0.333161	0.827837	0.817648	0.0017128	0.266001	-0.262809	0.025915
UniRef100_P62515	Pou3f4	0.923974	0.971491	0.0880658	0.516198	0.650827	0.280194	0.0797514	0.025961
UniRef100_Q64444	Car4	0.400047	0.190732	0.680702	0.925764	0.00151973	0.626644	0.294219	0.0259941
UniRef100_Q01065	Pde1b	0.618861	0.433684	0.74278	0.535706	0.128634	0.670474	-0.0870125	0.025999
UniRef100_B2RUF0	Ybx2	0.0022173	0.0473032	0.141176	0.551913	0.0662042	0.420428	-0.854686	0.0262093
UniRef100_O55239	Nnmt	0.274752	0.84124	0.225791	0.819762	0.734798	0.203661	0.0720836	0.026286
UniRef100_P16627	Hspa1l	0.0122889	0.443824	0.14538	0.116163	0.885823	0.148743	-0.690519	0.0263523
UniRef100_Q8VBV7	Cops8	0.458769	0.98972	0.631661	0.464666	0.164068	0.565239	0.0930268	0.0264565
UniRef100_Q9CQS8	Sec61b	0.575613	0.753215	0.738686	0.854769	0.159149	0.00620379	-0.15231	0.0265564
UniRef100_P12968	Iapp	0.878748	0.382	0.380016	0.962905	0.217676	0.186115	-0.120357	0.0265588
UniRef100_Q9Z320	Krt27	0.676781	0.662301	0.236074	0.904386	0.401468	0.30123	-0.082901	0.0268299
UniRef100_P49749	Evx2	0.981421	0.959216	0.525765	0.299463	0.850102	0.115294	-0.0869886	0.0269327
UniRef100_Q923D1	Zfp61	0.48368	0.709767	0.894371	0.829492	0.15106	0.44441	-0.0912001	0.0275403
UniRef100_P57759	Erp29	0.94185	0.812001	0.899369	0.480257	0.380946	0.0640731	0.0959147	0.0278778
UniRef100_Q61880	Dmc1	0.745142	0.413421	0.577522	0.613986	0.472993	0.264816	-0.066475	0.0281618
UniRef100_P03958	Ada	0.140951	0.0431287	0.568304	0.778486	7.45e-05	0.474018	0.684434	0.0282004
UniRef100_P35378	Fshr	0.726638	0.628405	0.872971	0.75571	0.114402	0.472876	-0.0931238	0.0282839
UniRef100_Q91YS4	Klc2	0.731959	0.302835	0.51162	0.162724	0.397207	0.284348	0.0861388	0.0286838
UniRef100_Q9WTP3	Spdef	0.97586	0.429387	0.363358	0.784694	0.339099	0.000636589	-0.43913	0.0286964
UniRef100_P31315	Gsx1	0.21759	0.371642	0.408595	0.527538	0.0674679	0.438019	-0.234647	0.0287354
UniRef100_P62873	Gnb1	0.427723	0.275878	0.472017	0.869638	0.498601	0.0491495	0.179643	0.0287364
UniRef100_Q9Y3U8	Rpl36	0.731098	0.230511	0.112853	0.964501	0.382182	0.395688	0.112881	0.0290859
UniRef100_P27808	Mgat1	0.802979	0.244084	0.506953	0.584973	0.205792	0.301633	0.0884645	0.0294088
UniRef100_Q64442	Sord	0.469418	0.135621	0.114852	0.81354	0.000551098	0.13014	0.435457	0.0294136
UniRef100_P19001	Krt19	0.760606	0.556935	0.394209	0.937072	0.290727	0.054915	0.16525	0.029566
UniRef100_P55095	Gcg	0.274578	0.159324	0.949183	0.437232	4.56e-08	0.98994	0.486932	0.0296225
UniRef100_P35383	P2ry2	0.111885	0.340518	0.184685	0.886775	0.000406417	0.240837	0.331842	0.0298152
UniRef100_Q8VCI5	Pex19	0.118903	0.443157	0.524172	0.562811	0.161837	0.0544618	0.174195	0.0300757
UniRef100_Q9WUH2	Lhx9	0.187812	0.634256	0.598254	0.367106	0.225379	0.365117	-0.097564	0.0302019
UniRef100_P56399	Usp5	0.592565	0.516	0.566902	0.853806	0.504072	0.215849	0.101523	0.030229
UniRef100_Q9DBR1	Xrn2	0.394124	0.205742	0.932184	0.698043	0.00908085	0.411629	0.145174	0.0303989
UniRef100_Q9EST8	Nfkbiz	0.61555	0.593766	0.420644	0.818573	0.000131143	0.000232334	-0.50731	0.0311939
UniRef100_P70658	Cxcr4	0.0953977	0.779411	0.89645	0.780101	0.109263	0.497123	0.146535	0.031451
UniRef100_O35386	Phyh	0.462248	0.588802	0.195636	0.820588	0.00342303	0.38054	0.179645	0.031504
UniRef100_P13832	2900073G15Rik	0.664683	0.540008	0.547786	0.987537	0.0708578	0.804278	0.115455	0.031541
UniRef100_P97310	Mcm2	0.668832	0.727593	0.721292	0.646103	0.550236	0.0146645	-0.192921	0.0316381
UniRef100_Q31093	H2-M3	0.089419	0.420557	0.581331	0.552337	0.248754	0.990495	-0.0894703	0.0317051
UniRef100_O35566	Cd151	0.639553	0.438306	0.871369	0.626938	0.122858	0.0557752	0.127477	0.0317933
UniRef100_B2RST7	H2-Oa	0.623206	0.358372	0.372606	0.655544	0.763281	0.0272344	-0.147832	0.0319095
UniRef100_Q9Z2R9	Eif2ak1	0.945346	0.149442	0.488942	0.569257	0.101663	0.408773	0.0877978	0.0322877
UniRef100_Q9CQ62	Decr1	0.888143	0.577499	0.379876	0.969977	0.140094	0.534309	-0.0865366	0.0322879
UniRef100_P70351	Ezh1	0.497564	0.420977	0.836114	0.696393	0.907038	0.131858	0.0612621	0.0325483
UniRef100_Q9CQC9	Sar1b	0.342431	0.544254	0.447365	0.942555	0.0493967	0.387428	0.116374	0.032656
UniRef100_Q3UGC7	Eif3j	0.982785	0.656429	0.523215	0.843548	0.153922	0.362526	0.0611113	0.033019
UniRef100_P54071	Idh2	0.995446	0.88591	0.347944	0.976716	0.196595	0.0301311	-0.184455	0.0332432
UniRef100_O89017	Lgmn	0.66851	0.0988186	0.997522	0.340312	0.0788063	0.711061	-0.163778	0.0332586
UniRef100_Q3UKP4	Ceacam12	0.0375268	0.298805	0.420312	0.384916	2.55e-05	0.120244	-0.818011	0.0332828
UniRef100_P16054	Prkce	0.222266	0.202492	0.548495	0.602878	0.00112482	0.500565	0.240663	0.0333273
UniRef100_Q8R059	Gale	0.281334	0.817967	0.902941	0.977053	0.0326887	0.662319	-0.139142	0.0333939
UniRef100_P48025	Sykb	0.813199	0.395532	0.284706	0.617973	0.179799	0.543394	-0.0926752	0.033494
UniRef100_B1AWD8	Clta	0.81569	0.721192	0.281521	0.367796	0.362689	0.264195	0.0729044	0.0335386
UniRef100_Q9CS42	Prps2	0.277973	0.192616	0.0134643	0.465541	0.409271	0.544854	-0.504682	0.0335602
UniRef100_O35083	Agpat1	0.726833	0.610532	0.318849	0.884967	0.0268067	0.854578	0.156059	0.0335939
UniRef100_B9EJ22	Pms2	0.644224	0.184191	0.641851	0.164048	0.504926	0.18972	0.0837656	0.0337957
UniRef100_O54990	Prom1	0.54385	0.0870643	0.0129336	0.739191	0.00661378	0.540399	-0.440122	0.033856
UniRef100_A2BH40	Arid1a	0.25032	0.821818	0.665842	0.835717	0.519375	0.266208	0.0937183	0.0339635
UniRef100_P49442	Inpp1	0.958744	0.933766	0.362796	0.821529	0.0789905	0.296333	-0.118274	0.0339852
UniRef100_O08600	Endog	0.212182	0.57494	0.744068	0.190775	0.84381	0.0460526	0.221323	0.0343722
UniRef100_Q9R098	Hgfac	0.958465	0.412051	0.168324	0.973938	0.0611185	0.711039	-0.183976	0.0345651
UniRef100_Q9D8B3	Chmp4b	0.530613	0.679356	0.211707	0.917319	0.313175	0.110162	0.163537	0.034636
UniRef100_O70172	Pip4k2a	0.22584	0.587304	0.260138	0.70896	0.743572	0.0149733	-0.285656	0.0350396
UniRef100_Q921H8	Acaa1a	0.351319	0.725024	0.0345831	0.769841	0.264267	0.18189	0.327472	0.0352784
UniRef100_P29758	Oat	0.727395	0.976353	0.500501	0.981445	0.12355	0.0134096	0.268079	0.0352846
UniRef100_P16460	Ass1	0.789394	0.0672008	0.265337	0.626705	0.622866	0.0378625	-0.162823	0.0354119
UniRef100_E9PVP5	Mocs2	0.394277	0.281784	0.253024	0.821236	0.0626668	0.673884	0.192583	0.0354596
UniRef100_Q8BWG8	Arrb1	0.609494	0.833345	0.501165	0.855864	0.600634	0.232852	0.0765221	0.0355261
UniRef100_Q9R1W5	Calcrl	0.459805	0.145282	0.549938	0.320641	0.0713963	0.751233	-0.176561	0.0355679
UniRef100_P48301	Tead2	0.84435	0.288036	0.702923	0.783073	0.28884	0.000776912	-0.21307	0.03617
UniRef100_P23611	Irf8	0.631488	0.878347	0.212479	0.858423	0.632239	0.000171623	-0.303072	0.0362808
UniRef100_Q9WU62	Incenp	0.876104	0.2905	0.62085	0.439506	0.484026	0.000125675	-0.290278	0.0364717
UniRef100_Q61881	Mcm7	0.953479	0.89588	0.355952	0.822627	0.130081	0.000263105	-0.250473	0.0370419
UniRef100_Q9JII6	Akr1a4	0.787059	0.424379	0.189145	0.722688	0.500218	0.210462	0.0753023	0.0370508
UniRef100_Q9EQC1	Hsd3b7	0.763855	0.847749	0.747201	0.444894	0.549187	0.0152533	0.206739	0.0371188
UniRef100_O55028	Bckdk	0.904767	0.392745	0.375179	0.872368	0.629814	0.239735	0.0839313	0.0371965
UniRef100_Q61759	Klk1b21	0.997429	0.918135	0.170022	0.875081	0.00205038	0.33926	-0.179666	0.0372075
UniRef100_P97309	Mesp1	0.742013	0.417735	0.232008	0.826629	0.196487	0.392699	-0.0905891	0.0374266
UniRef100_Q8VHZ7	Imp4	0.313874	0.871347	0.849151	0.926385	0.212384	0.31037	-0.0816381	0.0375785
UniRef100_P11032	Gzma	0.425854	0.0743885	0.0709552	0.108776	4.71e-05	0.84858	-0.651833	0.037976
UniRef100_Q99LV7	Pigx	0.70102	0.658866	0.378114	0.446759	0.799292	0.0245335	0.154363	0.0381093
UniRef100_O70165	Fcna	0.836174	0.816084	0.709756	0.800641	0.00172733	0.0162487	-0.223867	0.0381355
UniRef100_O70157	Top3a	0.826554	0.496424	0.970296	0.963074	0.586052	0.206441	-0.0806224	0.0382247
UniRef100_Q3TY45	Slc5a6	0.582619	0.117829	0.400377	0.60274	0.00164032	0.00263264	0.486162	0.0382298
UniRef100_P55769	Nhp2l1	0.61478	0.945877	0.893616	0.747223	0.378751	0.245412	0.0649901	0.0384472
UniRef100_Q62426	Cstb	0.998073	0.87522	0.884143	0.889213	0.00987787	0.165091	0.152403	0.0390288
UniRef100_Q8C863	Itch	0.676618	0.521858	0.75068	0.306332	0.41593	0.382116	0.078656	0.0392843
UniRef100_P22725	Wnt5a	0.154793	0.340614	0.159333	0.927812	0.0036564	0.827199	0.458608	0.0393933
UniRef100_Q9DBW0	Cyp4v3	0.807391	0.0125356	0.100258	0.909705	0.010762	0.00324458	0.868285	0.0394555
UniRef100_B2RU80	Ptprb	0.246068	0.0181329	0.00511915	0.766699	0.224226	0.35229	0.77742	0.0397388
UniRef100_Q80WU3	Grik5	0.728609	0.316865	0.578644	0.246177	0.282248	0.515974	-0.0716762	0.0398816
UniRef100_E9PYI1	Zfp568	0.393269	0.670527	0.608853	0.204289	0.204735	0.488961	0.0706872	0.0399044
UniRef100_O78196	H2-Eb1	0.713871	0.140572	0.263811	0.374416	0.680993	0.0280761	-0.479072	0.0400539
UniRef100_E9Q3B9	Mgll	0.548516	0.146294	0.412944	0.871682	0.178942	0.356558	-0.132019	0.040148
UniRef100_P13808	Slc4a2	0.778446	0.57569	0.733307	0.979065	0.15754	0.492924	0.100297	0.0401661
UniRef100_Q6P073	Ube2j2	0.199412	0.985355	0.463907	0.653002	0.0612875	0.492474	0.108924	0.0402344
UniRef100_P24369	Ppib	0.980038	0.264679	0.395022	0.777777	0.15672	0.536958	-0.0856205	0.0405016
UniRef100_Q91V14	Slc12a5	0.174593	0.528409	0.211183	0.83859	0.0282642	0.24889	-0.131697	0.0408415
UniRef100_Q6W4W7	Diap2	0.770688	0.238707	0.161493	0.902913	0.0296811	0.585596	0.194509	0.0409521
UniRef100_Q62132	Ptprr	0.125183	0.397398	0.801023	0.845071	0.665862	0.168656	0.0578731	0.0417117
UniRef100_Q9Z1G3	Atp6v1c1	0.311194	0.771835	0.484587	0.68893	0.429901	0.304077	0.0861522	0.0418912
UniRef100_Q8BVP5	Csnk1g2	0.678808	0.984154	0.975067	0.37819	0.240631	0.285685	0.0757613	0.0420323
UniRef100_Q91V78	Cd81	0.968838	0.568052	0.94328	0.1855	0.0383092	0.00611638	-0.247411	0.0421129
UniRef100_Q8CIP4	Mark4	0.846807	0.0820335	0.131783	0.402989	0.128456	0.755949	0.382649	0.0427699
UniRef100_P04919	Slc4a1	0.592778	0.449585	0.505322	0.736971	0.153165	0.761291	-0.156519	0.0430383
UniRef100_Q3UJB0	Sf3b2	0.636959	0.517491	0.538407	0.415386	0.147551	0.586052	0.0792153	0.0432334
UniRef100_O08792	Ebf2	0.914987	0.0527963	0.938528	0.487481	0.494678	0.233138	-0.0785802	0.0434658
UniRef100_Q5SQB4	Tlx3	0.923815	0.157634	0.168274	0.785843	0.0610403	0.718808	-0.183346	0.0435125
UniRef100_P14733	Lmnb1	0.784824	0.665857	0.838855	0.687178	0.0705066	0.293496	-0.0935252	0.0435461
UniRef100_P68431	Hist1h3a	0.503632	0.16669	0.400707	0.163874	0.301211	0.000257403	-0.440443	0.0435767
UniRef100_Q3U2G2	Hspa4	0.416861	0.736486	0.546652	0.868324	0.827309	0.163088	0.0524281	0.043964
UniRef100_Q8QZR1	Tat	0.65262	0.416564	0.0360546	0.914738	0.000697906	0.694187	-0.524687	0.0441225
UniRef100_Q9DAM5	Slc25a19	0.811037	0.302015	0.451576	0.193526	0.213374	0.0414451	0.168704	0.0443635
UniRef100_Q7TSG2	Ctdp1	0.757937	0.837076	0.999498	0.718892	0.409464	0.299374	0.0657707	0.0446428
UniRef100_Q496T0	Mc5r	0.630895	0.675646	0.910619	0.128298	0.98858	0.159938	0.0541034	0.0448285
UniRef100_Q810G3	Ifna14	0.339642	0.418446	0.560536	0.825146	0.147338	0.348133	-0.0701784	0.0448812
UniRef100_Q9DBG6	Rpn2	0.665901	0.386033	0.602732	0.341961	0.0115208	0.00153701	-0.250239	0.044941
UniRef100_Q9DCW4	Etfb	0.246055	0.647762	0.548386	0.444845	0.164757	0.961727	-0.0804683	0.0451628
UniRef100_Q61160	Fadd	0.755483	0.459473	0.396512	0.848263	0.379273	0.109525	0.113579	0.0451786
UniRef100_E9Q604	Itgam	0.802708	0.810418	0.399614	0.395025	0.368279	0.326827	-0.0822691	0.0453895
UniRef100_P14106	C1qb	0.564523	0.734731	0.12672	0.254371	0.616138	0.228921	-0.167489	0.045415
UniRef100_Q9CXH7	Sgol1	0.481785	0.116215	0.725393	0.391691	0.496559	0.262893	-0.0840507	0.0454659
UniRef100_P97371	Psme1	0.584037	0.604975	0.463189	0.831558	0.0544591	0.865778	0.107211	0.0455811
UniRef100_P23204	Ppara	0.757976	0.0719473	0.00328993	0.704086	0.00966132	0.169481	0.663237	0.0456158
UniRef100_O35683	Ndufa1	0.29155	0.861502	0.497649	0.678864	0.105182	0.54857	0.0907839	0.0456284
UniRef100_P04350	Tubb4	0.733565	0.116366	0.576587	0.660566	0.20186	0.502621	-0.102624	0.0456838
UniRef100_Q9QZR5	Hipk2	0.54639	0.0857429	0.248212	0.665927	0.198568	0.587697	0.215558	0.0456975
UniRef100_Q3TXE3	Tyk2	0.912787	0.274546	0.927317	0.60643	0.420064	0.358521	0.0611443	0.0457686
UniRef100_P00520	Abl1	0.977418	0.302779	0.291307	0.640599	0.0247995	0.427976	0.114693	0.0462699
UniRef100_P63087	Ppp1cc	0.43366	0.687416	0.663847	0.957323	0.518186	0.234181	0.0806675	0.0463236
UniRef100_E9PWU7	Kifc3	0.0916405	0.403776	0.393354	0.56704	0.280758	0.644892	0.0736208	0.0468444
UniRef100_P70339	Frat1	0.278831	0.926262	0.120961	0.822195	0.713722	0.00221367	0.24179	0.0469266
UniRef100_P35991	Btk	0.0986308	0.834233	0.594321	0.606314	0.309924	0.463119	-0.0804754	0.0469849
UniRef100_Q61521	Ereg	0.519045	0.0743805	0.543549	0.878338	0.0024077	0.882086	0.531126	0.0469852
UniRef100_P29595	Nedd8	0.692871	0.801742	0.494448	0.518669	0.2685	0.459296	0.0764436	0.0469868
UniRef100_P47857	Pfkm	0.246227	0.844325	0.962771	0.587992	0.358441	0.30962	0.0899946	0.0473417
UniRef100_Q9JJ89	Ccdc86	0.842503	0.1681	0.778601	0.684156	0.0252041	0.668535	0.148861	0.047359
UniRef100_Q3TB24	Dnajb2	0.941872	0.244426	0.629447	0.465278	0.866958	0.0420598	0.173937	0.0477888
UniRef100_Q8BN51	Tk2	0.406704	0.450529	0.85087	0.819714	0.318529	0.0692312	0.155822	0.048128
UniRef100_Q9Z1Q9	Vars	0.56186	0.100598	0.816491	0.662211	0.36861	0.00289075	-0.32792	0.0481336
UniRef100_P43688	Nkx2-6	0.148828	0.0806179	0.493487	0.882791	0.0433749	0.652885	-0.304939	0.0481557
UniRef100_P43267	Sox15	0.999874	0.524503	0.44178	0.211426	0.163919	0.472389	-0.102398	0.0481955
UniRef100_E9QK22	Zfp42	0.353972	0.110208	0.45921	0.0327837	0.660469	0.7091	-0.448328	0.048369
UniRef100_O54951	Sema6b	0.269813	0.775226	0.724527	0.932277	0.187061	0.66622	0.0783136	0.0487182
UniRef100_P35486	Pdha1	0.885	0.579737	0.418608	0.445435	0.49251	0.518849	-0.101066	0.0487379
UniRef100_Q9CXI0	Coq5	0.885625	0.782812	0.399716	0.730287	0.808593	0.0419248	-0.137613	0.0488764
UniRef100_P47746	Cnr1	0.952009	0.731635	0.338541	0.270846	0.155427	0.538311	-0.070112	0.0489982
UniRef100_Q9QUG2	Polk	0.14519	0.623506	0.578579	0.820163	0.357138	0.377444	-0.108889	0.0491552
UniRef100_P11798	Camk2a	0.437064	0.191305	0.889267	0.421707	0.183068	0.578704	-0.0767956	0.0492873
UniRef100_Q62158	Trim27	0.615239	0.146595	0.251461	0.714491	0.84721	0.352159	-0.0723321	0.0493896
UniRef100_Q61176	Arg1	0.163443	0.777051	0.549442	0.437466	0.00710908	0.576578	-0.220331	0.0494458
UniRef100_Q9Z2T1	Kcnk7	0.629072	0.153619	0.373328	0.312926	0.122611	0.644671	-0.235902	0.0494753
UniRef100_P40240	Cd9	0.0914178	0.227541	0.508515	0.444598	0.132985	0.843135	-0.235674	0.0496854
UniRef100_A2AIN6	Cd72	0.332066	0.101404	0.144126	0.143107	0.832103	0.409897	-0.466019	0.0501691
UniRef100_P28235	Gja4	0.502463	0.782181	0.906177	0.393205	0.945478	0.253617	0.0874007	0.0503531
UniRef100_Q9EPR2	Pla2g12a	0.391992	0.47908	0.224219	0.302599	0.5373	0.0933165	-0.0905702	0.0505321
UniRef100_Q9NPA8	Eny2	0.0413526	0.973414	0.155355	0.153951	0.188387	0.643419	0.426969	0.0505564
UniRef100_Q9Z211	Pex11a	0.36958	0.39472	0.00122404	0.396206	0.00089528	0.131692	0.431599	0.0505649
UniRef100_Q9Z2K1	Krt16	0.0323361	0.369726	0.767209	0.0688347	0.913498	0.790878	0.478108	0.0506415
UniRef100_Q61390	Cct6b	0.755136	0.0578498	0.975947	0.380963	0.764646	0.0559219	0.129622	0.0509876
UniRef100_P52430	Pon1	0.900171	0.585206	0.516705	0.265141	0.869009	0.223795	0.0673533	0.0511421
UniRef100_Q61324	Arnt2	0.0191944	0.675769	0.393228	0.512659	0.0348859	0.387682	-0.281587	0.0512476
UniRef100_Q3TLR7	Dtl	0.109063	0.730219	0.00423144	0.669778	0.204733	0.635987	-0.480764	0.0513331
UniRef100_Q9DAK9	Phpt1	0.813254	0.494041	0.425024	0.253657	0.644637	0.00200516	0.209596	0.0513785
UniRef100_Q9D0N7	Chaf1b	0.490094	0.595753	0.504743	0.886173	0.478954	0.0191131	-0.234053	0.0514303
UniRef100_Q9CQR7	Psenen	0.603845	0.986259	0.844904	0.866586	0.137502	0.00607311	0.172101	0.051629
UniRef100_P23440	Pde6b	0.844474	0.249251	0.207886	0.914479	0.719375	0.195159	-0.0655788	0.0517293
UniRef100_P47945	Mt4	0.158634	0.0568544	0.913013	0.0586861	0.15784	0.205815	-0.755378	0.0524423
UniRef100_Q9D1C1	Ube2c	0.552285	0.964357	0.919337	0.334923	0.229261	0.0378882	-0.114764	0.0537296
UniRef100_E9Q4F3	Tshb	0.830195	0.72398	0.747355	0.358735	0.350483	0.500677	-0.0703106	0.0538291
UniRef100_P42859	Htt	0.981916	0.959959	0.842704	0.440314	0.635872	0.194006	0.0894708	0.0541438
UniRef100_Q9Z1S3	Rasgrp1	0.964101	0.273274	0.131348	0.369649	0.0751811	0.556065	-0.18731	0.0546057
UniRef100_Q9R0R1	Mfi2	0.500416	0.20283	0.0259621	0.858213	0.170173	0.312594	-0.395821	0.0546298
UniRef100_Q9ER05	Ctrl	0.830882	0.812269	0.948707	0.134475	0.250011	0.642847	0.375414	0.0546745
UniRef100_O75934	Bcas2	0.486194	0.615079	0.900158	0.275223	0.121711	0.043674	0.145727	0.0547421
UniRef100_Q9JIF0	Prmt1	0.62735	0.72185	0.404735	0.581232	0.18548	0.837827	0.0873539	0.054833
UniRef100_Q9R013	Ctsf	0.430003	0.748137	0.662705	0.636547	0.448643	0.00131833	0.274911	0.0548858
UniRef100_Q9DCT2	Ndufs3	0.717034	0.680516	0.14838	0.948253	0.537488	0.00174876	0.200613	0.0549225
UniRef100_Q9D2V6	Slc34a1	0.246166	0.937986	0.478361	0.229177	0.356447	0.258741	-0.0977742	0.0549872
UniRef100_P43021	Nodal	0.971	0.510294	0.163664	0.567379	0.23172	0.398341	-0.0634238	0.0552563
UniRef100_Q922F4	Tubb6	0.785001	0.294587	0.958808	0.880718	0.206911	0.220878	0.129229	0.0555347
UniRef100_Q9D1C8	Vps28	0.875254	0.722678	0.21145	0.378713	0.0324642	0.0138477	0.161348	0.0555832
UniRef100_E9Q8N8	Slc4a4	0.454695	0.210054	0.0892061	0.837406	0.00510374	0.664686	0.237402	0.0556821
UniRef100_Q8BH74	Nup107	0.186772	0.654609	0.774686	0.875132	0.906945	0.190449	-0.0603952	0.056074
UniRef100_Q9R0P6	Sec11a	0.63323	0.216942	0.815407	0.610177	0.178053	0.862309	-0.0734907	0.0562793
UniRef100_Q920Q8	Ivns1abp	0.675424	0.195989	0.270158	0.591021	0.200735	0.736927	-0.0861378	0.056307
UniRef100_Q3U6I9	Il10ra	0.171765	0.532587	0.880455	0.983603	0.568463	0.186473	-0.0831646	0.0563434
UniRef100_Q9WV54	Asah1	0.767077	0.628194	0.070588	0.428383	0.8108	0.0884923	-0.204864	0.0564218
UniRef100_Q3UWB9	Ugt2b5	0.592612	0.0610078	0.0850979	0.952153	0.00435818	0.995361	0.528889	0.0565171
UniRef100_O70372	Tert	0.480934	0.701846	0.479675	0.26687	0.694345	0.38143	-0.0687116	0.0569347
UniRef100_E9Q986	Ctnnd1	0.60392	0.985979	0.120648	0.550754	0.291775	0.297272	0.0594346	0.0569481
UniRef100_O09112	Dusp8	0.679232	0.949365	0.321169	0.214309	0.0270915	0.986252	0.175415	0.0572263
UniRef100_Q3TLI9	Cmah	0.393357	0.390233	0.868164	0.862226	0.0124441	0.0619381	-0.189024	0.0572344
UniRef100_O88551	Cldn1	0.510658	0.639946	0.817985	0.241357	0.317109	0.315872	-0.0555723	0.0574266
UniRef100_P51450	Rorc	0.30777	0.847742	0.926644	0.686282	1.59e-07	0.0723919	0.439208	0.0574321
UniRef100_Q80UK5	Serpinb9f	0.125814	0.715867	0.459378	0.298093	0.293692	0.502695	0.0679513	0.058324
UniRef100_A2ASZ8	Slc25a25	0.469597	0.562859	0.485846	0.509717	0.117559	0.665621	0.101059	0.0586519
UniRef100_P39039	Mbl1	0.129596	0.697435	0.291425	0.577645	0.0258333	0.898862	-0.234135	0.0587284
UniRef100_Q9WVD5	Slc25a15	0.909608	0.241404	0.253068	0.978146	0.00111664	0.038884	0.187399	0.0589218
UniRef100_P35561	Kcnj2	0.615306	0.668987	0.204688	0.643696	0.105721	0.464458	0.127454	0.0595853
UniRef100_P04187	Gzmb	0.443063	0.555126	0.523022	0.0287435	1.49e-05	0.831581	-0.514779	0.0596885
UniRef100_P97929	Brca2	0.602393	0.946715	0.341883	0.419846	0.331084	0.59525	-0.0724575	0.059784
UniRef100_P56695	Wfs1	0.324045	0.253279	0.0492064	0.735532	0.915616	0.221571	0.377606	0.0598853
UniRef100_O89101	Fgf18	0.825957	0.67349	0.15745	0.365679	0.683642	0.0749564	-0.0894511	0.0602589
UniRef100_Q8BX21	Ttk	0.334166	0.108182	0.129551	0.885309	0.401858	0.666008	-0.258053	0.0603709
UniRef100_P09055	Itgb1	0.681778	0.395046	0.636754	0.355732	0.537801	0.266004	-0.0738705	0.0603919
UniRef100_O35134	Polr1a	0.35277	0.389061	0.738323	0.969834	0.397599	0.414578	-0.0705436	0.0606285
UniRef100_Q8R040	Rpp21	0.859206	0.126518	0.894659	0.180794	0.464957	0.0197688	0.149797	0.060783
UniRef100_P06804	Tnf	0.207648	0.727208	0.185101	0.955271	0.115692	0.00346131	-0.18786	0.0613276
UniRef100_Q60867	Neurod1	0.262542	0.244674	0.420683	0.891509	0.0178374	0.512168	-0.161391	0.0613467
UniRef100_Q9QXK8	Nmu	0.787921	0.545547	0.815705	0.0927516	0.00999372	0.903648	-0.340033	0.0613967
UniRef100_Q8JZQ9	Eif3b	0.367665	0.577794	0.560083	0.43794	0.645851	0.312879	-0.070266	0.0614426
UniRef100_O88907	Pias1	0.434154	0.48804	0.466872	0.58218	0.120902	0.859759	0.14244	0.0615709
UniRef100_P48299	Edn3	0.209027	0.915877	0.0928623	0.515559	0.0558605	0.533806	0.371874	0.0617382
UniRef100_Q64674	Srm	0.799713	0.591942	0.129977	0.953259	0.983898	0.0245859	-0.218065	0.0618806
UniRef100_A8DUK4	Hbb-b1	0.262401	0.330808	0.115881	0.0194336	0.00289981	0.0509466	-0.550267	0.0619869
UniRef100_A2A9Z6	Hoxb9	0.918915	0.726635	0.276174	0.780445	0.295541	0.299659	0.111149	0.0619947
UniRef100_P42580	Nkx1-2	0.335018	0.274738	0.260339	0.434902	0.350399	0.965772	-0.173198	0.0619951
UniRef100_O70324	Slc16a2	0.358458	0.108084	0.316386	0.809375	0.0644111	0.820113	-0.16264	0.0621442
UniRef100_Q9D1I5	Mcee	0.902928	0.446149	0.955644	0.997602	0.368763	0.408047	0.092258	0.0621571
UniRef100_P63276	Rps17	0.199548	0.789421	0.396543	0.78029	0.812678	0.150938	0.0760501	0.0622149
UniRef100_P36552	Cpox	0.875607	0.473729	0.715967	0.355813	0.429552	0.326272	-0.0562809	0.062297
UniRef100_O35166	Gosr2	0.792575	0.685077	0.496503	0.801393	0.0961581	0.807083	0.109104	0.0623197
UniRef100_P50149	Gnat2	0.420691	0.762138	0.543106	0.727114	0.0180516	0.54653	-0.148604	0.0623282
UniRef100_P20334	Tnfrsf9	0.869068	0.906716	0.401002	0.841556	0.239277	0.378844	-0.0575265	0.0626602
UniRef100_O14950	Myl12b	0.664683	0.0221357	0.547786	0.986591	0.00552675	0.00977377	0.404109	0.0627979
UniRef100_Q5QNW6	Hist2h2bb	0.65967	0.585445	0.752729	0.353944	0.293621	0.000233974	-0.21345	0.0629998
UniRef100_P97351	Rps3a	0.770593	0.307915	0.433797	0.315816	0.178399	0.673287	0.0847921	0.0632569
UniRef100_Q5BKQ4	Pnliprp1	0.52325	0.980607	0.975088	0.331084	0.15754	0.981361	0.448556	0.0632586
UniRef100_Q9Z2M7	Pmm2	0.549766	0.998978	0.889856	0.558498	0.183631	0.509507	0.0703084	0.0634927
UniRef100_Q99LC3	Ndufa10	0.612895	0.183859	0.734598	0.432931	0.36117	0.896255	0.0753131	0.0635015
UniRef100_Q8CIF4	Btd	0.778436	0.977078	0.218734	0.891985	0.911926	0.0208261	0.154838	0.063535
UniRef100_Q3UM18	Lsg1	0.639042	0.132318	0.54226	0.814555	0.348606	0.269763	0.0748486	0.0637167
UniRef100_Q8BJF9	Chmp2b	0.456623	0.237449	0.724169	0.832325	0.0427165	0.749069	0.119287	0.0639545
UniRef100_B9EHF7	Gata4	0.653874	0.584231	0.747534	0.897819	0.702271	0.299101	0.0818463	0.0640899
UniRef100_Q3USK4	Sos1	0.467612	0.834082	0.957612	0.325332	0.480927	0.427517	0.0733203	0.0643358
UniRef100_O55208	Figla	0.332506	0.626316	0.905994	0.65157	0.427328	0.24961	-0.0664262	0.0643464
UniRef100_P10601	Ppy	0.739902	0.410438	0.650526	0.33851	0.538133	0.221719	-0.16088	0.0649046
UniRef100_P59598	Asxl1	0.666351	0.817213	0.656003	0.770566	0.175778	0.548777	0.0926205	0.0649714
UniRef100_E9QKD9	Gtf2h1	0.935493	0.49044	0.411156	0.575693	0.0142168	0.960876	0.141344	0.0653039
UniRef100_A2AMV1	Mrto4	0.938523	0.533667	0.989567	0.368212	0.953849	0.190682	-0.107558	0.065416
UniRef100_Q9QXH4	Itgax	0.0827445	0.95423	0.854731	0.723053	0.914372	0.29592	0.0513232	0.0654191
UniRef100_D3YZ08	Terf2	0.560729	0.929685	0.329646	0.207472	0.0970498	0.951009	0.142185	0.0654934
UniRef100_Q6P549	Inppl1	0.582613	0.465883	0.771045	0.722508	0.590809	0.00187434	-0.153459	0.065659
UniRef100_P62140	Ppp1cb	0.337199	0.948483	0.247342	0.864014	0.252058	0.882044	-0.0966297	0.0659135
UniRef100_P23299	Kcne1	0.917136	0.954833	0.219221	0.731546	0.260312	0.392172	-0.0526895	0.066062
UniRef100_Q9R1A8	Rfwd2	0.933855	0.983142	0.365078	0.779081	0.116106	0.421713	0.0646039	0.066204
UniRef100_O89023	Tpp1	0.602533	0.224552	0.716872	0.760683	0.67166	0.0947462	-0.0806611	0.066279
UniRef100_Q01776	Gnrhr	0.24786	0.513066	0.740399	0.776944	0.0568446	0.512448	-0.0987755	0.0662991
UniRef100_E9Q569	Zfp398	0.848046	0.896661	0.10443	0.843876	0.0954086	0.378331	0.078906	0.0663866
UniRef100_O54785	Limk2	0.825169	0.546666	0.546137	0.886122	0.617202	0.14699	0.0725245	0.0665571
UniRef100_Q60805	Mertk	0.251714	0.173279	0.739683	0.396001	0.229017	0.570827	0.0859098	0.0670187
UniRef100_B9EKF4	Zfp777	0.277067	0.356232	0.198879	0.85795	0.0998854	0.467093	0.0752962	0.0673001
UniRef100_Q91WQ3	Yars	0.784792	0.782309	0.550992	0.629658	0.830605	0.228208	-0.0664767	0.0673305
UniRef100_Q8C1C1	Psapl1	0.677234	0.266465	0.824615	0.216155	0.960732	0.27647	0.0574996	0.0674906
UniRef100_Q9DCM4	Dnalc4	0.872196	0.237992	0.742491	0.651662	0.791464	0.177129	-0.0693762	0.0676819
UniRef100_Q99J56	Derl1	0.475318	0.428257	0.791615	0.802592	0.133576	0.610842	0.0772975	0.0677344
UniRef100_E9PXF5	Sirt2	0.713044	0.382503	0.638341	0.738808	0.356135	0.47404	0.0747487	0.068236
UniRef100_A3KG01	Ephb2	0.943868	0.808019	0.420064	0.78409	0.189465	0.379147	-0.0617201	0.0686393
UniRef100_Q9CR80	Fam32a	0.299074	0.799342	0.770128	0.609386	0.773624	0.204911	0.0577402	0.0686814
UniRef100_P11725	Otc	0.536557	0.794928	0.343099	0.815391	0.0168278	0.615149	0.219642	0.0689045
UniRef100_P19639	Gstm3	0.484349	0.281121	0.810033	0.0652597	0.000912608	0.785953	-0.334999	0.0689939
UniRef100_A2A4Q4	Brca1	0.528478	0.285952	0.252632	0.464764	0.452651	0.272755	-0.060531	0.0691783
UniRef100_Q91Z96	Bmp2k	0.267468	0.0246416	0.436523	0.442835	0.0118196	0.569022	0.588353	0.0692008
UniRef100_Q8C725	Fastk	0.771025	0.3501	0.815237	0.70215	0.83831	0.196523	0.0700561	0.0692182
UniRef100_Q61982	Notch3	0.261255	0.590784	0.638924	0.261935	0.590329	0.236992	-0.0580373	0.069413
UniRef100_Q3UHJ0	Aak1	0.586058	0.720343	0.423332	0.961283	0.0298091	0.510575	0.113324	0.0695249
UniRef100_Q9CQD0	Rpl39l	0.434626	0.360372	0.443158	0.00940054	0.432206	0.856936	0.665245	0.0699427
UniRef100_Q09XV5	Chd8	0.74105	0.984546	0.850554	0.440131	0.996806	0.141962	0.0558714	0.0700657
UniRef100_Q3UYP2	Pcyox1	0.589138	0.229617	0.955165	0.940545	0.563947	0.173581	0.0968367	0.0700682
UniRef100_P52946	Pdx1	0.926227	0.824561	0.470244	0.110984	0.0272304	0.514313	-0.198063	0.0703384
UniRef100_Q9D142	Nudt14	0.87462	0.570752	0.413853	0.657993	0.697194	0.0300565	0.141665	0.0704674
UniRef100_Q99J45	Nrbp1	0.354596	0.804028	0.563754	0.601521	0.406104	0.10274	0.10611	0.0706132
UniRef100_O89110	Casp8	0.983355	0.95	0.458522	0.668569	0.724234	0.0144147	-0.181426	0.0706663
UniRef100_Q3V188	Endou	0.428269	0.591363	0.554209	0.914874	0.828391	0.224768	-0.0606065	0.0707347
UniRef100_Q05928	Btc	0.184731	0.203541	0.522682	0.628452	0.00247812	0.594532	0.163768	0.070767
UniRef100_Q9Z1B5	Mad2l1	0.437804	0.390865	0.691064	0.778731	0.628604	0.00461542	-0.305287	0.0710406
UniRef100_P19137	Lama1	0.362828	0.343184	0.782642	0.386292	0.988389	0.110111	-0.0756707	0.0714055
UniRef100_Q6PD10	Ip6k1	0.43082	0.647904	0.308298	0.641875	0.710262	0.0608384	0.140945	0.071506
UniRef100_Q9CQ75	Ndufa2	0.65584	0.872352	0.140457	0.996702	0.422901	0.0133472	0.146891	0.0715646
UniRef100_Q3UNC6	Slc27a5	0.599194	0.578074	0.912794	0.320757	0.0652798	0.625842	-0.115212	0.0716182
UniRef100_P11352	Gpx1	0.664021	0.357715	0.600233	0.314994	0.94362	0.101575	-0.0749987	0.0721618
UniRef100_P32507	Pvrl2	0.941246	0.178114	0.703103	0.951579	0.16254	0.622551	0.0966867	0.0725483
UniRef100_P56382	Atp5e	0.923473	0.609527	0.0840063	0.909963	0.357358	0.909212	0.0840359	0.0727667
UniRef100_P41245	Mmp9	0.087815	0.595248	0.195244	0.135807	0.294629	0.456095	-0.60856	0.0728089
UniRef100_Q61771	Kif3b	0.274434	0.82406	0.307913	0.981347	0.342901	0.358526	0.0636015	0.0735975
UniRef100_Q99JB0	Klf7	0.66169	0.685708	0.916342	0.480287	0.284336	0.753822	0.0950447	0.0738372
UniRef100_P05480	Src	0.401339	0.642196	0.621873	0.569799	0.487996	0.335734	0.0525679	0.0739045
UniRef100_P25119	Tnfrsf1b	0.655733	0.338769	0.715732	0.642922	0.0215069	0.434312	-0.129211	0.0744261
UniRef100_O09131	Gsto1	0.993638	0.705741	0.305038	0.822481	0.00177255	1.71e-05	0.253182	0.0755794
UniRef100_Q03142	Fgfr4	0.584088	0.813712	0.613542	0.717054	0.524586	0.357179	0.0603052	0.075609
UniRef100_Q99MP8	Brap	0.99308	0.220817	0.428915	0.943461	0.060531	0.487439	0.0754151	0.0756347
UniRef100_Q91YR1	Twf1	0.684447	0.129577	0.00859697	0.273994	0.563098	0.109697	-0.452971	0.0756539
UniRef100_P70190	Capza3	0.479498	0.520471	0.33396	0.993757	0.279753	0.624607	-0.0744209	0.0756988
UniRef100_P28231	Gjb3	0.594924	0.351941	0.962854	0.0436319	0.00603917	0.00182279	0.377239	0.0758012
UniRef100_P48615	Wnt11	0.749292	0.446039	0.97792	0.862303	0.232244	0.501721	-0.0540103	0.0758587
UniRef100_A2ADU2	Eda	0.631355	0.217918	0.270507	0.648392	0.00993468	0.855422	0.180708	0.076038
UniRef100_Q9CR35	Ctrb1	0.82487	0.890076	0.941025	0.199023	0.282051	0.702103	0.311151	0.0760656
UniRef100_P15209	Ntrk2	0.216276	0.64423	0.945021	0.555925	0.438757	0.270457	-0.0491446	0.0761757
UniRef100_Q9EPX5	Fbxl12	0.0419269	0.109953	0.582037	0.650148	0.339218	0.0323406	0.375146	0.0761817
UniRef100_P63046	Sult4a1	0.368872	0.606386	0.696582	0.571337	0.00147784	0.0811933	-0.172079	0.0762162
UniRef100_Q9WVS6	Park2	0.0193038	0.187443	0.0862453	0.98989	0.447687	0.389216	0.45936	0.076525
UniRef100_Q61133	Gstt2	0.524156	0.464451	0.389268	0.316639	0.228153	0.686961	-0.0772015	0.0769349
UniRef100_P97501	Fmo3	0.209089	0.547017	0.825424	0.340677	0.0526747	0.600734	-0.158948	0.0769663
UniRef100_P12787	Cox5a	0.52605	0.299205	0.758558	0.929599	0.269794	0.429061	0.0690949	0.0770514
UniRef100_Q99PL6	Ubxn6	0.631905	0.401715	0.137083	0.753922	0.482631	0.00434294	0.212106	0.0770971
UniRef100_Q61337	Bad	0.487205	0.606429	0.542322	0.639478	0.43048	0.508773	0.0882541	0.0771835
UniRef100_P20491	Fcer1g	0.466523	0.379236	0.268736	0.668097	0.945716	0.226403	-0.0854397	0.0772612
UniRef100_Q921V5	Mgat2	0.520187	0.954846	0.613233	0.532393	0.094667	0.725173	0.111067	0.0783007
UniRef100_Q9CQZ6	Ndufb3	0.692538	0.610022	0.0443854	0.751928	0.461492	0.261907	0.170235	0.0785103
UniRef100_B2RRQ1	Accn1	0.242352	0.300494	0.792737	0.479135	0.949822	0.323223	0.0478156	0.0787282
UniRef100_Q64373	Bcl2l1	0.815289	0.564901	0.409506	0.927816	0.000844653	0.220512	0.16832	0.0788504
UniRef100_Q8R0P8	Abhd8	0.537682	0.873984	0.290784	0.576201	0.86773	0.00172426	-0.146625	0.0788848
UniRef100_Q62270	Srms	0.0224127	0.437175	0.458852	0.997149	0.0819259	0.542084	-0.369214	0.0788881
UniRef100_Q8CHW4	Eif2b5	0.344999	0.474268	0.25414	0.643891	0.42438	0.397898	0.0903149	0.0790144
UniRef100_P55086	F2rl1	0.920036	0.475193	0.696058	0.499902	0.0010988	0.537343	0.149866	0.0791687
UniRef100_Q9R0Y5	Ak1	0.0476759	0.895398	0.278417	0.383421	0.194648	0.578778	0.357395	0.0791879
UniRef100_Q9D3D9	Atp5d	0.809792	0.712281	0.911902	0.533205	0.511787	0.105807	0.106604	0.0793491
UniRef100_P00756	Klk1b3	0.186166	0.889933	0.570516	0.130737	0.125178	0.707575	0.24784	0.0794852
UniRef100_Q5XJV5	Ncoa6	0.497693	0.602015	0.597395	0.260919	0.11143	0.72382	0.137071	0.0795199
UniRef100_Q9WTK7	Stk11	0.246719	0.296794	0.469009	0.285093	0.453298	0.322519	-0.0671596	0.0799417
UniRef100_Q6P5E6	Gga2	0.393427	0.914298	0.112263	0.275004	0.108439	0.00575114	-0.318847	0.0800449
UniRef100_P48985	Atoh1	0.451897	0.351347	0.3993	0.897413	0.390717	0.372933	-0.0637454	0.0801834
UniRef100_Q9WVK4	Ehd1	0.0662487	0.884512	0.468091	0.492913	0.506721	0.441846	0.0778795	0.0803206
UniRef100_P52787	Gif	0.204496	0.0198508	0.768035	0.035117	0.33869	0.230624	-0.563896	0.0804641
UniRef100_O09114	Ptgds	0.415606	0.919907	0.332739	0.343575	0.0780733	0.327823	-0.0973495	0.0806664
UniRef100_Q8BY71	Hat1	0.569079	0.281086	0.0543934	0.66129	0.496865	0.308671	-0.273789	0.0809305
UniRef100_P49183	Dnase1	0.520175	0.540402	0.340081	0.805933	0.694874	0.23269	-0.0498556	0.0810491
UniRef100_Q08535	Sct	0.178191	0.515033	0.285321	0.809931	0.987559	0.345141	0.215093	0.0810493
UniRef100_P28825	Mep1a	0.622136	0.958486	0.674515	0.966906	1.64e-05	0.0051036	0.260428	0.081473
UniRef100_Q03137	Epha4	0.876451	0.280256	0.774928	0.490063	0.638413	0.304224	0.0679843	0.0816298
UniRef100_Q3UW00	Isg20	0.669291	0.00578925	0.100592	0.970573	0.133109	0.390105	-0.858263	0.0818128
UniRef100_Q9CZH3	Psmg3	0.796999	0.334215	0.433982	0.639399	0.251128	0.785919	-0.0892325	0.0820458
UniRef100_P61028	Rab8b	0.947784	0.3208	0.101304	0.948414	0.376116	0.0230514	-0.21311	0.0823814
UniRef100_P97459	Npas1	0.014604	0.0132299	0.308595	0.339022	0.0970196	0.659303	0.677072	0.0824386
UniRef100_Q3UHZ2	Arntl	0.981999	0.755513	0.0264238	0.482896	0.108189	0.115743	-0.280735	0.0825297
UniRef100_P70404	Idh3g	0.169807	0.700401	0.137392	0.907844	0.887404	0.00801646	0.227503	0.0828717
UniRef100_Q8R1G2	Cmbl	0.872864	0.518193	0.140634	0.895512	0.713736	0.42566	0.108632	0.0830499
UniRef100_Q9D7I5	Lhpp	0.265833	0.45336	0.65052	0.706403	0.52018	0.00336544	0.270783	0.0832646
UniRef100_P47758	Srprb	0.751918	0.954014	0.58329	0.870513	0.428775	0.221395	-0.072145	0.0837619
UniRef100_P33033	Mc3r	0.696387	0.179159	0.197048	0.812496	0.814044	0.381035	0.0601972	0.0840829
UniRef100_E9Q4D0	Pcsk6	0.357255	0.971188	0.997345	0.633775	0.045771	0.617578	0.159827	0.0841379
UniRef100_Q9QYH6	Maged1	0.501687	0.127997	0.611003	0.413949	0.654236	0.000587044	-0.476464	0.0841416
UniRef100_Q5U3M4	Tdg	0.896785	0.721715	0.927779	0.616138	0.352095	0.460024	0.0603239	0.0842174
UniRef100_P55849-2	Dsc1	0.127093	0.147934	0.594341	0.625693	0.913351	0.180871	-0.053969	0.0842406
UniRef100_Q3UF16	P4ha1	0.627153	0.276701	0.311691	0.0336791	0.226524	0.475585	-0.316172	0.0845063
UniRef100_O35409	Folh1	0.33964	0.168836	0.676155	0.0104092	0.567544	0.191649	-0.560089	0.0847291
UniRef100_O88495	Gpr50	0.945827	0.154089	0.443153	0.0852792	0.00561157	0.357364	-0.351284	0.0849016
UniRef100_P16381	D1Pas1	0.406388	0.122332	0.132791	0.424994	0.404	0.783737	0.531097	0.0849383
UniRef100_P00375	Dhfr	0.519509	0.624016	0.249204	0.313014	0.715214	0.510527	0.0647732	0.0850696
UniRef100_P52795	Efnb1	0.202282	0.912701	0.024064	0.426161	0.00236995	0.00316398	0.251381	0.0854922
UniRef100_P23812	Hoxd12	0.606765	0.458526	0.924511	0.458628	0.623119	0.346559	-0.0615849	0.0856527
UniRef100_P17809	Slc2a1	0.332252	0.569933	0.125462	0.940548	0.365403	0.343786	0.0806632	0.0857725
UniRef100_O35445	Rnf5	0.974872	0.206787	0.814073	0.870055	0.209753	0.0147636	0.142837	0.0859421
UniRef100_Q922U2	Krt5	0.331344	0.63512	0.588161	0.381165	0.344046	0.426998	-0.0738986	0.0862534
UniRef100_Q80ZM5	H1fx	0.0468645	0.348193	0.908663	0.0983155	0.473564	0.24371	-0.428449	0.0866995
UniRef100_Q99N15	Hsd17b10	0.609814	0.603386	0.116922	0.930318	0.956513	0.266957	0.147706	0.0867685
UniRef100_Q99JF5	Mvd	0.603925	0.315914	0.817932	0.453543	0.118832	0.627784	0.1326	0.0867719
UniRef100_Q9EQT3	Rhou	0.657517	0.508474	0.350519	0.812952	0.560132	0.112778	0.114797	0.0871787
UniRef100_P55271	Cdkn2b	0.103905	0.325198	0.890615	0.412081	0.00282042	0.0657425	0.238987	0.0875103
UniRef100_P97287	Mcl1	0.365992	0.488986	0.978993	0.51854	0.00276421	0.755381	0.153367	0.0878176
UniRef100_Q91XL3	Uxs1	0.440742	0.253085	0.216996	0.924949	0.676239	0.309285	-0.0590654	0.0880105
UniRef100_Q9QUK3	Cln8	0.94697	0.131467	0.102654	0.434124	0.107631	0.403347	0.375877	0.0880505
UniRef100_P97299	Sfrp2	0.395354	0.360021	0.357515	0.0574619	0.000252046	0.393951	0.411138	0.0881132
UniRef100_A7MCT8	Sirt1	0.0306566	0.230426	0.00915613	0.754096	0.603042	0.220887	0.627203	0.0881874
UniRef100_Q9QWG7	Sult1b1	0.281213	0.438622	0.296474	0.975365	0.0116963	0.641915	0.177689	0.0881982
UniRef100_Q8VIC6	Vmn1r51	0.497982	0.204533	0.218793	0.600073	0.266795	0.460777	-0.0487328	0.08821
UniRef100_Q8K268	Abcf3	0.536001	0.804987	0.868826	0.612316	0.0557274	0.458667	0.0941263	0.0883635
UniRef100_B1ATI7	Aldh3a1	0.569627	0.82877	0.132544	0.0034457	0.508773	0.111666	-0.560785	0.088681
UniRef100_Q9QZF2	Gpc1	0.606058	0.54722	0.694712	0.74625	0.381864	0.0474727	-0.15875	0.0887089
UniRef100_Q9WUA2	Farsb	0.907558	0.0923617	0.614576	0.826227	0.501476	0.155673	-0.114621	0.0888434
UniRef100_Q3TSQ8	Bcan	1	0.312236	0.801782	0.124032	0.00870048	0.677477	-0.180342	0.0890711
UniRef100_D3YWT3	Tcf7l2	0.875028	0.430053	0.643889	0.650729	0.0823304	0.370449	0.0819821	0.0891735
UniRef100_Q91YT0	Ndufv1	0.656773	0.797918	0.998937	0.895007	0.649712	0.205662	0.0627907	0.0892802
UniRef100_Q8BMK4	Ckap4	0.658886	0.0828879	0.000604255	0.799716	0.00213473	0.569394	-0.730935	0.0895072
UniRef100_Q8C3J2	St6galnac4	0.968377	0.27266	0.559869	0.594622	0.47825	0.0129073	-0.199426	0.0896228
UniRef100_O88621	Foxh1	0.543746	0.25424	0.934843	0.0772975	0.144789	0.653375	-0.255218	0.090029
UniRef100_O70342	Npy5r	0.0892294	0.806678	0.078753	0.452463	0.306797	0.357868	-0.359763	0.090235
UniRef100_O54754	Aox1	0.900913	0.113636	0.236852	0.166953	0.798484	0.353556	0.315065	0.0907454
UniRef100_E9QNX9	Igf1r	0.316375	0.903547	0.0510182	0.731832	0.36255	0.688988	0.195749	0.0908633
UniRef100_Q8BQ97	Sstr4	0.882295	0.692137	0.665363	0.22539	0.079513	0.995248	-0.116961	0.0910773
UniRef100_O88713	Klrg1	0.77099	0.62291	0.442553	0.621491	0.743705	0.280256	-0.0542891	0.0912142
UniRef100_P01586	Il3	0.537343	0.934288	0.58595	0.368452	0.425424	0.458375	-0.0881938	0.0912486
UniRef100_Q04891	Sox13	0.821533	0.208993	0.487967	0.230351	0.279312	0.0167137	0.187766	0.0913038
UniRef100_Q8BP18	Zfp101	0.797384	0.934288	0.0581782	0.753936	0.422042	0.058416	-0.181057	0.0916492
UniRef100_Q9JJN6	Ctnnbip1	0.868863	0.325947	0.687212	0.716979	0.667689	0.071519	-0.111734	0.0917482
UniRef100_O88968	Tcn2	0.0340716	0.967945	0.0373016	0.771433	0.554072	0.184066	0.358412	0.0919133
UniRef100_E9PXB7	Nedd4l	0.87817	0.927433	0.711898	0.831199	0.699454	0.240479	-0.0610174	0.0923307
UniRef100_P49764	Pgf	0.281754	0.189724	0.615847	0.2665	0.114323	0.476484	-0.0919151	0.0924889
UniRef100_O08605	Mknk1	0.290582	0.702817	0.83695	0.144689	0.711728	0.164745	0.152545	0.0926355
UniRef100_P20352	F3	0.311168	0.636295	0.505693	0.220033	0.000972678	0.67666	0.239039	0.0931701
UniRef100_Q3UVL6	Homer1	0.0414534	0.256859	0.336222	0.762593	0.027377	0.943217	0.490913	0.093263
UniRef100_Q8CFZ4	Gpc3	0.211577	0.979874	0.33978	0.386705	0.0750899	0.512162	0.172055	0.0937039
UniRef100_Q8CIN4	Pak2	0.731644	0.961952	0.568353	0.7373	0.255133	0.729459	-0.0693043	0.0941532
UniRef100_P09240	Cck	0.0127905	0.630174	0.25959	0.343933	4.24e-08	0.00212693	0.756807	0.0942462
UniRef100_E9PX62	Hdac7	0.254733	0.828981	0.217778	0.459138	0.337203	0.0018083	-0.154395	0.0943164
UniRef100_Q6ZPT1	Klhl9	0.509541	0.556154	0.947584	0.746654	0.0216084	0.540118	-0.119286	0.094431
UniRef100_Q3V2P1	Gzmd	0.231119	0.485678	0.566317	0.26001	0.225524	0.460561	0.0516737	0.0944322
UniRef100_P24638	Acp2	0.580552	0.552267	0.795508	0.476548	0.2578	0.896182	0.0777472	0.0945698
UniRef100_Q922J3	Clip1	0.677598	0.0590646	0.398923	0.483127	0.269516	0.460131	0.0652182	0.0947056
UniRef100_P70425	Rit2	0.0893294	0.217522	0.0943266	0.858384	0.452764	0.748668	0.393156	0.0948462
UniRef100_P23336	Ggta1	0.0195434	0.934087	0.0996329	0.408772	0.601607	0.483893	-0.34483	0.0955804
UniRef100_Q9QYL7	Abt1	0.811394	0.992655	0.469232	0.935457	0.452775	0.437029	0.0663682	0.0956528
UniRef100_Q9ER58	Spock2	0.498404	0.768996	0.72179	0.258778	0.954921	0.233672	0.0598746	0.0960261
UniRef100_E9PXS4	Ptp4a3	0.43918	0.633219	0.0624822	0.54029	0.246794	0.727724	-0.28607	0.0962775
UniRef100_A2APR1	Pla2g2c	0.476051	0.897694	0.767177	0.793281	0.24669	0.785678	-0.0687398	0.0963857
UniRef100_P97794	Kcnj8	0.252559	0.0528703	0.0818803	0.83684	0.817133	0.683583	0.446627	0.0968748
UniRef100_Q8BHI7	Elovl5	0.919227	0.478212	0.350957	0.761909	0.736154	0.0447207	-0.154367	0.0970215
UniRef100_B7ZNK8	Pex7	0.525956	0.561474	0.873417	0.804661	0.833248	0.0628526	0.127565	0.0973107
UniRef100_Q0VBT1	Wnt8a	0.768112	0.127795	0.538345	0.882257	0.462972	0.349106	-0.0637081	0.0978945
UniRef100_A2AI57	Trpm7	0.22929	0.238129	0.0134803	0.764608	0.613143	0.59366	0.478584	0.0979053
UniRef100_E9Q8S5	Mast3	0.216707	0.0940649	0.0115393	0.957088	0.460359	0.357819	0.525771	0.0980281
UniRef100_O08747	Unc5c	0.35882	0.00766918	0.0901729	0.929119	0.528236	0.247029	-0.668895	0.0984015
UniRef100_A2AK33	Ralgds	0.896551	0.804234	0.450018	0.690574	0.249532	0.483437	0.0750462	0.0987936
UniRef100_E9QNN9	Gcfc1	0.796602	0.348668	0.468816	0.747047	0.295142	0.532347	0.0590881	0.0988338
UniRef100_Q8BGE6	Atg4b	0.388857	0.926166	0.863883	0.410522	0.0652915	0.986202	0.107608	0.0992746
UniRef100_Q9WUA3	Pfkp	0.219526	0.881568	0.825219	0.902762	0.0410484	0.694432	0.12331	0.0993321
UniRef100_Q9Z1P4	Lgr5	0.028093	0.452718	0.765149	0.86531	0.00964129	0.490416	0.377009	0.0995167
UniRef100_P47955	Rplp1	0.531549	0.17995	0.318049	0.846352	0.558052	0.308271	0.0540841	0.100278
UniRef100_P97950	Rab33a	0.936569	0.956323	0.399212	0.978022	0.658621	0.0180148	0.223391	0.100342
UniRef100_P33534	Oprk1	0.19028	0.048435	0.0295753	0.727411	0.698137	0.773992	0.607449	0.100346
UniRef100_Q9DBH0	Wwp2	0.93067	0.685076	0.957546	0.538148	0.289818	0.0465276	0.118647	0.100487
UniRef100_Q62424	Hoxa13	0.412153	0.525782	0.297478	0.117594	0.000659677	0.363351	0.318739	0.100571
UniRef100_Q8K4K2	Trib3	0.0386766	0.118013	0.0238002	0.677481	0.0298345	0.353351	0.579795	0.100575
UniRef100_O08528	Hk2	0.827318	0.48934	0.539394	0.294835	0.103663	0.00121068	-0.38602	0.101005
UniRef100_Q61017	Gngt2	0.0648848	0.610251	0.585968	0.94922	0.672495	0.0634132	0.170455	0.101687
UniRef100_P97816	S100g	4.85e-05	0.989517	0.121031	0.25509	2.92e-08	0.0011944	-1.14491	0.10206
UniRef100_Q8CA06	Hcls1	0.359082	0.00833793	0.00107095	0.537629	0.44869	0.550732	-0.977141	0.102069
UniRef100_Q64519	Sdc3	0.727008	0.910823	0.844376	0.335377	0.287673	0.476157	0.0462557	0.102216
UniRef100_Q78DX7	Ros1	0.473045	0.984416	0.225599	0.848407	0.435999	0.363806	-0.0762439	0.10246
UniRef100_Q9R210	Tcfeb	0.114975	0.0582843	0.777648	0.670117	0.0452173	0.970491	0.37471	0.102519
UniRef100_P23275	Olfr15	0.710307	0.734514	0.737747	0.973271	0.612237	0.315542	-0.0619006	0.102546
UniRef100_Q9JK92	Hspb8	0.448253	0.522207	0.82479	0.191231	0.0704056	0.547001	0.102633	0.103134
UniRef100_Q9WVM8	Aadat	0.891054	0.952751	0.534597	0.862665	0.0970437	0.712213	-0.0772032	0.103168
UniRef100_P28651	Car8	0.831755	0.780068	0.47209	0.880594	0.531313	0.339216	-0.0489773	0.103273
UniRef100_O09039	Sh2b3	0.573881	0.636049	0.573071	0.686803	0.785335	0.420002	0.0709011	0.103877
UniRef100_Q3UW79	Ptpn14	0.758296	0.485051	0.920207	0.405469	0.953599	0.0529141	-0.0702681	0.104162
UniRef100_E9PUW0	Sox6	0.776839	0.23824	0.0756763	0.515724	0.0134749	0.929982	0.199501	0.104637
UniRef100_Q8JZR6	Slc4a8	0.52346	0.0128494	0.280038	0.653619	0.138929	0.0950275	-0.560817	0.105008
UniRef100_P00329	Adh1	0.655505	0.0154289	0.629211	0.326165	0.0173037	0.00289435	0.665044	0.105083
UniRef100_Q9ERS2	Ndufa13	0.654605	0.545278	0.71392	0.868007	0.275498	0.573817	0.0609058	0.105158
UniRef100_A2NTK1	Pira4	0.960863	0.207793	0.12185	0.373521	0.913785	0.110767	-0.16873	0.10647
UniRef100_O55026	Entpd2	0.598494	0.887402	0.281192	0.716497	0.339992	0.00557501	0.169006	0.106642
UniRef100_P26618	Pdgfra	0.0587822	0.441866	0.457418	0.641318	0.336564	0.255371	0.21902	0.106788
UniRef100_Q3SXF0	Ifitm6	0.422734	0.671268	0.0266471	0.623279	0.31863	0.0926415	0.271428	0.106885
UniRef100_P51675	Ccr1	0.572801	0.311902	0.804411	0.711847	0.0114741	0.936844	0.180739	0.107129
UniRef100_P10810	Cd14	0.48852	0.264376	0.0425006	0.735803	0.172307	0.126993	-0.300255	0.107132
UniRef100_P37040	Por	0.0278089	0.327337	0.260656	0.385518	0.0633407	0.257821	-0.363386	0.107201
UniRef100_P07759	Serpina3k	0.245357	0.427124	0.188916	0.539797	0.313431	0.559969	0.0922499	0.107279
UniRef100_Q9CR16	Ppid	0.900413	0.458351	0.66092	0.653874	0.929746	0.0234459	-0.214716	0.107641
UniRef100_P18111	Cdx1	0.368197	0.597336	0.894895	0.915415	0.431296	0.339817	0.0697885	0.108312
UniRef100_Q60809	Cnot7	0.551796	0.713774	0.385914	0.255021	0.213959	0.489521	0.0611922	0.108322
UniRef100_Q9DCD0	Pgd	0.267331	0.983106	0.743121	0.8923	0.340208	0.693744	-0.0673289	0.10853
UniRef100_Q9D646	Krt34	0.129585	0.515087	0.787025	0.167056	0.938969	0.785596	0.294273	0.10874
UniRef100_P12658	Calb1	0.0310606	0.257766	0.642994	0.040782	0.791955	0.551926	0.409702	0.109022
UniRef100_E9PVD9	Slco5a1	0.342239	0.262237	0.268478	0.705403	0.191137	0.425408	-0.0479508	0.109035
UniRef100_A2A9R6	Elavl4	0.0398748	0.0417079	0.0706618	0.634943	0.934389	0.662984	0.513917	0.109617
UniRef100_Q9D0K1	Pex13	0.317333	0.916939	0.390628	0.869361	0.167697	0.906875	0.0704874	0.109793
UniRef100_B1AWS8	Tek	0.091217	0.831918	0.975585	0.216045	0.0387114	0.385863	-0.128484	0.109981
UniRef100_Q6ZQJ5	Dna2	0.577417	0.605581	0.0586134	0.532618	0.755579	0.459176	0.0560653	0.10999
UniRef100_Q9D844	Dnajc4	0.523081	0.79487	0.799802	0.527227	0.730697	0.0412554	0.111785	0.110094
UniRef100_O88665	Brd7	0.740222	0.553988	0.726125	0.28356	0.0794882	0.988101	0.0941163	0.1102
UniRef100_Q9CQF7	Pfdn1	0.762364	0.589143	0.0552447	0.418749	0.235377	0.807573	0.290333	0.110381
UniRef100_Q9Z2D8	Mbd3	0.34064	0.106695	0.389157	0.0168536	0.94221	0.107263	-0.568259	0.110726
UniRef100_P43252	Ptgir	0.199505	0.639387	0.999581	0.559169	0.35042	0.551659	0.0652629	0.111318
UniRef100_Q8CI96	Clip4	0.147748	0.635158	0.554998	0.329618	0.19609	0.469535	0.0727099	0.111466
UniRef100_P56387	Dynlt3	0.689009	0.214776	0.256684	0.854404	0.295268	0.386116	0.0961099	0.111848
UniRef100_P35639	Ddit3	0.231425	0.111062	0.677504	0.808333	0.874325	0.252978	0.180289	0.111901
UniRef100_P97391	Pla2g5	0.100345	0.00357212	0.0624672	0.766136	0.091063	0.469937	-1.06825	0.112175
UniRef100_P08607	C4bp	0.513945	0.949637	0.598523	0.665421	0.0114378	0.394682	0.159549	0.112293
UniRef100_P63011	Rab3a	0.410161	0.416454	0.238133	0.650837	0.619091	0.0641861	0.110575	0.112337
UniRef100_Q8CGY8	Ogt	0.311611	0.7103	0.455168	0.508302	0.411947	0.150657	0.186354	0.112582
UniRef100_Q8BP48	Metap1	0.59701	0.0865992	0.315953	0.972515	0.282528	0.60919	0.0622783	0.112764
UniRef100_Q3TD49	3110056O03Rik	0.781711	0.0752024	0.774701	0.410993	0.994962	0.172731	0.119572	0.113269
UniRef100_Q8C5B3	Lamb3	0.983245	0.448465	0.681791	0.100362	0.0568697	0.720106	-0.192409	0.113309
UniRef100_Q91Z53	Grhpr	0.748905	0.999507	0.0511306	0.915497	0.216738	0.283683	0.149068	0.11341
UniRef100_P16254	Srp14	0.72369	0.903646	0.464676	0.977953	0.255989	0.198529	0.0983786	0.113498
UniRef100_P70207	Plxna2	0.931312	0.124396	0.814164	0.695148	0.0446455	0.665516	0.10027	0.113672
UniRef100_Q3TQ02	Alpl	0.313432	0.742085	0.21368	0.736666	0.916152	0.229951	-0.0685695	0.114423
UniRef100_Q9WUB0	Rbck1	0.123762	0.989572	0.375025	0.915228	0.87909	0.00680528	0.194186	0.114685
UniRef100_Q91VM9	Ppa2	0.71157	0.862901	0.720339	0.81698	0.214148	0.820365	0.0796499	0.114781
UniRef100_Q3TCZ2	Slc29a1	0.620647	0.88478	0.411855	0.771079	0.807366	0.239666	-0.0462985	0.114829
UniRef100_Q60846	Tnfrsf8	0.984168	0.873268	0.160122	0.587853	0.255158	0.692643	-0.123353	0.115073
UniRef100_P22646	Cd3e	0.286589	0.643803	0.21102	0.782683	0.0513685	0.046805	-0.258386	0.115189
UniRef100_O08532	Cacna2d1	0.571233	0.0353208	0.247863	0.591967	0.373014	0.64341	-0.44787	0.115342
UniRef100_Q80Y81	Elac2	0.774035	0.996582	0.704055	0.606224	0.103114	0.813803	-0.0702906	0.115532
UniRef100_Q9DBF1	Aldh7a1	0.306645	0.820152	0.673104	0.273306	0.00246504	0.940242	-0.179289	0.115808
UniRef100_O70591	Pfdn2	0.655094	0.247974	0.41309	0.781036	0.92994	0.277766	0.0570659	0.115934
UniRef100_Q9QXF8	Gnmt	0.167066	0.645557	0.13836	1	0.0747239	0.935542	-0.129688	0.115968
UniRef100_Q3UHF7	Hivep2	0.189272	0.00762961	0.513112	0.606969	0.0393453	0.42297	0.602741	0.116111
UniRef100_O54967	Tnk2	0.176891	0.833778	0.130606	0.867633	0.522305	0.553189	-0.144979	0.116148
UniRef100_P70665	Siae	0.471616	0.750793	0.007929	0.626529	0.0535583	0.377206	0.30016	0.116169
UniRef100_Q61362	Chi3l1	0.191507	0.391557	0.574653	0.166406	0.0898706	0.751918	-0.299421	0.116414
UniRef100_O35185	Bhlhe40	0.255618	0.880206	0.988863	0.947481	0.000329961	0.908011	0.230943	0.116537
UniRef100_Q91XG2	Cyp2a4	0.693244	0.860228	0.336517	0.459624	0.346377	0.452666	-0.0450668	0.116683
UniRef100_O88983	Stx8	0.971942	0.964368	0.925415	0.26211	0.0193744	0.785201	0.14877	0.116935
UniRef100_Q3UQ81	P4ha2	0.171493	0.0960988	0.235283	0.877574	0.373465	0.0517336	-0.356225	0.118342
UniRef100_P09103	P4hb	0.754689	0.806262	0.380378	0.431908	0.161483	7.11e-05	-0.356225	0.118342
UniRef100_Q9D103	Ifitm1	0.90244	0.487103	0.983428	0.136296	0.621509	0.12256	-0.198196	0.118435
UniRef100_Q8CGZ0	Cherp	0.935429	0.38726	0.770387	0.708946	0.410487	0.482013	0.0614224	0.118508
UniRef100_Q05117	Acp5	0.468552	0.313902	0.440483	0.653334	0.631464	0.00568447	0.190602	0.118652
UniRef100_Q6GTZ3	Id1	0.219404	0.733951	0.293517	0.410253	0.978077	0.847562	-0.112987	0.118863
UniRef100_Q9CQZ5	Ndufa6	0.868787	0.80921	0.469969	0.863259	0.0124745	0.17287	0.136463	0.119211
UniRef100_Q60722	Tcf4	0.252563	0.692551	0.106657	0.73051	0.601018	0.338524	0.0699604	0.119452
UniRef100_A2AR02	Ppig	0.274605	0.162242	0.472429	0.710695	0.00770847	0.968649	0.169963	0.11997
UniRef100_Q8VC56	Rnf8	0.656676	0.939469	0.5338	0.573909	0.773621	0.0161619	0.122966	0.12029
UniRef100_P13597	Icam1	0.453055	0.390486	0.418599	0.88968	0.468123	0.478678	-0.0790824	0.120333
UniRef100_Q8K3B1	Fbxo45	0.345355	0.50108	0.203393	0.580263	0.525355	0.378863	-0.0845313	0.120662
UniRef100_P97363	Sptlc2	0.932947	0.904548	0.131416	0.651413	0.141582	0.914253	-0.111041	0.120885
UniRef100_Q3UL36	Arglu1	0.285473	0.952271	0.830718	0.930021	0.339424	0.961289	-0.0725777	0.120911
UniRef100_Q99LC5	Etfa	0.710101	0.674941	0.946425	0.300225	0.805616	0.0921576	-0.110082	0.120918
UniRef100_Q9UH73	Ebf1	0.0837196	0.924535	0.454282	0.117735	0.0814541	0.595126	0.274967	0.120969
UniRef100_Q9R0M6	Rab9	0.542604	0.912315	0.442248	0.862134	0.348624	0.0140622	0.117887	0.120997
UniRef100_A2AI62	Heph	0.290463	0.361383	0.426533	0.849434	0.00195062	0.306752	0.206748	0.121019
UniRef100_P04441	Cd74	0.0869332	0.281408	0.0172313	0.273224	0.84807	0.0099274	-0.554703	0.121278
UniRef100_Q8R104	Sirt3	0.66466	0.936989	0.609984	0.990993	0.865296	0.0183341	0.135009	0.121305
UniRef100_E9QNY3	Myl10	0.116215	0.221568	0.409769	0.506748	0.0181974	0.873317	-0.184804	0.121473
UniRef100_O55233	Cer1	0.319559	0.0491414	0.0558573	0.823529	0.107376	0.766949	0.433284	0.121893
UniRef100_P56479	Galr1	0.832864	0.694086	0.572019	0.447076	0.0269155	0.804796	-0.110056	0.122405
UniRef100_P29974	Cnga1	0.312337	0.828222	0.0527062	0.304355	0.980093	0.499852	0.279805	0.122812
UniRef100_P56481	Cckbr	0.993427	0.338077	0.806337	0.467412	0.434821	0.540315	-0.0426552	0.123119
UniRef100_O35544	Slc1a6	0.29299	0.0504284	0.657993	0.203896	0.359897	0.823818	-0.477827	0.123808
UniRef100_P62304	Snrpe	0.920798	0.766255	0.663188	0.77974	0.701591	0.357454	-0.0452663	0.124095
UniRef100_P49290	Epx	0.161673	0.388489	0.612312	0.4097	0.198418	0.546174	-0.104142	0.124302
UniRef100_Q3UEW9	Adam17	0.127251	0.310093	0.84308	0.504726	0.233567	0.000590792	-0.249677	0.124481
UniRef100_Q9CQJ8	Ndufb9	0.791366	0.464342	0.31069	0.623609	0.501576	0.0595925	0.109271	0.124541
UniRef100_E9QK82	Mpz	0.627414	0.967845	0.119829	0.0220389	0.235974	0.9497	-0.63022	0.124754
UniRef100_P21836	Ache	0.957922	0.696062	0.112205	0.0667371	0.0017574	0.686158	-0.315422	0.125066
UniRef100_P09025	Hoxc8	0.715473	0.534966	0.724815	0.859071	0.495636	0.415518	0.0521184	0.125372
UniRef100_P10126	Eef1a1	0.754878	0.405778	0.608007	0.562466	0.832643	0.242465	0.0435178	0.125619
UniRef100_P28862	Mmp3	0.238623	0.314247	0.461355	0.60702	0.976453	0.255579	-0.0718742	0.125627
UniRef100_Q8VDW4	Ube2w	0.224601	0.00940945	0.137074	0.951617	0.457317	0.500832	0.616649	0.125714
UniRef100_Q3UVZ1	Il1rap	0.735247	0.150196	0.651644	0.572895	0.066308	0.199582	0.097141	0.125723
UniRef100_P97801	Smn1	0.669138	0.780869	0.478976	0.359085	0.144373	0.966496	0.0813344	0.125754
UniRef100_O08738	Casp6	0.520274	0.95562	0.0150505	0.894719	0.47028	0.00299276	0.349964	0.125885
UniRef100_Q8R429	Atp2a1	0.968715	0.42477	0.750513	0.950116	0.185423	0.554001	-0.0590191	0.125963
UniRef100_Q9JHL1	Slc9a3r2	0.88245	0.121935	0.833091	0.506621	0.434097	0.0111547	-0.105412	0.126807
UniRef100_P98064	Masp1	0.70776	0.53535	0.918915	0.347493	0.169261	0.492799	0.0607188	0.127053
UniRef100_Q9R216	Fzd9	0.881186	0.629153	0.509678	0.358246	0.39182	0.474567	-0.0479148	0.127206
UniRef100_Q61602	Gli3	0.269087	0.485524	0.705127	0.430389	0.380272	0.761988	0.0955359	0.127669
UniRef100_Q9JJ72	Rprm	0.956865	0.256603	0.441766	0.221423	0.585893	0.484867	-0.0902683	0.128273
UniRef100_A2CG49	Kalrn	0.991421	0.613853	0.0254212	0.464907	0.115547	0.952514	0.28915	0.128302
UniRef100_P63215	Gng3	0.792944	0.304668	0.99226	0.401057	0.485437	0.425766	-0.0498764	0.128583
UniRef100_P70269	Ctse	0.298112	0.291305	0.583864	0.878389	0.286436	0.943173	0.161272	0.128625
UniRef100_P08003	Pdia4	0.454881	0.672449	0.927305	0.590972	0.0755923	0.00109775	-0.214802	0.128812
UniRef100_Q8BVE3	Atp6v1h	0.891242	0.645053	0.621622	0.367892	0.0926445	0.879078	0.0903713	0.128864
UniRef100_Q64702	Plk4	0.431015	0.75032	0.707475	0.644504	0.029828	0.0174755	-0.172533	0.128969
UniRef100_P27889	Hnf1b	0.570028	0.625697	0.409501	0.473732	0.0517024	0.867736	0.152193	0.129023
UniRef100_Q9Z2W0	Dnpep	0.675399	0.0808175	0.244398	0.998124	0.371387	0.890452	0.155931	0.129173
UniRef100_Q60739	Bag1	0.657316	0.499945	0.601095	0.796072	0.215561	0.731352	0.0632512	0.12938
UniRef100_Q9D198	Syf2	0.338124	0.646579	0.647096	0.965938	0.401842	1.45e-05	0.172678	0.129801
UniRef100_Q61382	Traf4	0.921875	0.041209	0.429137	0.319301	0.524602	0.958994	0.0820844	0.130583
UniRef100_P97861	Krt86	0.869426	0.814749	0.495771	0.753685	0.657527	0.441512	-0.0642779	0.130958
UniRef100_O88425	Nme6	0.482846	0.155731	0.437479	0.906949	0.0671852	0.226239	-0.117265	0.130959
UniRef100_O35160	Pitx3	0.279378	0.779852	0.718522	0.89336	0.163555	0.368557	-0.0881641	0.131326
UniRef100_Q8VIG6	Traip	0.77473	0.374253	0.0568133	0.153921	0.0141186	0.0951994	-0.320528	0.131384
UniRef100_Q9WTJ8	Fam50b	0.671236	0.20573	0.943407	0.0745339	0.218474	0.397186	-0.223216	0.131683
UniRef100_P61956	Sumo2	0.406237	0.323571	0.0455562	0.969665	0.142616	0.419295	0.191142	0.131829
UniRef100_Q9QY42	Gpr37	0.290432	0.882025	0.733357	0.504953	0.646712	0.299772	-0.0403308	0.132133
UniRef100_Q9WTN3	Srebf1	0.645729	0.890389	0.933654	0.904013	0.0116289	0.90953	0.117678	0.132199
UniRef100_P00687	Amy1	0.0120403	0.652462	0.909583	0.218373	0.060126	0.959363	0.459538	0.132314
UniRef100_Q3TJW2	Fbxo15	0.955563	0.789892	0.00330974	0.169393	0.378125	0.921543	0.696531	0.132328
UniRef100_P07437	Tubb5	0.807369	0.285942	0.752538	0.642918	0.252183	0.547932	0.0633789	0.132404
UniRef100_Q91V36	Nrbp2	0.451343	0.142549	0.209632	0.760776	0.0203565	0.0170553	0.298864	0.132757
UniRef100_D3YTT5	Efna1	0.638428	0.046015	0.138709	0.606725	0.104043	0.00536991	0.390428	0.132758
UniRef100_Q3ULA2	Btrc	0.729739	0.808389	0.372507	0.46461	0.281261	0.584106	0.0426249	0.132789
UniRef100_A2AH85	Eftud2	0.492684	0.737425	0.357227	0.496351	0.411106	0.50565	-0.0753529	0.132983
UniRef100_P70210	Tead3	0.0436033	0.497106	0.0962591	0.58732	0.423744	0.812138	0.218799	0.133143
UniRef100_Q501M1	Il15ra	0.450224	0.81452	0.550576	0.489386	0.174994	0.874653	-0.0614604	0.134976
UniRef100_Q05922	Dusp2	0.968883	0.639729	0.0205509	0.855304	0.214313	0.401025	-0.192872	0.135038
UniRef100_P14753	Epor	0.448048	0.0420467	0.785871	0.0608694	0.250363	0.974958	0.484807	0.135246
UniRef100_Q9Y4Y9	Lsm5	0.351804	0.959232	0.634614	0.173711	0.349963	0.686803	0.0698576	0.135344
UniRef100_B2RQ20	Txk	0.907424	0.0205403	0.360306	0.449061	0.111956	0.725369	-0.510119	0.135552
UniRef100_Q9WTL2	Rab25	0.540848	0.558252	0.846895	0.102519	0.446886	0.793527	-0.120799	0.135779
UniRef100_Q3UTR7	Agt	0.283165	0.653131	0.869026	0.453514	0.0865268	0.798575	-0.118962	0.135818
UniRef100_Q61657	Hes3	0.281386	0.015663	0.662805	0.196345	0.777604	0.539503	0.592221	0.135955
UniRef100_Q9D2L5	Cpxm2	0.831126	0.952218	0.00118647	0.166733	0.790787	0.240025	-0.418662	0.136677
UniRef100_Q9Z0V2	Kcnd2	0.790154	0.281568	0.443352	0.125631	0.139528	0.809472	-0.30322	0.13673
UniRef100_P82349	Sgcb	0.812081	0.683206	0.898207	0.379627	0.306858	0.000906858	-0.0987667	0.137344
UniRef100_P51885	Lum	0.721531	0.958781	0.0280726	0.00606294	0.511589	0.757921	-0.405907	0.137516
UniRef100_P26883	Fkbp1a	0.715043	0.917094	0.665486	0.869676	0.737573	0.0250487	0.122437	0.138066
UniRef100_Q9JI13	Utp3	0.715594	0.822246	0.195229	0.337099	0.812322	0.0671134	-0.112178	0.138125
UniRef100_P86792	Ccl21c	0.51008	0.10873	0.0521128	0.0923015	0.481164	0.706929	-0.396888	0.139045
UniRef100_P17426	Ap2a1	0.820785	0.579401	0.368461	0.436679	0.135761	0.71738	0.0850585	0.140121
UniRef100_E9QM31	Mrvi1	0.13012	0.307157	0.35065	0.874995	0.0222192	0.753924	0.163338	0.140312
UniRef100_Q99PU8	Dhx30	0.524006	0.380776	0.0342926	0.952551	0.526153	0.522116	0.217975	0.140605
UniRef100_B1ASZ0	Gyk	0.936727	0.43771	0.190085	0.813242	0.00215372	0.045004	0.259227	0.140717
UniRef100_Q8K1K3	Tinf2	0.00922	0.276418	0.50239	0.653567	0.354601	0.511352	0.334122	0.14094
UniRef100_Q8C7Q4	Rbm4	0.966915	0.595299	0.019846	0.456505	0.949505	0.980614	0.238913	0.141154
UniRef100_Q64326	Mc2r	0.416213	0.901374	0.340536	0.461965	0.403893	0.814034	-0.0657729	0.141837
UniRef100_Q52KC3	Mcm5	0.176986	0.239616	0.922576	0.409668	0.201229	0.00412846	-0.317157	0.141909
UniRef100_P49443	Ppm1a	0.583881	0.685094	0.369609	0.777622	0.875672	0.0248181	0.153159	0.142066
UniRef100_Q64343	Abcg1	0.569689	0.617614	0.56835	0.712258	0.285369	0.769766	-0.056018	0.142252
UniRef100_Q9ESK3	Capn10	0.569756	0.493077	0.111039	0.488687	0.963177	0.168206	0.138468	0.142292
UniRef100_O35426	Xbp1	0.869132	0.650051	0.616912	0.579904	0.50807	0.00924852	-0.126744	0.142333
UniRef100_B2RQC6	Cad	0.0568795	0.563276	0.69013	0.447626	0.69862	0.093959	-0.207061	0.142383
UniRef100_P70343	Casp4	0.755922	0.28317	0.0410806	0.57798	0.971713	0.0627342	-0.302166	0.142563
UniRef100_Q9WTU6	Mapk9	0.650047	0.124689	0.258551	0.0521005	0.759355	0.985946	-0.273134	0.142751
UniRef100_Q05685	Folr2	0.882255	0.29006	0.0168812	0.48807	0.621716	0.980699	-0.429927	0.143391
UniRef100_Q9D6R2	Idh3a	0.932937	0.0604389	0.00608793	0.956511	0.379374	0.960061	0.881613	0.143474
UniRef100_E9QK83	Utp20	0.261033	0.422861	0.398737	0.631317	0.139348	0.277365	-0.163872	0.143587
UniRef100_Q6NXW6	Rad17	0.491904	0.406462	0.158938	0.566031	0.74212	0.341909	-0.0609679	0.143668
UniRef100_Q15365	Pcbp1	0.794165	0.756523	0.841956	0.678085	0.527206	0.0611827	0.0809955	0.143761
UniRef100_Q8R128	Agxt	0.376465	0.310486	0.504482	0.466653	0.364181	0.407774	-0.0715414	0.143948
UniRef100_Q61166	Mapre1	0.695927	0.62341	0.39984	0.87977	0.0174079	0.645862	0.102841	0.14408
UniRef100_P61458	Pcbd1	0.789475	0.977662	0.0173228	0.987285	0.491013	0.0895562	0.225156	0.144516
UniRef100_Q9DAP7	Asf1b	0.118256	0.235058	0.561702	0.694813	0.645422	0.0724155	-0.164703	0.144593
UniRef100_Q9WUD0	Cyp2b10	0.734727	0.30397	0.0356879	0.890087	0.653982	0.18235	0.388661	0.144818
UniRef100_O54799	Nmbr	0.152311	0.0575936	0.468264	0.950614	0.615363	0.678662	-0.391163	0.145294
UniRef100_Q3V3X2	Icos	0.473669	0.704425	0.180411	0.265083	0.303258	0.183874	0.204854	0.14531
UniRef100_Q8BTZ4-2	Anapc5	0.5759	0.62723	0.572869	0.680361	0.516306	0.0030433	0.13072	0.145366
UniRef100_Q9WUZ5	Tnni1	0.941832	0.156092	0.248803	0.283911	0.0830735	0.212795	-0.379818	0.145523
UniRef100_P35276	Rab3d	0.857457	0.436516	0.456624	0.729671	0.112545	0.000506215	-0.184834	0.146179
UniRef100_Q8VCZ9	Prodh2	0.972227	0.980917	0.195042	0.821619	0.209718	0.326005	-0.056588	0.147023
UniRef100_P00186	Cyp1a2	0.743507	0.0111655	0.775946	0.00935103	0.595944	0.739362	-0.608937	0.147145
UniRef100_O55241	Hcrt	0.0457163	0.382392	0.532281	0.350757	0.0463735	0.515626	0.348072	0.147146
UniRef100_Q8K3I3	Cxcl5	0.721429	0.0976399	0.0129068	0.836689	0.015327	0.95759	-0.540886	0.147179
UniRef100_Q02650	Pax5	0.837354	0.0230236	0.796886	0.195149	0.0834932	0.54957	0.384119	0.147267
UniRef100_Q8C2S5	Fbxl5	0.298535	0.514372	0.0795291	0.649933	0.95212	0.265329	0.182418	0.147422
UniRef100_P70697	Urod	0.906371	0.411096	0.00112053	0.56514	0.447111	0.417593	-0.543413	0.148133
UniRef100_P45591	Cfl2	0.773857	0.22685	0.840785	0.397597	0.0200121	0.971036	0.1121	0.148367
UniRef100_Q9Z0J4	Nos1	0.280807	0.299232	0.11994	0.714371	0.811871	0.300657	-0.231384	0.148459
UniRef100_P63239	Pcsk1	0.692801	0.599172	0.875373	0.798983	0.00066984	0.591114	-0.150528	0.148659
UniRef100_Q4VBF6	Bcl2	0.288659	0.535818	0.160938	0.340069	0.513743	0.874035	0.18744	0.14889
UniRef100_O08762	Prss12	0.86959	0.597627	0.529232	0.931645	0.792626	0.338874	-0.0516707	0.148943
UniRef100_P15948	Klk1b22	0.456253	0.585019	0.204997	0.727809	0.004277	0.0150107	-0.220708	0.149147
UniRef100_Q6PGJ3	L1cam	0.808393	0.00983642	0.0269805	0.0482186	0.189071	0.74166	-0.630087	0.149387
UniRef100_P01831	Thy1	0.737736	0.633222	0.286892	0.0115774	0.695488	0.830823	-0.336086	0.149471
UniRef100_Q4U260	Ank3	0.472133	0.743285	0.517307	0.219863	0.89645	0.323041	0.0391436	0.149688
UniRef100_O35182	Smad6	0.592026	0.986576	0.455794	0.0280089	0.0165889	0.444013	-0.228871	0.150424
UniRef100_Q63844	Mapk3	0.561064	0.793737	0.144647	0.586895	0.0365291	0.00774799	0.172148	0.150611
UniRef100_P15530	Cd79b	0.0135426	0.0710032	0.0225949	0.201746	0.976479	0.00289941	-0.700342	0.150706
UniRef100_Q80Y75	Dnajb13	0.301264	0.179647	0.343855	0.707049	0.710979	0.496857	0.0436046	0.150938
UniRef100_P34960	Mmp12	0.1967	0.18742	0.675901	0.404764	0.651846	0.417541	0.0501259	0.151366
UniRef100_P51830	Adcy9	0.239486	0.773985	0.0734234	0.887287	0.746512	0.97286	0.175619	0.151493
UniRef100_Q8R5A0	Smyd2	0.982552	0.986754	0.0338771	0.852048	0.122609	0.325718	0.187386	0.151685
UniRef100_Q4KML9	Ptpn21	0.730538	0.0309098	0.924849	0.119313	0.142067	0.702391	0.40735	0.152174
UniRef100_O35465	Fkbp8	0.726013	0.620199	0.765142	0.853772	0.441491	0.00663845	0.158211	0.152329
UniRef100_P32300	Oprd1	0.207647	0.138901	0.432178	0.487589	0.0751013	0.748347	0.381711	0.152343
UniRef100_A2AG68	Atp7a	0.839816	0.102747	0.0175323	0.660571	0.0309455	0.091092	0.35183	0.152683
UniRef100_P14901	Hmox1	0.735767	0.243274	0.396764	0.0110303	0.738005	0.437766	-0.425766	0.152811
UniRef100_O35382	Exoc4	0.393729	0.511794	0.156669	0.817293	0.988871	0.378357	-0.0399473	0.153127
UniRef100_Q9DBL0	Adra1b	0.357394	0.137939	0.483108	0.957129	0.634303	0.390746	0.0347046	0.153796
UniRef100_Q8BMZ5	Tsen34	0.62232	0.604117	0.843871	0.739578	0.257232	0.848324	0.0695622	0.154081
UniRef100_O15514	Polr2d	0.375414	0.230843	0.716412	0.178447	0.83757	0.993181	0.151144	0.154336
UniRef100_P08074	Cbr2	0.321688	0.783862	0.957245	0.49804	0.015495	0.0586691	-0.175027	0.154352
UniRef100_P47941	Crkl	0.364167	0.266173	0.304335	0.788338	0.66076	0.435418	0.0614942	0.154358
UniRef100_Q80YC5	F12	0.354201	0.271653	0.444513	0.0026083	0.472572	0.347854	0.550139	0.154627
UniRef100_Q8K354	Cbr3	0.176255	0.486676	0.745091	0.996231	4.14e-06	0.860811	-0.370869	0.154933
UniRef100_Q9Z120	Mettl1	0.997921	0.178107	0.722899	0.952078	0.914676	0.019079	-0.104864	0.155042
UniRef100_P70378	Fgf11	0.446528	0.43731	0.922983	0.320363	0.0146571	0.346793	-0.109319	0.155302
UniRef100_P09631	Hoxa9	0.926146	0.37261	0.688236	0.0959292	0.899865	0.882674	-0.161475	0.156065
UniRef100_O89090	Sp1	0.899803	0.853028	0.00501282	0.651227	0.30635	0.942945	0.230708	0.156558
UniRef100_B1B1D3	Zfp40	0.944555	0.810538	0.372218	0.446395	0.50803	0.329342	-0.0506958	0.156621
UniRef100_Q8BUU7	Galk2	0.616259	0.0424115	0.719677	0.605108	0.219363	0.560247	-0.12307	0.15677
UniRef100_Q9D104	Srp19	0.655746	0.289445	0.251508	0.827638	0.105588	0.893209	-0.086095	0.156771
UniRef100_P51637	Cav3	0.255248	0.239126	0.515089	0.334328	0.0872757	0.639866	-0.0961703	0.156801
UniRef100_P21761	Trhr	0.933209	0.113649	0.667836	0.234419	0.449125	0.637234	-0.78439	0.15693
UniRef100_P22272	Il6ra	0.304173	0.989767	0.0654826	0.586019	0.567285	0.463649	0.183154	0.157305
UniRef100_P61022	1500003O03Rik	0.528737	0.152199	0.435261	0.950352	0.694203	0.00735791	0.257404	0.157736
UniRef100_Q3U3J1	Bckdha	0.43333	0.589196	0.358604	0.617368	0.833163	0.0356831	0.147772	0.157762
UniRef100_Q8K0L3	Acsm2	0.631638	0.753723	0.678745	0.382349	0.0854829	0.937343	-0.0849537	0.158182
UniRef100_Q9CY46	Lsm4	0.8062	0.493741	0.353765	0.611915	0.229219	0.0142206	-0.161094	0.159129
UniRef100_Q05144	Rac2	0.337258	0.750645	0.0919858	0.0489504	0.0431038	0.798108	-0.282076	0.159258
UniRef100_Q8VGA9	Olfr156	0.262186	0.434863	0.761963	0.302572	0.245142	0.872666	0.104634	0.159677
UniRef100_Q7TSV2	Slc9a1	0.470364	0.240002	0.364959	0.959111	0.560101	0.305248	-0.0893628	0.159933
UniRef100_Q8K4L0	Ddx54	0.905345	0.948378	0.272551	0.631329	0.496644	0.302808	0.0455404	0.160167
UniRef100_B2RX12	Abcc3	0.120238	0.888587	0.116506	0.782352	0.795894	0.663811	-0.195297	0.160459
UniRef100_Q03347	Runx1	0.612025	0.057211	0.00491656	0.476634	0.619769	0.901375	-0.521212	0.160607
UniRef100_Q8BQ46	Taf15	0.375185	0.426781	0.0319474	0.998277	0.836399	0.642717	0.281586	0.16063
UniRef100_P08103	Hck	0.397009	0.838105	0.0644746	0.0476337	0.008773	0.433144	-0.272936	0.160794
UniRef100_Q8R323	Rfc3	0.448623	0.663691	0.354629	0.190597	0.591166	0.731607	0.0661345	0.160842
UniRef100_Q99LB6	Mat2b	0.188982	0.973015	0.896366	0.780975	0.795416	0.000718606	0.198834	0.160853
UniRef100_Q05722	Col9a1	0.779601	0.370362	0.650461	0.424974	0.0244509	0.928297	-0.126551	0.160911
UniRef100_Q5DTM8	Rnf20	0.53644	0.946931	0.778865	0.556215	0.439603	0.435702	-0.0389539	0.161117
UniRef100_P05533	Ly6a	0.46685	0.940167	0.127415	0.702238	0.0225368	0.0101922	-0.518666	0.161118
UniRef100_Q922Q2	Riok1	0.709757	0.908574	0.72327	0.341501	0.119118	0.951524	0.0920918	0.161244
UniRef100_E9Q634	Myo1e	0.304588	0.243618	0.518094	0.550758	0.0477388	0.876039	0.123059	0.162023
UniRef100_Q8VE98	Cd276	0.43248	0.970903	0.0253214	0.97579	0.244776	0.000159127	-0.359567	0.162054
UniRef100_P18181	Cd48	0.0643516	0.403083	0.00106863	0.197803	0.0683259	0.628708	-0.660341	0.162187
UniRef100_Q8BP47	Nars	0.932671	0.562026	0.801561	0.925058	0.717424	0.013239	-0.137465	0.162371
UniRef100_A4QPD4	Lnx1	0.345149	0.969557	0.0622962	0.986878	0.1629	0.643962	0.146639	0.162489
UniRef100_E9Q109	Nip7	0.496881	0.472252	0.664214	0.964346	0.340547	0.519162	-0.0350046	0.162916
UniRef100_A2AFM9	Pfkfb1	0.359455	0.448445	0.0611739	0.955761	0.79951	0.666237	0.175987	0.163304
UniRef100_P16294	F9	0.388717	0.439314	0.56976	0.209431	0.59087	0.618953	-0.0493207	0.163642
UniRef100_Q9QZ11	Exo1	0.586276	0.382409	0.557438	0.498857	0.178519	0.762843	-0.0873392	0.163736
UniRef100_P21661	Pcsk2	0.145979	0.36274	0.00980796	0.625947	0.242351	0.546619	0.404211	0.163968
UniRef100_P08553	Nefm	0.305146	0.273166	0.890632	0.917086	0.0626589	0.80943	-0.125979	0.164389
UniRef100_O88338	Cdh16	0.44723	0.266232	0.859086	0.730428	0.101587	0.700338	-0.101259	0.16487
UniRef100_Q8BGF7	Pan2	0.161301	0.886446	0.970912	0.556024	0.420497	0.546433	-0.0705689	0.164955
UniRef100_P32043	Hoxc5	0.93734	0.782832	0.439219	0.894546	0.412552	0.53249	-0.0433237	0.165056
UniRef100_O00487	Psmd14	0.959545	0.775099	0.093539	0.904267	0.795953	0.199504	-0.138034	0.165412
UniRef100_P17534	Defa-rs2	0.00174819	0.058786	0.304905	0.278852	0.828014	0.543398	-0.749568	0.165541
UniRef100_P47212	Gal	0.262066	0.338061	0.421498	0.93636	0.000422706	0.788301	0.198128	0.165795
UniRef100_E9Q6P9	Cacna1h	0.705302	0.0200001	0.061547	0.722908	0.572239	0.100868	0.631303	0.166269
UniRef100_O54718	Irs3	0.332503	0.390425	0.399804	0.37637	0.087034	0.527616	-0.0956107	0.16635
UniRef100_Q8BH76	Pold3	0.91551	0.950185	0.556768	0.957822	0.899769	0.00187649	-0.128641	0.167378
UniRef100_P10148	Ccl2	0.657687	0.9115	0.227072	0.219779	0.737395	0.354885	-0.0494223	0.167882
UniRef100_G3X9S2	Enpp1	0.381138	0.443884	0.894506	0.751352	0.950507	0.000674996	-0.153332	0.16811
UniRef100_Q01341	Adcy6	0.485227	0.831085	0.987967	0.97603	0.868565	0.000726825	0.157843	0.168124
UniRef100_O89103	Cd93	0.613192	0.579231	0.333481	0.502798	0.825161	0.119051	-0.0711115	0.168186
UniRef100_P06683	C9	0.252631	0.0846523	0.944367	0.617196	0.3659	0.0990061	-0.181506	0.16841
UniRef100_P27038	Acvr2a	0.545012	0.554296	0.579912	0.393066	0.0434966	0.398192	0.114773	0.168527
UniRef100_O70325	Gpx4	0.953156	0.737201	0.0276395	0.683565	0.442005	0.02834	0.211703	0.168684
UniRef100_Q9WV55	Vapa	0.0271349	0.51169	0.984981	0.600839	0.501176	0.996834	0.297129	0.169007
UniRef100_Q8R480	Nup85	0.19913	0.760781	0.934183	0.501346	0.506545	0.00606765	-0.120545	0.169008
UniRef100_Q91YI0	Asl	0.630393	0.486355	0.714184	0.417214	0.0494577	0.0473982	0.131989	0.169401
UniRef100_Q91ZJ5	Ugp2	0.465452	0.153721	0.135511	0.68034	0.825076	0.442209	-0.147226	0.169712
UniRef100_P48962	Slc25a4	0.234483	0.607813	0.520346	0.915739	0.434923	0.94234	0.0620712	0.169999
UniRef100_Q9WTM3	Sema6c	0.469576	0.815715	0.186578	0.315449	0.180262	0.526351	-0.0618332	0.170339
UniRef100_O70445	Bard1	0.470398	0.594461	0.0725779	0.0546189	0.4119	0.914315	0.527377	0.170369
UniRef100_O54794	Aqp7	0.861071	0.193265	0.0543969	0.835077	0.808086	0.538079	0.332921	0.17086
UniRef100_Q9ER71	Rhoj	0.397318	0.930911	0.943538	0.809158	0.852176	0.264082	-0.0388039	0.170893
UniRef100_P97314	Csrp2	0.766677	0.494931	0.955606	0.634502	0.0340461	0.858989	0.0941922	0.170989
UniRef100_E9Q1B0	Sgk1	0.65334	0.653733	0.0675379	0.342939	0.00896585	0.0119221	0.280872	0.171023
UniRef100_Q64434	Ptk6	0.631639	0.12291	0.127712	0.547581	0.330954	0.0546612	-0.381467	0.1711
UniRef100_P34821	Bmp8a	0.803804	0.0915486	0.969337	0.513608	0.498755	0.120327	0.0808522	0.171337
UniRef100_Q9Z0H8	Clip2	0.759744	0.963499	0.33962	0.792581	0.310285	0.670354	-0.0394047	0.171378
UniRef100_Q5SX40	Myh1	0.259403	0.402693	0.0060984	0.0959776	0.306087	0.633069	0.612995	0.171907
UniRef100_P84444	Ccl21a	0.51008	0.10873	0.0521128	0.0923015	0.481164	0.0612749	-0.380071	0.172126
UniRef100_Q9WTM5	Ruvbl2	0.374524	0.358195	0.823214	0.819936	0.0862616	0.696804	-0.0861787	0.172315
UniRef100_Q9CZN7	Shmt2	0.332832	0.0561445	0.128809	0.618994	0.943293	0.0090268	-0.324795	0.172637
UniRef100_P70396	Dlx5	0.225893	0.822649	0.104067	0.303581	0.873125	0.846982	0.228241	0.172845
UniRef100_Q80TR1	Lphn1	0.672917	0.075051	0.697743	0.477818	0.858198	0.34332	0.0483089	0.172885
UniRef100_P97302	Bach1	0.818642	0.229252	0.000166582	0.737876	0.0550202	0.612475	0.79258	0.173311
UniRef100_P70315	Was	0.167209	0.24678	0.0469378	0.147831	0.147673	0.0363051	-0.327058	0.173518
UniRef100_P26187	Mgmt	0.945509	0.214403	0.529878	0.710235	0.0976431	0.497601	-0.0930816	0.173871
UniRef100_Q31094	H2-DMb1	0.386246	0.879648	0.0107349	0.147317	0.0846381	0.0149136	-0.709593	0.174112
UniRef100_P61266	Stx1b	0.0348782	0.25283	0.227192	0.00765234	0.0759344	0.943306	-0.670217	0.175526
UniRef100_O08586	Pten	0.443523	0.605539	0.0146605	0.689249	0.127604	0.428764	0.323018	0.175666
UniRef100_P42703	Lifr	0.477016	0.439871	0.564452	0.630701	0.679103	0.47446	0.0366209	0.175797
UniRef100_Q04519	Smpd1	0.374617	0.00850625	0.784663	0.869832	0.361055	0.132661	0.470666	0.17618
UniRef100_Q15287	Rnps1	0.989074	0.64969	0.798482	0.926831	0.836437	0.293112	0.0495323	0.176207
UniRef100_A2BDY3	Foxd3	0.00114693	0.496493	0.227167	0.165254	0.103171	0.0685155	-0.518698	0.176224
UniRef100_P49615	Cdk5	0.646435	0.06139	0.567479	0.681369	0.015253	0.0901525	0.176117	0.176469
UniRef100_O89116	Vti1a	0.547668	0.744928	0.0314578	0.713714	0.0752829	0.826211	0.27658	0.176499
UniRef100_O70250	Pgam2	0.58048	0.572063	0.044258	0.230421	0.12153	0.639841	-0.251984	0.176666
UniRef100_Q9D4I9	Rab23	0.362204	0.38206	0.235348	0.888065	0.469419	0.567738	-0.0353861	0.17667
UniRef100_P62158	Calm2	0.14932	0.137647	0.866357	0.969895	0.425	0.313572	-0.16276	0.176895
UniRef100_P41160	Lep	0.298062	0.604826	0.709267	0.242533	0.154937	0.32588	-0.0903739	0.177839
UniRef100_Q8C567	Ncr1	0.236389	0.309394	0.289638	0.504632	0.120348	0.969919	0.131618	0.178201
UniRef100_Q3UWH3	Vrk1	0.187187	0.00644727	0.844863	0.627107	0.613331	0.0468411	-0.619604	0.178294
UniRef100_Q3TQP6	Me1	0.850437	0.264837	0.81497	0.269194	0.0109688	0.000462416	-0.388816	0.178442
UniRef100_Q04211	Btg2	0.624022	0.941119	0.330812	0.52175	0.601911	0.0554332	-0.0817017	0.17864
UniRef100_Q9D1C9	Rrp7a	0.697123	0.669755	0.0899064	0.265558	0.31506	0.708342	0.155933	0.178804
UniRef100_P23506	Pcmt1	0.415162	0.497373	0.956762	0.354183	0.415316	0.809453	0.0605114	0.178897
UniRef100_P50992	Atp4b	0.257651	0.573637	0.196041	0.222846	0.0545746	0.346632	-0.110602	0.178929
UniRef100_P68366	Tuba4a	0.387472	0.544259	0.887629	0.865983	0.0955181	0.942934	0.0938965	0.179208
UniRef100_Q62381	Tll1	0.159498	0.443731	0.186381	0.473123	0.0505171	0.781463	0.264504	0.179346
UniRef100_E9QLI9	Ceacam2	0.258556	0.992606	0.302264	0.64683	0.569615	0.00459975	-0.184797	0.179447
UniRef100_P41274	Tnfsf9	0.226552	0.0771735	0.612981	0.855566	0.394132	0.446265	-0.0546415	0.179506
UniRef100_P34152	Ptk2	0.348016	0.85678	0.966069	0.249771	0.146458	0.645557	0.107835	0.179751
UniRef100_Q60878	Olfr140	0.613388	0.133735	0.360287	0.239647	0.587652	0.213341	-0.225538	0.179812
UniRef100_P42582	Nkx2-5	0.759166	0.0198765	0.956165	0.261776	0.0500091	0.579938	-0.483739	0.179848
UniRef100_P30882	Ccl5	0.0740569	0.654929	0.283628	0.138342	0.00173606	0.0250979	-0.379969	0.179946
UniRef100_E9QNP6	Klf1	0.612047	0.60486	0.280659	0.906547	0.5148	0.362409	-0.061018	0.180087
UniRef100_A2APR8	Bub1	0.123865	0.525843	0.0686584	0.487967	0.910203	0.766736	-0.250009	0.180096
UniRef100_P70318	Tial1	0.694406	0.455927	0.184015	0.856492	0.901344	0.29537	-0.0801871	0.180189
UniRef100_Q8BW00	Ptrh1	0.544591	0.471385	0.92739	0.394685	0.581386	0.038362	0.112013	0.180266
UniRef100_Q60753	Ctf1	0.985139	0.0350866	0.351072	0.877819	0.488828	0.292352	0.26526	0.180266
UniRef100_P63250	Kcnj3	0.12692	0.89497	0.0254638	0.976777	0.143715	0.60969	0.417215	0.1803
UniRef100_Q78ZA7	Nap1l4	0.390208	0.958534	0.798074	0.874167	0.952299	0.341466	-0.0464627	0.180354
UniRef100_Q9CXB2	Slc10a6	0.778959	0.24082	0.604082	0.839575	0.927256	0.357366	0.0415549	0.180926
UniRef100_Q8BHM6	Gabrg1	0.197371	0.200087	0.771101	0.604741	0.505163	0.684362	-0.0407028	0.181178
UniRef100_Q9Z0Y2	Pla2g1b	0.500164	0.895564	0.909818	0.757384	0.204893	0.97584	0.186716	0.181343
UniRef100_O35457	Ccrl2	0.953601	0.138114	0.896564	0.0755965	0.896651	0.46376	-0.251222	0.18158
UniRef100_P59328	Wdhd1	0.38514	0.565585	0.293301	0.265392	0.799374	0.360807	-0.0331718	0.181586
UniRef100_Q3UEH8	Pah	0.621961	0.248718	0.0858185	0.81368	0.430249	0.440104	-0.284267	0.181679
UniRef100_P15499	Prph2	0.384697	0.351995	0.904264	0.181986	0.118781	0.840029	-0.137274	0.18282
UniRef100_P70297	Stam	0.703129	0.273377	0.703755	0.703948	0.701435	0.0337587	-0.123008	0.183141
UniRef100_Q9D1Q4	Dpm3	0.0333437	0.97431	0.309253	0.786603	0.188971	0.0243947	-0.215542	0.183364
UniRef100_Q7TQD7	Myo1b	0.846177	0.623076	0.0430747	0.919013	0.983854	0.400671	-0.248595	0.183766
UniRef100_E9Q8I0	Cfh	0.942962	0.0438737	0.951332	0.201663	0.978824	0.853195	-0.589372	0.184118
UniRef100_Q4FCQ7	Ate1	0.543804	0.0867064	0.175002	0.0806492	0.383381	0.290808	-0.33783	0.184136
UniRef100_Q920L5	Elovl6	0.297274	0.590689	0.563171	0.823488	0.941365	0.0598154	-0.117168	0.184255
UniRef100_Q31092	H2-Ea-ps	0.187087	0.107412	0.188334	0.414199	0.33665	0.0476244	-0.485569	0.184387
UniRef100_Q6PCM2	Ints6	0.2387	0.906609	0.777223	0.806187	0.362367	0.454286	-0.0446162	0.185423
UniRef100_P09630	Hoxc6	0.753257	0.661491	0.369177	0.6629	0.5097	0.550617	0.0449441	0.185502
UniRef100_P97873	Loxl1	0.489531	0.566643	0.509582	0.0731676	0.222917	0.751309	-0.267974	0.185636
UniRef100_Q02496	Muc1	0.495593	0.0163139	0.841582	0.466235	0.774464	0.465357	0.626953	0.185685
UniRef100_P56404	Aqp8	0.5521	0.845465	0.367931	0.363648	0.107707	0.610323	-0.271198	0.185836
UniRef100_O70138	Mmp8	0.685596	0.129213	0.409957	0.963584	0.846151	0.526195	0.0445013	0.186057
UniRef100_Q9QZH3	Ppie	0.516729	0.298299	0.237898	0.494631	0.465632	0.414762	-0.0602452	0.186252
UniRef100_P09920	Csf3	0.641625	0.0275302	0.942858	0.64597	0.0444578	0.833177	-0.417212	0.186381
UniRef100_O54992	Mapkapk5	0.785333	0.610888	0.171915	0.943154	0.00721411	0.858059	0.108391	0.186513
UniRef100_P97402	Gcnt2	0.0838345	0.0579321	0.657966	0.239404	0.000221157	0.020756	0.442423	0.186592
UniRef100_P97952	Scn1b	0.637951	0.00584284	0.813248	0.22568	0.858893	0.466398	-0.690343	0.186676
UniRef100_O88487	Dync1i2	0.489953	0.995811	0.678438	0.481186	0.604451	0.495312	0.0592784	0.186806
UniRef100_Q91ZU1	Asb6	0.14381	0.459965	0.452665	0.499695	0.685498	0.0640142	0.100375	0.187686
UniRef100_A2AVV2	Capn3	0.730613	0.133771	0.965512	0.156617	0.31284	0.558594	0.14433	0.18791
UniRef100_P14097	Ccl4	0.873596	0.0115856	0.941462	0.956323	0.313997	0.00458383	0.465646	0.188045
UniRef100_P70691	Ugt1a2	0.914387	0.467855	0.214045	0.868581	0.602108	0.0690921	0.123806	0.188125
UniRef100_P25444	Rps2	0.769883	0.266517	0.581804	0.698542	0.442816	0.581162	-0.0460342	0.188157
UniRef100_P14148	Rpl7	0.669823	0.283785	0.745273	0.395593	0.449182	0.357566	0.0546115	0.188645
UniRef100_Q9QYP6	Azi2	0.75873	0.602176	0.155557	0.407317	0.604253	0.00620227	-0.113515	0.188824
UniRef100_Q61501	E2f1	0.116526	0.933401	0.586674	0.374264	0.216568	0.0526451	-0.150912	0.189507
UniRef100_P09838	Dntt	0.7398	0.522907	0.137859	0.901639	0.792212	0.318045	0.0444763	0.189867
UniRef100_Q9ES52-3	Inpp5d	0.622194	0.476794	0.267663	0.186899	0.958624	0.0630523	-0.12352	0.190044
UniRef100_Q91ZX7	Lrp1	0.963381	0.919204	0.212038	0.411138	0.898353	0.635	0.0879162	0.190098
UniRef100_Q921J4	Ube2s	0.38882	0.250841	0.85619	0.464592	0.290713	0.819176	-0.0447138	0.190147
UniRef100_O70578	Cacng1	0.102443	0.105305	0.632113	0.592164	0.508463	0.18594	0.340829	0.190362
UniRef100_P23683	Evx1	0.749693	0.896432	0.432817	0.29904	0.0541612	0.0150028	-0.184928	0.190805
UniRef100_Q9D0I9	Rars	0.946118	0.853232	0.0600557	0.685938	0.687341	0.277272	-0.159403	0.191047
UniRef100_D3YU39	Chpt1	0.444092	0.0322879	0.395315	0.952321	0.0410285	0.177509	0.390674	0.191507
UniRef100_O55226	Chad	0.907869	0.244027	0.407972	0.703035	0.512365	0.361704	0.0458103	0.192064
UniRef100_Q9D404	Oxsm	0.09463	0.646778	0.0458845	0.262066	0.13339	0.718319	0.385258	0.192133
UniRef100_G5E8P8	Esrrb	0.340712	0.0450056	0.461626	0.695794	0.0485767	0.815796	0.300157	0.192186
UniRef100_P51670	Ccl9	0.842654	0.388984	0.648744	0.666517	0.144619	0.000490508	-0.321349	0.192201
UniRef100_P48967	Cdc25c	0.958438	0.156276	0.756158	0.686112	0.994495	0.0659427	-0.102082	0.192659
UniRef100_Q80WD6	Olfr2	0.638504	0.834191	0.123759	0.786987	0.950421	0.428854	0.0427037	0.193192
UniRef100_O08785	Clock	0.583463	0.538283	0.898497	0.233541	0.0653543	0.357897	0.117206	0.193245
UniRef100_Q3ULZ4	Elf5	0.0597936	0.164761	0.185821	0.584846	0.322664	0.662962	0.320955	0.193838
UniRef100_Q1AJD0	Myst2	0.76922	0.76161	0.388627	0.943645	0.818719	0.230613	0.0452459	0.19411
UniRef100_Q05BD6	Grm8	0.895417	0.867302	0.160323	0.442677	0.220432	0.82823	-0.0688998	0.194241
UniRef100_Q91UZ5	Impa2	0.67482	0.140515	0.845761	0.958811	0.794935	0.335288	-0.0538694	0.194448
UniRef100_A2BEE9	Dlg3	0.720673	0.342571	0.792591	0.75157	0.165302	0.73016	0.0634896	0.194679
UniRef100_Q9JMJ2	Fbxw4	0.35288	0.69518	0.828105	0.932545	0.61035	0.0453815	0.115142	0.194854
UniRef100_Q8BTZ7	Gmppb	0.69696	0.921265	0.606459	0.799442	0.571774	0.388661	-0.0828991	0.195806
UniRef100_P28352	Apex1	0.643997	0.508111	0.651145	0.815605	0.681723	0.336782	0.0542719	0.196006
UniRef100_O35284	Batf	0.22923	0.466493	0.325939	0.788693	0.334561	0.0417904	0.164757	0.196089
UniRef100_Q8BKF1	Polrmt	0.845364	0.934804	0.897684	0.894238	0.791811	0.249946	-0.0595815	0.196418
UniRef100_O88932	Kcnj15	0.400546	0.842426	0.784108	0.431551	0.514859	0.454108	-0.0334669	0.196433
UniRef100_Q8C2P3	Dus1l	0.958583	0.719386	0.353655	0.526482	0.609547	0.741714	0.0670762	0.196607
UniRef100_P16882	Ghr	0.226804	0.080708	0.150311	0.635451	0.196094	0.041309	0.329526	0.197025
UniRef100_Q9DA08	Ccdc101	0.854274	0.785628	0.774401	0.812341	0.447957	0.667251	0.0750448	0.197051
UniRef100_Q8K4C4	Il17d	0.548104	0.73277	0.016064	0.734672	0.0929324	0.302714	0.189388	0.197157
UniRef100_P60896	Shfm1	0.71357	0.986417	0.214582	0.917111	0.599361	0.0493196	-0.0987309	0.197328
UniRef100_Q9WV03	Fam50a	0.765107	0.523867	0.788508	0.829985	0.00949818	0.0121397	0.116299	0.197532
UniRef100_Q6DI63	C1qc	0.365664	0.666185	0.0501629	0.0521485	0.133589	0.758174	-0.220913	0.197654
UniRef100_E9Q3U6	Klrb1c	0.180316	0.140248	0.00115089	0.110294	0.0527097	0.495342	-0.553355	0.198134
UniRef100_Q9DBY8	Nvl	0.714752	0.846613	0.852774	0.971461	0.453029	0.610503	0.0441383	0.198239
UniRef100_Q92572	Ap3s1	0.816311	0.958798	0.121888	0.978426	0.36443	0.000583591	-0.158098	0.198346
UniRef100_Q9QUR6	Prep	0.0612237	0.618317	0.903869	0.581974	0.787453	0.651261	-0.180808	0.198455
UniRef100_P26952	Il3ra	0.466105	0.0322794	0.158533	0.338339	0.32293	0.71838	-0.443131	0.198605
UniRef100_Q8VCH0	Acaa1b	0.351319	0.725024	0.0345831	0.769841	0.226542	0.871332	0.26151	0.198739
UniRef100_Q9WTR1	Trpv2	0.826147	0.780284	0.902811	0.952741	0.0312122	0.930828	0.0880779	0.198881
UniRef100_E9PW34	Ryr3	0.524087	0.368133	0.755609	0.0524885	0.825588	0.845914	0.275039	0.199359
UniRef100_O88454	Kcnk4	0.265552	0.238572	0.0766712	0.27834	0.0875468	0.846494	-0.23627	0.199733
UniRef100_Q3UN16	Gpr162	0.248186	0.344001	0.336526	0.227742	0.187839	0.831632	-0.119605	0.199935
UniRef100_Q9QUT0	Rhag	0.524905	0.0850296	0.977879	0.479711	0.207925	0.675358	0.04819	0.200189
UniRef100_Q3U8B3	Rpa1	0.983415	0.971538	0.510892	0.823986	0.882238	0.00255986	-0.127877	0.201302
UniRef100_P50615	Btg3	0.764514	0.364766	0.697078	0.605527	0.104029	0.988538	-0.0896994	0.20141
UniRef100_P35584	Foxa3	0.488357	0.973422	0.750995	0.500008	0.0131082	0.000590552	-0.218295	0.201816
UniRef100_E9QKT1	Ube3a	0.366587	0.542696	0.511148	0.0746436	0.116348	0.252142	0.183897	0.202125
UniRef100_Q61216	Mre11a	0.663815	0.305311	0.155043	0.606024	0.593405	0.391119	0.0552167	0.202481
UniRef100_E9QN32	Lhx6	0.570009	0.068998	0.36137	0.397898	0.2058	0.473161	-0.0545808	0.202935
UniRef100_B2RXY1	Spock1	0.406745	0.236035	0.852275	0.912152	0.0421775	0.291818	-0.115286	0.203097
UniRef100_Q8CFQ3	Aqr	0.857232	0.724113	0.559929	0.0689399	0.819546	0.46378	0.201818	0.203152
UniRef100_P51149	Rab7	0.343161	0.672881	0.0641715	0.718104	0.648981	0.47311	-0.137038	0.203478
UniRef100_Q07105	Gdf9	0.390215	0.472255	0.566962	0.577821	0.692943	0.00780881	-0.0881813	0.20356
UniRef100_D3YTT2	Nr1h4	0.920438	0.496568	0.425247	0.878718	0.269202	0.100984	0.091242	0.203643
UniRef100_P29752	Lalba	0.575691	0.394275	0.581117	0.676364	0.793566	0.491413	0.0548388	0.203719
UniRef100_Q07424	Cdx4	0.546562	0.351121	0.457878	0.224591	0.565814	0.460616	-0.0359329	0.203824
UniRef100_P35282	Rab21	0.762821	0.645384	0.78841	0.982313	0.765468	0.402743	0.0517909	0.204196
UniRef100_O70146	Tesk1	0.492459	0.602176	0.861906	0.69277	0.904316	0.00270421	0.134266	0.204298
UniRef100_Q62414	Neurod2	0.980084	0.44331	0.596794	0.00905949	0.0178529	0.87393	-0.375321	0.204889
UniRef100_Q5M9K2	Vamp5	0.50552	0.0847134	0.143861	0.92622	0.219975	0.920293	0.210306	0.205172
UniRef100_Q3UP87	Elane	0.239529	0.723853	0.768886	0.48618	0.835624	0.449263	-0.0538861	0.205606
UniRef100_Q9WTK5	Nfkb2	0.594818	0.660693	0.838946	0.81216	0.136888	0.775788	0.0558042	0.205838
UniRef100_Q16777	Hist2h2ac	0.290087	0.614994	0.234909	0.638474	0.0303905	0.0185898	-0.182027	0.205944
UniRef100_Q0VBD2	Mcm10	0.681349	0.229931	0.169498	0.0720019	0.0360291	0.0120668	-0.218486	0.205997
UniRef100_Q99LN9	Dohh	0.735424	0.669823	0.109474	0.753523	0.366406	0.882107	0.0959153	0.206168
UniRef100_Q80W94	Mogat2	0.256105	0.208159	0.109465	0.923748	0.0556955	0.191164	0.434805	0.206203
UniRef100_Q3U422	Ndufv3	0.846489	0.360376	0.591862	0.662248	0.459953	0.0133139	0.102573	0.206904
UniRef100_Q99LX0	Park7	0.75738	0.263779	0.607152	0.98838	0.552811	0.586314	-0.0617833	0.207168
UniRef100_O54707	Klrd1	0.432444	0.793027	0.693807	0.439695	0.00254618	0.0025156	-0.232764	0.207328
UniRef100_Q91Z67	Srgap2	0.661796	0.124172	0.610796	0.283453	0.481573	0.231521	-0.142746	0.207331
UniRef100_P01216	Cga	0.820527	0.375346	0.911428	0.758381	0.883592	0.335713	-0.0507361	0.207495
UniRef100_Q80U44	Zfyve16	0.288178	0.142793	0.707781	0.320007	0.0510652	0.236948	0.213129	0.207547
UniRef100_Q640M1	Utp14a	0.233799	0.841419	0.0566531	0.740633	0.338925	0.528244	0.22574	0.208263
UniRef100_Q61081	Cdc37	0.737237	0.846784	0.789075	0.843611	0.641722	0.315432	0.0490784	0.208279
UniRef100_O88705	Hcn3	0.955059	0.0124164	0.367244	0.050677	0.21173	0.864153	0.654341	0.208354
UniRef100_O54865	Gucy1b3	0.0733094	0.24587	0.371734	0.575111	0.217315	0.0507695	0.20141	0.208405
UniRef100_P99029	Prdx5	0.722	0.720685	0.299521	0.53227	0.589102	0.0282965	0.123007	0.208461
UniRef100_Q61153	Dio1	0.676823	0.299352	0.404676	0.314198	0.513686	0.345014	-0.0871098	0.209095
UniRef100_Q9D8X5	Cnot8	0.793638	0.12692	0.585586	0.541558	0.458341	0.370663	-0.045063	0.209474
UniRef100_E9Q6C4	Slc7a2	0.200835	0.263826	0.562747	0.993435	0.00806069	0.663395	-0.121991	0.209764
UniRef100_Q61184	Mtnr1a	0.66045	0.564006	0.524537	0.84283	0.218785	0.645363	-0.0592724	0.209841
UniRef100_O88829	St3gal5	0.235893	0.679166	0.738867	0.732821	0.946627	0.483762	0.0847528	0.210134
UniRef100_Q3UFS0	Zyg11b	0.0733707	0.0696152	0.866455	0.715917	0.058903	0.343249	0.316236	0.210208
UniRef100_P55065	Pltp	0.402009	0.340765	0.249327	0.209114	0.343802	0.832154	-0.133006	0.210485
UniRef100_P30730	Lhcgr	0.0137642	0.866564	0.593427	0.843197	0.626192	0.668528	0.209886	0.210784
UniRef100_P17553	Wnt3	0.783235	0.214541	0.605246	0.115707	0.486972	0.516836	-0.0421852	0.211099
UniRef100_Q6QIY3	Scn10a	0.0379694	0.915598	0.492554	0.380331	0.0975333	0.80431	-0.262108	0.211522
UniRef100_Q9EQX0	Ghrl	0.264043	0.858493	0.470076	0.660335	0.515181	0.82751	-0.0646627	0.211586
UniRef100_A1L358	Mzf1	0.39656	0.850087	0.0124013	0.347316	0.181066	0.355012	-0.343025	0.212371
UniRef100_P13745	Gsta1	0.393412	0.265155	0.655038	0.706716	0.00480193	0.00408711	0.25739	0.212858
UniRef100_Q9CQU0	Txndc12	0.796585	0.394391	0.918958	0.836168	0.969791	0.0406286	-0.106407	0.21296
UniRef100_Q8VEE0	Rpe	0.850794	0.579262	0.0744656	0.800807	0.296276	0.36479	0.14174	0.21311
UniRef100_B1AZ45	Baiap2	0.818777	0.932309	0.932147	0.998214	0.545147	0.527806	-0.0330546	0.213134
UniRef100_Q7TNT5	Ascl1	0.795144	0.722314	0.18605	0.0536833	0.0750206	0.238206	-0.230024	0.213494
UniRef100_P00342	Ldhc	0.887622	0.41076	0.996552	0.495642	0.751651	0.327705	0.0378054	0.213872
UniRef100_P60122	Ruvbl1	0.235665	0.329203	0.613877	0.647839	0.862362	0.380862	-0.0495255	0.214093
UniRef100_P56475	Gabrr1	0.000671642	0.379352	0.40596	0.15893	0.195096	0.839666	0.479507	0.214686
UniRef100_Q91VH6	Memo1	0.603192	0.210152	0.821413	0.571514	0.650201	0.473982	0.0581709	0.21477
UniRef100_O70228	Atp9a	0.872081	0.937355	0.76086	0.679095	0.711624	0.148728	0.0743073	0.214975
UniRef100_P70447	Neurog2	0.972821	0.413536	0.30001	0.42586	0.492069	0.454773	-0.0542911	0.215249
UniRef100_Q99J27	Slc33a1	0.33136	0.978503	0.791634	0.885102	0.252558	0.966056	0.0570457	0.215827
UniRef100_Q9Z125	Creb3l1	0.171866	0.23778	0.0465073	0.812792	0.790964	0.135686	-0.23839	0.216024
UniRef100_Q9CPY7	Lap3	0.096317	0.99778	0.0773185	0.900846	0.464604	0.874202	0.281295	0.21647
UniRef100_Q923D5	Wbp11	0.567088	0.92564	0.546354	0.4899	0.430084	0.909	0.0577027	0.216667
UniRef100_Q80Y17	Llgl1	0.570453	0.921407	0.277771	0.608138	0.367008	0.618075	0.0552886	0.216759
UniRef100_Q02576	Nhlh1	0.106445	0.654084	0.635712	0.59518	0.251377	0.528287	-0.136518	0.217033
UniRef100_Q07279	Nfe2	0.0503328	0.676232	0.109628	0.510193	0.989222	0.126686	0.273015	0.217092
UniRef100_P70122	Sbds	0.761988	0.672091	0.486175	0.809267	0.294491	0.0226013	0.105225	0.217884
UniRef100_Q3TRA1	Fmo5	0.957939	0.0599876	0.130824	0.437478	0.409788	0.393432	0.410327	0.217919
UniRef100_Q9CZ19	Myl4	0.388407	0.490436	0.0691696	0.771037	0.462218	0.309505	-0.158428	0.217995
UniRef100_Q8CB46	Map2k2	0.491652	0.83836	0.401579	0.635377	0.264069	0.0785128	0.109994	0.218008
UniRef100_Q80UM7	Mogs	0.808874	0.651352	0.546888	0.720238	0.688836	0.0228496	-0.14337	0.218031
UniRef100_Q9R049-2	Amfr	0.851379	0.297111	0.416871	0.954577	0.225046	0.851808	0.0560793	0.218073
UniRef100_Q8BG51	Rhot1	0.898773	0.856276	0.711689	0.774889	0.113283	0.81448	0.0632286	0.218125
UniRef100_Q03963	Eif2ak2	0.297365	0.115386	0.263597	0.188948	0.178057	0.153515	-0.244592	0.218525
UniRef100_Q3ZB48	Htr1d	0.2867	0.67979	0.867816	0.564854	0.88007	0.279477	0.0568739	0.218531
UniRef100_P10852	Slc3a2	0.515627	0.359603	0.0390664	0.803837	0.942389	0.178228	0.271591	0.218853
UniRef100_Q91Z92	B3galt6	0.431986	0.890818	0.907863	0.407458	0.220057	0.825443	0.0528595	0.219852
UniRef100_Q9QYA2	Tomm40	0.143512	0.952414	0.56015	0.61121	0.523749	0.0513729	0.0828365	0.219958
UniRef100_Q9D826	Pipox	0.907437	0.804789	0.250076	0.758909	0.00741328	0.364787	0.132732	0.220452
UniRef100_P97327	Fut1	0.460331	0.0607543	0.326673	0.493007	0.363806	0.472506	0.211977	0.220499
UniRef100_P17919	Hoxb1	0.263278	0.445765	0.410968	0.597276	0.623443	0.3586	-0.0391872	0.2207
UniRef100_Q497N4	Sh3gl3	0.620457	0.913743	0.710246	0.0279203	0.54633	0.342004	-0.235157	0.220844
UniRef100_P53351	Plk2	0.887733	0.2893	0.809038	0.806681	0.071087	0.575284	-0.0884134	0.221408
UniRef100_Q8R5K2	Usp33	0.363578	0.962297	0.148667	0.530349	0.155382	0.710122	0.0493086	0.221607
UniRef100_Q63ZW6	Col4a5	0.377486	0.431947	0.396564	0.0525581	0.959198	0.954809	-0.252268	0.22203
UniRef100_Q149T1	Sh2d1b1	0.121793	0.923608	0.935884	0.404207	0.837194	0.484151	0.0555147	0.222048
UniRef100_Q6SJQ0	Cd300a	0.409306	0.724517	0.869942	0.955575	0.908117	0.378917	0.0343521	0.222464
UniRef100_P15702	Spn	0.968799	0.615058	0.137847	0.395442	0.414461	0.498963	-0.031963	0.222607
UniRef100_Q9CX47	Xrcc2	0.290792	0.0699322	0.966704	0.679519	0.0618226	0.545096	0.307981	0.22281
UniRef100_E9Q1V9	Camk2d	0.611702	0.654109	0.78266	0.528096	0.0136981	0.872588	0.100747	0.223063
UniRef100_Q00690	Sele	0.115804	0.144355	0.597978	0.343122	0.323993	0.411682	-0.350574	0.223425
UniRef100_Q08460	Kcnma1	0.201691	0.910086	0.129938	0.899594	0.86768	0.718938	0.127922	0.223762
UniRef100_Q3TW36	Skiv2l	0.992653	0.646658	0.539968	0.626003	0.406915	0.889854	0.0418513	0.224209
UniRef100_Q6UXN9	Wdr82	0.58058	0.418294	0.206573	0.744375	0.493494	0.340026	-0.0405266	0.224441
UniRef100_Q61096	Prtn3	0.0995063	0.0229811	0.177846	0.230609	0.479563	0.474745	0.544177	0.224606
UniRef100_O55137	Acot1	0.67966	0.458339	0.945419	0.78842	0.00842337	0.492914	-0.124414	0.224857
UniRef100_O55040	Nmur1	0.994084	0.125299	0.172729	0.433885	0.258311	0.761727	0.24632	0.225011
UniRef100_A2AEE7	Celsr2	0.060831	0.577912	0.958287	0.66772	0.0843289	0.900597	-0.156699	0.225608
UniRef100_Q9Z1Y9	Dio2	0.867505	0.937315	0.48197	0.320512	0.436481	0.898838	0.062975	0.225665
UniRef100_Q10738	Mmp7	0.22829	0.0195406	0.325424	0.603503	0.696789	0.420768	-0.425035	0.226551
UniRef100_Q9Z2I2	Fkbp1b	0.416038	0.200156	0.718687	0.464512	0.0852833	0.952749	-0.099094	0.226637
UniRef100_Q923B3	Zfp110	0.476718	0.291052	0.404753	0.759098	0.268576	0.874659	0.064168	0.227274
UniRef100_Q62481	Vps72	0.55545	0.0829659	0.631588	0.866716	0.594362	0.376641	0.0652395	0.227441
UniRef100_P51612	Xpc	0.576882	0.494627	0.666511	0.831438	0.226107	0.00410951	0.126265	0.227716
UniRef100_Q9Z262	Cldn6	0.622206	0.187623	0.835298	0.233317	0.0491362	0.527852	-0.190521	0.228052
UniRef100_Q8CIH5	Plcg2	0.2431	0.441199	0.154958	0.859533	0.315101	0.0221832	-0.217869	0.228496
UniRef100_P97414	Kcnq1	0.762226	0.377989	0.984708	0.57993	0.030447	0.873935	0.0860143	0.228695
UniRef100_Q9QZ26	Kcne1l	0.226427	0.44677	0.592836	0.28441	0.104833	0.816297	-0.123505	0.22872
UniRef100_B2C3G8	Stat5a	0.692796	0.0601733	0.272214	0.592313	0.916874	0.662271	-0.1965	0.229734
UniRef100_Q9WV85	Nme3	0.656055	0.0842966	0.398361	0.976574	0.170584	0.00156986	0.1359	0.230119
UniRef100_Q3U1J0	Slc38a5	0.965361	0.32441	0.799483	0.970424	0.109122	0.787523	-0.0784967	0.230378
UniRef100_Q8K3W3	Casc3	0.762444	0.468763	0.933816	0.812708	0.622813	0.0496228	0.115862	0.230601
UniRef100_P97789	Xrn1	0.350513	0.423326	0.00194382	0.483084	0.00735025	0.319517	0.646473	0.230692
UniRef100_P18872	Gnao1	0.769267	0.854701	0.606969	0.306468	0.40354	0.570003	0.0289989	0.230958
UniRef100_Q61288	Acvrl1	0.379536	0.212786	0.815655	0.801852	0.926359	0.185792	-0.0536715	0.232947
UniRef100_P61750	Arf4	0.927929	0.598304	0.712594	0.787326	0.629082	0.248557	-0.0506955	0.233392
UniRef100_P56484	Ccr8	0.411879	0.551457	0.526017	0.140237	0.244805	0.694345	0.180459	0.233664
UniRef100_B5B2P7	Nfatc2	0.698367	0.805274	0.348109	0.676712	0.764882	0.387303	-0.0306459	0.233921
UniRef100_Q8BJW6	Eif2a	0.884602	0.868023	0.485233	0.950524	0.953531	0.0606976	-0.113784	0.233995
UniRef100_Q9D2M8	Ube2v2	0.451766	0.628071	0.185648	0.702557	0.0735426	0.419687	0.0994712	0.234464
UniRef100_Q60720	Cyb561	0.718662	0.587763	0.849011	0.530779	0.807499	0.364199	-0.0586562	0.235153
UniRef100_E9PVV1	Tcf3	0.706349	0.0171665	0.286928	0.991074	0.584478	0.183523	0.351893	0.235225
UniRef100_Q61767	Hsd3b4	0.311315	0.0601258	0.771226	0.12853	0.362742	0.847532	-0.357819	0.235903
UniRef100_E9PU89	Igf1	0.708838	0.899965	0.737083	0.418087	0.573283	0.443339	0.0411269	0.236041
UniRef100_Q8BLF6	Idua	0.30157	0.478907	0.463498	0.967156	0.139862	0.910747	0.0695785	0.236286
UniRef100_P55098	Pxmp3	0.644248	0.458999	0.414014	0.778063	0.614421	0.443743	0.0471861	0.236483
UniRef100_P70181	Pip5k1b	0.445274	0.580885	0.0296527	0.297742	0.261524	0.71471	-0.169017	0.236626
UniRef100_P13634	Car1	0.747144	0.339622	0.0658114	0.889844	0.493483	0.729518	-0.0453152	0.236718
UniRef100_P01580	Ifng	0.401877	0.0942966	0.0334692	0.494699	0.325673	0.964968	0.383055	0.237113
UniRef100_P45700	Man1a	0.726637	0.627746	0.124966	0.771405	0.180696	0.576062	0.0527774	0.237168
UniRef100_Q8C4J7	Tbl3	0.478754	0.64321	0.666299	0.371079	0.675697	0.140954	0.0896754	0.237207
UniRef100_Q01097	Grin2b	0.556219	0.220545	0.250071	0.616544	0.132172	0.985701	-0.0817561	0.237208
UniRef100_Q9D0R2	Tars	0.466341	0.393155	0.665325	0.939069	0.68048	0.571942	-0.0534436	0.237912
UniRef100_Q969T4	Ube2e3	0.953137	0.737586	0.861078	0.759349	0.0456786	0.858259	0.078364	0.237924
UniRef100_Q9CQD8	Atp6v0e	0.781939	0.813898	0.352524	0.714697	0.682899	0.0114327	0.115649	0.2382
UniRef100_O88819	Fut9	0.610745	0.553611	0.553502	0.973459	0.00139607	0.413079	0.167113	0.238938
UniRef100_P23772	Gata3	0.101239	0.66351	0.11607	0.754289	0.00705286	0.39074	0.323696	0.239012
UniRef100_O08791	Ebf3	0.384184	0.0480792	0.775794	0.0829366	0.176768	0.390158	-0.38241	0.239111
UniRef100_Q61830	Mrc1	0.559059	0.894275	0.00234545	0.512038	0.595234	0.140908	-0.432717	0.23917
UniRef100_Q9DCN2	Cyb5r3	0.821954	0.00127467	0.0841215	0.73971	0.834487	0.420397	0.818521	0.239519
UniRef100_Q9D864	Actr6	0.520943	0.112801	0.0165674	0.286618	0.607307	0.456427	-0.254895	0.240353
UniRef100_Q62066	Phox2a	0.134265	0.948503	0.606756	0.244004	0.935811	0.449802	0.180945	0.240536
UniRef100_P56473	Agrp	0.83931	0.837707	0.8812	0.0118256	0.362469	0.0593208	0.299028	0.240671
UniRef100_Q64735	Cr1l	0.260454	0.488943	0.181247	0.152565	0.0116264	8.11e-06	0.226034	0.241205
UniRef100_P63006	Lhx1	0.588448	0.785022	0.426318	0.00155165	0.538696	0.365999	0.420314	0.241463
UniRef100_O09110	Map2k3	0.156674	0.679814	0.0750369	0.451511	0.0644327	0.53426	0.34181	0.242329
UniRef100_P70390	Shox2	0.144735	0.478447	0.716362	0.593154	0.536768	0.700483	-0.0491488	0.243017
UniRef100_Q9Z0S1	Bpnt1	0.300916	0.03908	0.0328048	0.820893	0.51434	0.000678555	0.606751	0.243199
UniRef100_P79621	Ciita	0.292142	0.114254	0.735165	0.361566	0.490559	0.0280988	-0.22524	0.243829
UniRef100_Q3UBK0	Clec4d	0.0303319	0.976466	0.804989	0.255489	0.538728	0.721863	-0.362132	0.244699
UniRef100_P53996	Cnbp	0.509479	0.545126	0.187294	0.752812	0.773908	0.295421	-0.0425919	0.244796
UniRef100_Q9DBE9	Ftsj3	0.998852	0.00515991	0.862897	0.721873	0.262419	0.946745	0.650697	0.244818
UniRef100_Q07813	Bax	0.904563	0.458591	0.90307	0.846215	0.699021	0.115148	0.0699435	0.24495
UniRef100_Q3UD03	Npepl1	0.810953	0.519144	0.501049	0.742028	0.971068	0.00362711	0.129223	0.245318
UniRef100_Q60823	Akt2	0.683088	0.969115	0.896646	0.858805	0.877683	0.100814	-0.0525852	0.245352
UniRef100_A0T1J8	Lmo7	0.446326	0.13248	0.206277	0.669415	0.00031192	0.905047	0.197432	0.245463
UniRef100_Q8C375	Cdh8	0.86466	0.435269	0.460584	0.595309	0.602558	0.517269	-0.0296617	0.245631
UniRef100_D3Z2R1	Pard6a	0.9722	0.73254	0.047474	0.719714	0.250133	0.308401	0.186242	0.245705
UniRef100_O88508	Dnmt3a	0.594427	0.65387	0.046189	0.200206	0.744424	0.140498	0.180256	0.246202
UniRef100_Q3TCU5	Tapbp	0.271727	0.857492	0.158816	0.370508	0.0547122	0.980106	0.116977	0.246233
UniRef100_Q3TUE1	Fubp1	0.57749	0.754757	0.517183	0.459329	0.0482561	0.918136	-0.0744407	0.246503
UniRef100_E9PUE2	Usp21	0.67524	0.396602	0.969749	0.508978	0.730011	0.372001	0.0447672	0.246835
UniRef100_Q62087	Pon3	0.400416	0.639064	0.47621	0.802576	0.234497	0.784966	-0.0718598	0.246968
UniRef100_Q61658	Hesx1	0.403226	0.00527691	0.728664	0.504231	0.656738	0.89561	0.581786	0.246977
UniRef100_O55070	Dnase1l3	0.990164	0.968569	0.00760956	0.97017	0.207422	0.347743	-0.234257	0.247169
UniRef100_P26687	Twist1	0.930847	0.569938	0.302937	0.512147	0.481108	0.48595	0.0650273	0.247221
UniRef100_O70404	Vamp8	0.744	0.349749	0.0566159	0.299084	0.414087	0.0692712	0.159396	0.247345
UniRef100_Q8CFE6	Slc38a2	0.139813	0.896181	0.358586	0.851228	0.201857	0.386678	0.190869	0.247979
UniRef100_O88572	Lrp6	0.582084	0.257235	0.281467	0.666574	0.434643	0.721924	0.0394566	0.248334
UniRef100_Q7TN29	Smap2	0.763139	0.861641	0.330786	0.866576	0.0833817	0.618921	0.0825459	0.248665
UniRef100_Q8VCG1	Dut	0.152857	0.715682	0.467354	0.593863	0.633896	0.599057	-0.0534234	0.24894
UniRef100_P27641	Xrcc5	0.774887	0.18235	0.495447	0.353143	0.394672	0.686153	0.0465711	0.249342
UniRef100_Q8BJY1	Psmd5	0.33215	0.187027	0.0543259	0.913838	0.272326	0.0968674	-0.19575	0.249511
UniRef100_P17125	Tgfb3	0.691103	0.0367358	0.763206	0.639841	0.150029	0.982333	0.289944	0.250524
UniRef100_B7ZN95	Cacna1c	0.264148	0.780721	0.927506	0.821225	0.00234573	0.654027	0.111134	0.250647
UniRef100_P41133	Id3	0.638154	0.286992	0.0224863	0.694241	0.125699	0.194979	0.205117	0.250887
UniRef100_O08603	Raet1b	0.711956	0.131259	0.948619	0.201479	0.143507	0.174436	-0.126047	0.251244
UniRef100_Q8C4R2	Prkg2	0.809229	0.465942	0.166431	0.924001	0.931604	0.0298406	0.270525	0.251634
UniRef100_P62314	Snrpd1	0.938068	0.82541	0.875791	0.594536	0.521206	0.798442	0.0590854	0.251678
UniRef100_Q9DCM2	Gstk1	0.0787045	0.75667	0.094006	0.794571	7.23e-06	0.00885938	-0.298945	0.251814
UniRef100_P70327	Tbx6	0.515535	0.0642659	0.850262	0.749705	0.209966	0.192678	-0.16582	0.253522
UniRef100_Q9CXP8	Gng10	0.448779	0.63178	0.122748	0.340698	0.133542	0.421328	-0.12356	0.254646
UniRef100_P30554	Mas1	0.377177	0.666694	0.777176	0.234947	0.182838	0.596191	-0.0477698	0.254906
UniRef100_Q9R043	Ccl17	0.989185	0.323067	0.326852	0.925971	0.297455	0.867291	-0.0571411	0.256161
UniRef100_Q9D275	Batf3	0.610731	0.0364918	0.958657	0.304156	0.166121	0.281168	-0.277377	0.256176
UniRef100_P63261	Actg1	0.331252	0.29054	0.973649	0.932339	0.00600346	0.909692	0.0868109	0.256488
UniRef100_Q3UGS3	Mbd4	0.947128	0.931694	0.307115	0.792626	0.207729	0.00357858	-0.0920229	0.25668
UniRef100_A2RST1	Mgst2	0.690934	0.552437	0.235553	0.830865	0.0368645	0.0292027	-0.107303	0.257224
UniRef100_P60866	Rps20	0.217363	0.230453	0.992761	0.922007	0.142469	0.961039	0.0582475	0.257601
UniRef100_P61964	Wdr5	0.751494	0.917517	0.933211	0.34495	0.0360595	0.681211	0.0805343	0.257601
UniRef100_O70293	Grk6	0.143119	0.618765	0.281189	0.97437	0.893957	0.764699	-0.0372116	0.257675
UniRef100_Q9D7P7	Clic3	0.0564788	0.529973	0.625141	0.392485	0.990692	0.857217	0.205882	0.257756
UniRef100_P97329	Kif20a	0.895205	0.616778	0.548049	0.24464	0.375709	0.828457	-0.0644226	0.258763
UniRef100_Q61168	Laptm5	0.231076	0.0247311	0.0107127	0.475852	0.805384	0.323205	-0.455817	0.258849
UniRef100_O35984	Pbx2	0.227561	0.904554	0.360803	0.196516	0.0208559	0.736943	0.123361	0.258936
UniRef100_Q9WVT6	Car14	0.230763	0.443161	0.0859279	0.840144	0.152057	0.501271	0.179818	0.25927
UniRef100_Q7M6Y2	Sox11	0.295408	0.851046	0.619784	0.0946632	0.774894	0.598342	-0.147354	0.259779
UniRef100_P42586	Nkx2-2	0.761593	0.00467177	0.0970646	0.867045	0.242088	0.749264	0.617422	0.25981
UniRef100_P26350	Ptma	0.673655	0.819781	0.483485	0.892013	0.595993	0.000411023	-0.178802	0.259923
UniRef100_Q91VU9	Gosr1	0.767753	0.37816	0.525203	0.201495	0.99862	0.311998	0.0532964	0.259947
UniRef100_P28652	Camk2b	0.81616	0.244497	0.658736	0.461279	0.00400074	0.911753	-0.109285	0.260242
UniRef100_E9Q6Y6	Tmprss15	0.285885	0.0198638	0.741966	0.0596912	0.82966	0.258768	-0.546878	0.260306
UniRef100_Q9CQW9	Ifitm3	0.129269	0.304652	0.26525	0.14673	0.317748	0.00249112	-0.372848	0.26069
UniRef100_P48540	Gdnf	0.219439	0.563267	0.837099	0.469012	0.152398	0.815642	-0.0694316	0.260981
UniRef100_Q8C0M9	Asrgl1	0.411314	0.626451	0.864692	0.232081	0.0567821	0.490447	0.109165	0.261531
UniRef100_Q8K0L9	Zbtb20	0.223088	0.63181	0.383778	0.946831	0.0295003	0.317797	0.160699	0.26182
UniRef100_P35569	Irs1	0.189309	0.659373	0.952416	0.460853	0.125227	0.522278	-0.110005	0.261825
UniRef100_P21812	Mcpt4	0.0291722	0.535266	0.192455	0.25101	0.656461	0.0430659	-0.520629	0.261848
UniRef100_A2A840	Epb4.1	0.197094	0.345073	0.238703	0.596754	0.342716	0.0945127	-0.11057	0.261851
UniRef100_Q8BGE5	Fancm	0.90712	0.14527	0.331832	0.678332	0.608246	0.452605	-0.0296664	0.262003
UniRef100_Q9DD18	Dtd1	0.805411	0.510845	0.24891	0.169246	0.917402	0.885999	0.090543	0.262834
UniRef100_Q17S11	Smarcb1	0.673465	0.755267	0.18347	0.832224	0.662605	0.828411	0.0545539	0.262917
UniRef100_P07628	Klk1b8	0.500963	0.0615392	0.943887	0.406466	0.159339	0.743991	-0.292649	0.263109
UniRef100_E9QM38	Slc12a2	0.31712	0.70344	0.248435	0.965873	0.693212	0.413297	0.0377431	0.263656
UniRef100_P70205	Adcyap1r1	0.466454	0.637432	0.419995	0.0449669	0.510056	0.257095	-0.224279	0.263764
UniRef100_Q91XF0	Pnpo	0.58973	0.61966	0.622893	0.48734	0.00514104	0.982587	-0.131662	0.264282
UniRef100_P21844	Cma1	0.0881347	0.853831	0.6467	0.263467	0.645572	0.623382	-0.203903	0.264815
UniRef100_Q02788	Col6a2	0.69598	0.732034	0.128865	0.688311	0.520024	0.811028	-0.0361864	0.264886
UniRef100_A2ACT7	Col9a3	0.314522	0.771219	0.318534	0.0564647	0.174891	0.870828	0.216415	0.265013
UniRef100_P48755	Fosl1	0.158274	0.420602	0.424366	0.931379	0.389594	0.67724	-0.0414866	0.265592
UniRef100_E9PYD5	Tcea1	0.577715	0.823712	0.210647	0.415583	0.556811	0.0913244	-0.0761375	0.265883
UniRef100_P47873	Il11	0.961433	0.682135	0.532861	0.0215051	0.0956239	0.989037	0.375276	0.265898
UniRef100_Q64467	Gapdhs	0.702607	0.0493032	0.603078	0.338464	0.111474	0.411029	-0.294786	0.266951
UniRef100_Q9Z126	Pf4	0.630613	0.201327	0.158815	0.428297	0.12832	0.582406	-0.1207	0.267186
UniRef100_E9Q2I3	Ppm1m	0.939749	0.600168	0.0945126	0.181254	0.980984	0.762044	-0.149852	0.267374
UniRef100_Q9DBE0	Csad	0.728643	0.015823	0.876326	0.795171	0.164059	0.788311	0.476553	0.267518
UniRef100_O08914	Faah	0.683457	0.564907	0.0639908	0.901183	0.0685792	0.502747	0.1739	0.267637
UniRef100_A2APL7	Slc1a2	0.813352	0.0868121	0.0782966	0.734577	0.0801856	0.471209	0.299101	0.267848
UniRef100_P50427	Sts	0.765989	0.425024	0.727525	0.00544516	0.342886	0.580219	-0.426021	0.268025
UniRef100_P52850	Ndst2	0.466865	0.0153314	0.659579	0.751668	0.115026	0.146462	0.389268	0.268205
UniRef100_O35153	Bet1l	0.755596	0.779141	0.937163	0.912025	0.0098119	0.928058	-0.0835764	0.268458
UniRef100_Q9JHF5	Tcirg1	0.4374	0.930996	0.346794	0.218618	0.410788	0.0215072	-0.0992762	0.268614
UniRef100_P47791	Gsr	0.499733	0.531846	0.020584	0.527214	0.553233	0.0489447	-0.199358	0.268831
UniRef100_P60228	Eif3e	0.405429	0.0728204	0.874832	0.594821	0.247274	0.642976	0.189316	0.2691
UniRef100_Q3UMT7	Hnrnpl	0.716135	0.284358	0.113136	0.80595	0.773527	0.391547	-0.103444	0.269173
UniRef100_Q9CZU6	Cs	0.568411	0.922833	0.696048	0.961462	0.198712	0.801845	0.0486921	0.26933
UniRef100_Q9EQR3	Kcnn1	0.850117	0.49394	0.163039	0.377014	0.0826895	0.471822	0.191712	0.269393
UniRef100_Q61835	Fxyd3	0.765828	0.41008	0.575863	0.893542	0.385315	0.00606357	-0.142472	0.269705
UniRef100_Q3TDV8	Zfp444	0.981391	0.897849	0.771771	0.656198	0.39746	0.903648	-0.037277	0.269767
UniRef100_Q8R0X7	Sgpl1	0.665275	0.359635	0.465689	0.741992	0.556321	0.763328	0.0500651	0.270479
UniRef100_Q9QZB9	Dctn5	0.807688	0.995499	0.841759	0.768164	0.379575	0.742683	0.0421284	0.27062
UniRef100_P61020	Rab5b	0.372901	0.409132	0.340907	0.774341	0.324055	0.0195011	0.0960949	0.270822
UniRef100_P47915	Rpl29	0.983739	0.548984	0.0340637	0.705563	0.431165	0.214059	-0.32861	0.27088
UniRef100_Q3UN02	Lclat1	0.548741	0.411846	0.325732	0.878726	0.653779	0.348781	0.0367805	0.271468
UniRef100_P52927	Hmga2	0.301818	0.83127	0.68699	0.828032	0.23431	0.938782	0.0599129	0.271606
UniRef100_P29477	Nos2	0.582501	0.248901	0.16556	0.633382	0.0285861	0.454471	-0.177904	0.271683
UniRef100_P18911	Rarg	0.044695	0.241758	0.469102	0.330928	0.870082	0.359736	-0.234264	0.27179
UniRef100_Q60943	Il17ra	0.316885	0.251178	0.16655	0.0245105	0.80259	0.123836	-0.259631	0.273229
UniRef100_O54798	Brs3	0.882144	0.29138	0.0736069	0.609872	0.926774	0.846402	0.188652	0.273367
UniRef100_O55237	Cd70	0.184172	0.790283	0.757239	0.211189	0.168276	0.86304	0.164794	0.273891
UniRef100_P70166	Cpeb1	0.0213995	0.686688	0.640843	0.692216	0.633877	0.347406	-0.260096	0.273937
UniRef100_Q9Z0P5	Twf2	0.307355	0.264199	0.269727	0.873558	0.18578	0.906759	-0.0600829	0.273983
UniRef100_P09022	Hoxa1	0.86036	0.553358	0.54999	0.15077	0.620335	0.788126	-0.0423093	0.274016
UniRef100_Q8VCG4	C8g	0.978211	0.267822	0.227456	0.813118	0.0986362	0.555076	-0.0929734	0.274653
UniRef100_P51437	Camp	0.980738	0.139345	0.63142	0.191349	0.799255	0.227487	-0.199889	0.274794
UniRef100_P55104	Inhbc	0.755734	0.917287	0.74223	0.968634	0.0581368	0.979931	-0.0660298	0.275138
UniRef100_Q9WUP7	Uchl5	0.735306	0.951277	0.327401	0.899069	0.713349	0.235227	-0.0994769	0.275199
UniRef100_O88544	Cops4	0.771602	0.151954	0.731247	0.797668	0.406376	0.639434	0.0458058	0.275515
UniRef100_O55055	Trdmt1	0.763096	0.00192045	0.961927	0.470302	0.711502	0.0340949	0.652964	0.276108
UniRef100_Q9R229	Bmp10	0.930961	0.171175	0.491394	0.348918	0.897484	0.331844	0.0292962	0.276482
UniRef100_E9PZ16	Hspg2	0.5247	0.545098	0.689942	0.319422	0.797635	0.00496467	-0.170029	0.276797
UniRef100_P97438	Kcnk2	0.946252	0.0159086	0.80732	0.363583	0.257956	0.716567	-0.541259	0.276857
UniRef100_Q64285	Cel	0.320286	0.19358	0.86054	0.215204	0.236791	0.581295	0.309325	0.276861
UniRef100_P04627	Araf	0.387639	0.358724	0.741513	0.704323	0.593873	0.0213997	0.0578754	0.27716
UniRef100_Q80VX2	Cd200	0.129569	0.788929	0.406809	0.52874	0.136908	0.938525	0.0883956	0.277713
UniRef100_P43023	Cox6a2	0.30911	0.642152	0.295759	0.460993	0.0644099	0.605499	-0.110295	0.277915
UniRef100_Q9D5L7	Spsb1	0.860819	0.485958	0.0688737	0.746251	0.873432	0.933083	0.125986	0.278075
UniRef100_P70120	Hes5	0.219779	0.0632922	0.438747	0.798465	0.28655	0.483396	-0.210575	0.278215
UniRef100_P50296	Nat3	0.769824	0.191879	0.656496	0.760952	0.831653	0.0976596	0.0575159	0.278343
UniRef100_P13379	Cd5	0.00934704	0.53823	0.838151	0.77633	0.764805	0.618617	0.2848	0.278691
UniRef100_F2Z3Y2	Gpx5	0.288584	0.385909	0.432923	0.783021	0.840901	0.483327	0.0319422	0.279405
UniRef100_Q08652	Rbp2	0.220166	0.118406	0.291918	0.930906	0.000171937	0.00281749	0.361075	0.279501
UniRef100_Q6P9R1	Ddx51	0.455507	0.26616	0.412814	0.93895	0.320942	0.974431	0.0556763	0.280181
UniRef100_P11835	Itgb2	0.50952	0.711769	0.625363	0.554201	0.812611	0.344014	-0.0505494	0.280314
UniRef100_P50171	H2-Ke6	0.320328	0.720633	0.334128	0.501632	0.873713	0.0130258	0.131103	0.280556
UniRef100_Q3UG22	Tgfbr2	0.901561	0.930387	0.0266565	0.508688	0.3716	0.889504	0.263921	0.28155
UniRef100_Q7TT28	Rexo1	0.930596	0.398042	0.707496	0.465996	0.412447	0.780037	-0.0378603	0.281684
UniRef100_Q2KHL7	Icam5	0.130281	0.254302	0.707049	0.512677	0.201798	0.094943	-0.189786	0.281755
UniRef100_P30728	Drd3	0.00610483	0.303921	0.778026	0.301084	0.0075325	0.224534	-0.305719	0.28217
UniRef100_O88958	Gnpda1	0.907388	0.525472	0.133332	0.588025	0.831305	0.16215	0.0954073	0.282205
UniRef100_Q8BIW1	Prune	0.971448	0.132111	0.727788	0.719738	0.622676	0.274503	0.0573082	0.282613
UniRef100_P15327	Bpgm	0.312992	0.050801	0.456174	0.97778	0.139072	0.723737	0.246732	0.282696
UniRef100_Q32NY6	Nr2f1	0.592962	0.170379	0.303258	0.766884	0.0483915	0.866163	0.0797123	0.282928
UniRef100_Q80V86	Ints8	0.485842	0.118995	0.454771	0.531606	0.411902	0.0923327	-0.124531	0.28305
UniRef100_Q60900	Elavl3	0.363621	0.688302	0.145878	0.512964	0.554308	0.545487	-0.0303496	0.28342
UniRef100_Q9Z1B8	Phf1	0.897281	0.079741	0.711119	0.573992	0.160616	0.531397	0.0832266	0.283578
UniRef100_Q9CQZ7	Polr3k	0.518206	0.101058	0.373639	0.420289	0.788263	0.61758	-0.0665854	0.283623
UniRef100_Q921Y2	Imp3	0.851724	0.778726	0.936776	0.741382	0.868683	0.00443815	0.0953793	0.284339
UniRef100_P35917	Flt4	0.843339	0.149129	0.989332	0.0908704	0.82365	0.278631	0.179878	0.2846
UniRef100_P62310	Lsm3	0.263221	0.749532	0.237483	0.6428	0.0215226	0.784604	0.101113	0.284612
UniRef100_P46467	Vps4b	0.429793	0.889964	0.0457577	0.638303	0.552436	0.148628	-0.169418	0.284621
UniRef100_Q60813	Adam1a	0.18506	0.00360216	0.82999	0.56832	0.550353	0.619681	0.555687	0.28463
UniRef100_P47713	Pla2g4a	0.594608	0.319195	0.0584412	0.971316	0.703076	0.995935	-0.244454	0.284853
UniRef100_Q8K0E3	Slc5a11	0.398161	0.778886	0.000181483	0.969589	0.456772	0.939253	0.527285	0.285218
UniRef100_P59158	Slc12a3	0.396564	0.160668	0.732354	0.65352	0.439999	0.915813	-0.0718953	0.285413
UniRef100_P12813	Nr4a1	0.355291	0.756552	0.258274	0.435041	0.103849	0.562134	0.148382	0.285738
UniRef100_P09690	Chrnb1	0.274976	0.724253	0.399143	0.635786	0.97096	0.00471674	0.13828	0.286169
UniRef100_Q8R2U6	Nudt4	0.694657	0.0724782	0.160886	0.560021	0.60872	0.599871	-0.0889666	0.286448
UniRef100_Q80UL5	Dkk1	0.327291	0.760514	0.0303901	0.674672	0.408466	0.867102	0.268176	0.286488
UniRef100_P60880	Snap25	0.35088	0.0285608	0.443992	0.980274	0.100351	0.758799	-0.377601	0.286521
UniRef100_Q8R3L5	Slco3a1	0.562786	0.0168794	0.699887	0.712255	0.807251	0.692044	-0.409567	0.286626
UniRef100_P18893	Il10	0.245662	0.347469	0.113418	0.187432	0.589677	0.103659	0.243077	0.286653
UniRef100_Q8K419	Lgals4	0.68105	0.704559	0.593539	0.663072	0.238571	0.00136122	0.0810366	0.286694
UniRef100_B2RXC6	Polr3a	0.369464	0.094864	0.0974067	0.380888	0.285006	0.0674198	-0.284593	0.287068
UniRef100_P54310	Lipe	0.781858	0.761841	0.00727037	0.501024	0.208272	0.955758	0.309744	0.287105
UniRef100_Q78T27	Ceacam9	0.0740225	0.149761	0.671843	0.564518	0.78229	0.458496	-0.251302	0.287413
UniRef100_Q91XH5	Spr	0.641248	0.712681	0.678613	0.672637	0.0544267	0.00201885	0.155954	0.287912
UniRef100_Q62120	Jak2	0.489654	0.0526161	0.837809	0.776164	0.00169897	0.353722	0.280091	0.288634
UniRef100_O54879	Hmgb3	0.936691	0.953954	0.68964	0.486864	0.230954	0.915445	0.0515763	0.289224
UniRef100_Q61850	Foxc2	0.740995	0.146812	0.409819	0.154444	0.484984	0.781425	-0.212165	0.289541
UniRef100_P50716	Defa-rs12	0.161738	0.172207	0.365249	0.410997	0.379875	0.682536	-0.157077	0.289662
UniRef100_Q6PCX9	Trim37	0.391902	0.00648858	0.278895	0.402808	0.229085	0.765927	-0.495691	0.289778
UniRef100_Q8BGD9	Eif4b	0.930633	0.836022	0.826802	0.888159	0.632978	0.566925	0.0312771	0.290275
UniRef100_Q9Z2T6	Krt85	0.39277	0.928485	0.416849	0.291055	0.287176	0.954331	-0.0476268	0.290284
UniRef100_Q9DC61	Pmpca	0.0864349	0.741351	0.199818	0.829906	0.627011	0.677486	0.12408	0.290433
UniRef100_Q02257	Jup	0.935198	0.308104	0.342568	0.970477	0.114459	0.801533	0.0771562	0.29047
UniRef100_P18828	Sdc1	0.374398	0.838009	0.808274	0.812137	0.0147275	0.0444133	0.118175	0.290541
UniRef100_Q62425	Ndufa4	0.452594	0.219577	0.257859	0.957307	0.867114	0.308012	0.0737666	0.290908
UniRef100_Q60756	Tcf15	0.825885	0.432512	0.559545	0.258386	0.0150019	0.0315354	-0.0950158	0.291212
UniRef100_O08848	Trove2	0.341453	0.647554	0.10175	0.734345	0.339626	0.564712	0.200448	0.291342
UniRef100_Q03146	Ddr1	0.519904	0.958268	0.449268	0.691126	0.661872	0.501985	0.0469764	0.291773
UniRef100_P48302	Ednrb	0.381246	0.634191	0.0149015	0.505152	0.0186563	0.964589	0.321845	0.291975
UniRef100_O70145	Ncf2	0.585567	0.769171	0.114334	0.722137	0.90569	0.235829	-0.0453033	0.292009
UniRef100_O88335	Kcnj1	0.574336	0.747385	0.872462	0.553563	0.910876	0.360231	0.0401853	0.292462
UniRef100_Q3U4N2	Icmt	0.770392	0.450423	0.47905	0.997859	0.453453	0.768622	0.0288486	0.292677
UniRef100_P70423	Slc7a3	0.438467	0.187409	0.131101	0.455074	0.000468513	0.745145	-0.155045	0.293186
UniRef100_Q3TF02	Etf1	0.851202	0.0853675	0.286621	0.824651	0.0381453	0.296013	-0.166323	0.293253
UniRef100_P56376	Acyp1	0.852878	0.429552	0.871259	0.732831	0.277818	0.809373	0.0345732	0.294226
UniRef100_Q9DCE9	Igtp	0.00100851	0.0600046	0.0232765	0.0861532	0.152395	0.0311557	-0.564937	0.294525
UniRef100_Q91W43	Gldc	0.370573	0.122817	0.289686	0.553472	0.2776	0.642945	-0.0839504	0.294859
UniRef100_Q6ZPF3	Tiam2	0.518973	0.207658	0.226736	0.648574	0.000928028	0.957986	0.14453	0.29505
UniRef100_Q8VDH1	Fbxo21	0.943462	0.375387	0.798132	0.484006	0.0626101	0.927228	-0.0602664	0.295296
UniRef100_P17918	Pcna	0.83428	0.347543	0.869596	0.837999	0.980818	0.324479	-0.0432989	0.295444
UniRef100_Q3UWA6	Gucy2c	0.86609	0.828712	0.117238	0.571826	0.983954	0.197049	0.0792936	0.29583
UniRef100_P55072	Vcp	0.663015	0.106302	0.466032	0.947587	0.913744	0.144576	-0.094831	0.295888
UniRef100_Q3U0P5	Entpd6	0.977829	0.591741	0.73219	0.722565	0.817297	0.0970471	0.067735	0.295955
UniRef100_P54846	Nrl	0.0463134	0.505197	0.0265533	0.602901	0.0133343	0.362182	0.385453	0.29601
UniRef100_E9Q7K1	Guk1	0.471997	0.948956	0.420637	0.446189	0.0136086	0.749565	-0.0946529	0.29606
UniRef100_Q8C7E9	Cstf2t	0.752242	0.55755	0.768545	0.964653	0.311083	0.71855	0.0333455	0.296106
UniRef100_P06684	Hc	0.837812	0.628242	0.663885	0.782606	0.359739	0.746026	-0.0334198	0.296327
UniRef100_P15116	Cdh2	0.166009	0.162909	0.45141	0.327803	0.541623	0.856882	0.226425	0.296896
UniRef100_P48758	Cbr1	0.437688	0.676517	0.0549162	0.602838	0.0642065	0.442776	0.161353	0.297256
UniRef100_P97378	Il12rb2	0.494002	0.918586	0.274468	0.256649	0.0263168	0.032813	0.15781	0.297261
UniRef100_E9Q589	Ncam1	0.369659	0.0791895	0.359242	0.25482	0.990385	0.568459	-0.22874	0.297349
UniRef100_P35582	Foxa1	0.602424	0.84125	0.0904125	0.916273	0.670733	0.912587	-0.0620653	0.29774
UniRef100_Q9D312	Krt20	0.686708	0.340928	0.565225	0.915834	0.0904377	0.62884	0.0767209	0.297822
UniRef100_P56375	Acyp2	0.0894312	0.568533	0.640204	0.948492	0.94137	0.655151	0.0435344	0.297952
UniRef100_P70208	Plxna3	0.913432	0.51777	0.478752	0.629375	0.0187854	0.992685	-0.0774688	0.298158
UniRef100_Q9Z222	B3gnt2	0.550512	0.0186244	0.101392	0.877741	0.0682509	0.914865	-0.598838	0.298412
UniRef100_O70273	Ehf	0.411793	0.694718	0.780594	0.392582	0.217507	0.767632	0.0583072	0.298854
UniRef100_P23591	Tsta3	0.341884	0.286698	0.168209	0.809384	0.381018	0.0222043	-0.124474	0.299296
UniRef100_P60510	Ppp4c	0.571999	0.239161	0.515588	0.280463	0.965582	0.235849	-0.0517733	0.299416
UniRef100_P12242	Ucp1	0.355875	0.0901837	0.540108	0.565609	0.117698	0.110579	0.216262	0.299459
UniRef100_P41163	Etv2	0.00456124	0.733068	0.848695	0.563623	0.0847364	0.71226	-0.287559	0.299972
UniRef100_Q62053	Ptger2	0.90763	0.716986	0.873971	0.221448	0.756787	0.359625	0.0344889	0.300026
UniRef100_Q7TSH2	Phkb	0.95985	0.841434	0.832934	0.775279	0.18794	0.95294	0.0472644	0.300067
UniRef100_Q9WVS4	Stk30	0.431342	0.505896	0.0377481	0.418041	0.877027	0.748757	0.225068	0.300418
UniRef100_Q03366	Ccl7	0.684947	0.724324	0.948945	0.850861	0.807789	0.161546	-0.100039	0.301252
UniRef100_P47810	Wee1	0.992371	0.801949	0.927063	0.673978	0.000907933	0.407762	0.113235	0.301424
UniRef100_Q8CFZ5	Slc22a12	0.126036	0.113391	0.542053	0.0975466	0.263243	0.4656	-0.349225	0.301444
UniRef100_Q6P5G5	Hccs	0.652615	0.257028	0.41268	0.781	0.100516	0.675959	0.0823058	0.302204
UniRef100_O08788	Dctn1	0.813245	0.222711	0.587799	0.571406	0.072769	0.967231	0.0726267	0.302309
UniRef100_Q99J83	Atg5	0.932136	0.976233	0.992742	0.475893	0.380763	0.767993	0.04919	0.302624
UniRef100_P58742	Aaas	0.249283	0.360842	0.640113	0.996203	0.0711034	0.892332	-0.0686812	0.302968
UniRef100_P24622	Cryaa	0.708474	0.957617	0.549083	0.273306	0.0885724	0.531062	-0.0599755	0.30315
UniRef100_Q61285	Abcd2	0.124424	0.286928	0.228921	0.243446	0.979061	0.428325	-0.215142	0.303482
UniRef100_E9Q7V6	Pde1c	0.814731	0.838059	0.369663	0.473203	0.368844	0.695608	0.0256052	0.303567
UniRef100_B1AUB7	Nfia	0.863923	0.114907	0.255354	0.905009	0.0112991	0.903797	0.09467	0.303696
UniRef100_Q9JIS8	Slc12a4	0.512021	0.883061	0.485942	0.465464	0.391327	0.673738	0.0342146	0.303822
UniRef100_P32442	Meox1	0.178261	0.55651	0.863268	0.617252	0.750825	0.292418	0.0627567	0.30408
UniRef100_Q8R527	Rhoq	0.925496	0.16465	0.0511686	0.613974	0.0417225	0.28351	-0.17988	0.304163
UniRef100_Q8CI94	Pygb	0.911493	0.239792	0.508699	0.416717	0.204208	0.0209275	-0.144901	0.304171
UniRef100_Q3UVR1	Madcam1	0.58017	0.0198222	0.344889	0.226751	0.275314	0.937016	0.343799	0.304494
UniRef100_O88430	Ccl22	0.757422	0.0106002	0.776499	0.576956	0.270531	0.594889	-0.475505	0.305133
UniRef100_O35261	E2f3	0.0765937	0.437099	0.0972874	0.21086	0.00216752	0.680743	0.205832	0.305737
UniRef100_Q860W7	H2-M10.1	0.531616	0.233715	0.956797	0.970902	0.0805887	0.353002	-0.129993	0.306193
UniRef100_Q91YR9	Ptgr1	0.673843	0.451923	0.012937	0.827552	0.0251713	0.282213	0.325796	0.306316
UniRef100_Q8K1M3	Prkar2a	0.54707	0.0207641	0.368697	0.919534	0.0690638	0.538458	0.367202	0.306857
UniRef100_Q3TTX5	Svil	0.411172	0.336098	0.695613	0.957543	0.031648	0.07188	0.0906137	0.306934
UniRef100_Q9CZL5	Pcbd2	0.714665	0.746571	0.65729	0.816869	0.89481	0.010941	0.116671	0.306949
UniRef100_O08797	Serpinb9	0.550067	0.799265	0.104941	0.0381782	0.497442	0.452673	-0.259105	0.307697
UniRef100_O88456	Capns1	0.135176	0.559476	0.10362	0.370911	0.0228941	0.040869	-0.170517	0.308133
UniRef100_Q64287	Irf4	0.0330626	0.668261	0.073889	0.00750339	0.00185106	0.111307	-0.565694	0.308468
UniRef100_P51436	Drd4	0.364722	0.0324004	0.988887	0.361037	0.373367	0.700845	-0.307809	0.30872
UniRef100_Q9JIW4	Polm	0.254364	0.302114	0.921061	0.727247	0.89025	0.0466458	0.0795952	0.30911
UniRef100_O09046	Il4i1	0.570679	0.417875	0.0884692	0.927533	0.331264	0.176883	-0.197594	0.309124
UniRef100_P47806	Gli1	0.100191	0.934198	0.804527	0.286796	0.915172	0.661395	0.0331572	0.31037
UniRef100_Q3TYJ1	Slc18a3	0.991537	0.266151	0.459285	0.605141	0.644662	0.895068	-0.0453031	0.310537
UniRef100_Q6NSQ7	Ltv1	0.743841	0.365879	0.310652	0.285663	0.0946158	0.982995	-0.138916	0.31054
UniRef100_P27786	Cyp17a1	0.902532	0.853458	0.464995	0.92069	0.14779	0.79087	-0.0584629	0.31062
UniRef100_Q64669	Nqo1	0.590693	0.0776098	0.616974	0.859657	0.254954	0.26577	0.158412	0.311045
UniRef100_Q91YD3	Dcp1a	0.865149	0.731795	0.992248	0.61722	0.079227	0.605394	0.0811608	0.311079
UniRef100_P70191	Traf5	0.581587	0.573319	0.132594	0.488494	0.375059	0.355781	-0.11202	0.31109
UniRef100_Q9EQQ0	Suv39h2	0.277793	0.332318	0.299314	0.919121	0.206091	0.700024	-0.0526314	0.311574
UniRef100_P35279	Rab6	0.822543	0.524829	0.185635	0.537498	0.428664	0.719521	0.0376455	0.311676
UniRef100_P70340	Smad1	0.688127	0.655767	0.208629	0.758573	0.206219	0.585	0.0533241	0.312089
UniRef100_P28359	Hoxd10	0.121082	0.210867	0.0716655	0.377462	0.450228	0.366207	-0.268911	0.31212
UniRef100_Q3ZB57	Gab2	0.942324	0.102199	0.16997	0.661351	0.797259	0.255598	0.143686	0.312338
UniRef100_Q07832	Plk1	0.029038	0.827717	0.123507	0.324154	0.122949	0.00081611	-0.329261	0.312502
UniRef100_Q8BJU9	Mtrf1l	0.0888855	0.51168	0.274022	0.206147	0.604259	0.0898208	0.270961	0.312783
UniRef100_P0C0A3	Chmp6	0.698961	0.828999	0.870365	0.915895	0.747706	0.00411404	0.128425	0.313314
UniRef100_P63013	Prrx1	0.75224	0.687045	0.329479	0.397893	0.0348733	0.697373	-0.0867918	0.313383
UniRef100_P61221	Abce1	0.654017	0.976136	0.0708379	0.574121	0.836381	0.743979	-0.137756	0.313731
UniRef100_Q8BHJ5	Tbl1xr1	0.368565	0.543122	0.0574395	0.694138	0.695772	0.605429	-0.112256	0.313918
UniRef100_Q9CQY9	Ndufc1	0.212231	0.850036	0.430514	0.933218	0.323783	0.943306	0.0432873	0.314189
UniRef100_Q8C1A5	Thop1	0.339247	0.0368413	0.834444	0.980605	0.120939	0.473187	-0.23511	0.314345
UniRef100_Q9CZX7	Tmem55a	0.680841	0.744779	0.245188	0.871181	0.537951	0.123998	-0.0784461	0.314558
UniRef100_Q9CZY3	Ube2v1	0.976587	0.0182012	0.572639	0.336526	0.611104	0.104536	-0.357844	0.314957
UniRef100_P43274	Hist1h1e	0.649074	0.284764	0.654895	0.311811	0.950924	0.0516828	-0.0570379	0.31497
UniRef100_Q922H2	Pdk3	0.885527	0.570383	0.845037	0.829033	0.669617	0.000249131	-0.163184	0.315397
UniRef100_P23927	Cryab	0.910375	0.00627607	0.314147	0.816201	0.0576734	0.375148	-0.590588	0.315465
UniRef100_P51791	Clcn3	0.41778	0.861384	0.255288	0.690804	0.00599243	0.370208	0.0833617	0.316271
UniRef100_O09101	Pigf	0.959481	0.976877	0.586601	0.684341	0.759334	0.674638	0.0437406	0.316317
UniRef100_P48030	Tgfa	0.487399	0.582818	0.899232	0.991351	0.871031	0.108339	-0.0559276	0.316318
UniRef100_Q8K3W0	Bre	0.762785	0.0827923	0.419037	0.647583	0.0160677	0.635887	0.103027	0.316377
UniRef100_Q9R1S8	Capn7	0.691036	0.620583	0.0220187	0.931346	0.265046	0.639639	-0.251451	0.317206
UniRef100_Q5NCC3	Trim41	0.537794	0.625291	0.841433	0.714155	0.287228	0.938945	-0.039788	0.317667
UniRef100_P02830	Hoxa7	0.708018	0.992381	0.27078	0.88033	0.969186	0.26808	-0.0769773	0.31767
UniRef100_O54927	Wsb1	0.647637	0.119136	0.326656	0.922031	0.535058	0.605795	-0.0520778	0.318507
UniRef100_Q02013	Aqp1	0.383039	0.692191	0.0499489	0.720219	0.581404	0.0624517	0.298704	0.319303
UniRef100_Q3UV11	Krt6b	0.0840033	0.0892254	0.915069	0.461766	0.450814	0.621109	0.276649	0.319724
UniRef100_P42082	Cd86	0.248987	0.134257	0.692707	0.191771	0.745088	0.117478	-0.205589	0.319763
UniRef100_Q9D6J6	Ndufv2	0.607242	0.930412	0.141159	0.796401	0.211872	0.939591	0.0555975	0.32033
UniRef100_Q5XJZ3	Grwd1	0.372842	0.445187	0.98056	0.858298	0.68253	0.0626198	-0.0849042	0.320761
UniRef100_Q9JJI8	Rpl38	0.490163	0.330568	0.361174	0.761978	0.892601	0.0161987	-0.114612	0.320911
UniRef100_P47199	Cryz	0.920123	0.0913984	0.474919	0.82413	0.761205	0.015167	0.124018	0.320921
UniRef100_Q91Y82	Klk6	0.109817	0.506755	0.629316	0.657249	0.609363	0.459167	0.0264638	0.321085
UniRef100_P14142	Slc2a4	0.128142	0.0978339	0.08664	0.0493016	0.175357	0.201106	0.325574	0.321248
UniRef100_P39429	Traf2	0.50543	0.667885	0.450095	0.428317	0.776645	0.0727509	-0.0697342	0.321342
UniRef100_Q9CPV5	Pmf1	0.534015	0.69453	0.0227523	0.552288	0.914886	0.78384	-0.275404	0.321581
UniRef100_Q9DBJ1	Pgam1	0.435638	0.540685	0.896811	0.910707	0.830896	0.303357	0.0490167	0.321623
UniRef100_Q8VE37	Rcc1	0.923455	0.00575124	0.862049	0.825445	0.345274	0.941557	0.446248	0.322031
UniRef100_Q61473	Sox17	0.940645	0.0293696	0.466962	0.209852	0.854038	0.653717	-0.36342	0.322038
UniRef100_Q9Z2X8	Keap1	0.00510937	0.971914	0.833795	0.746076	0.25511	0.439611	0.240347	0.322051
UniRef100_A3KN68	Ptprn2	0.540792	0.572722	0.713444	0.914244	0.266655	0.659005	-0.0317918	0.322831
UniRef100_D3Z4R4	Nkx6-2	0.936321	0.418686	0.676663	0.171032	0.487179	0.0388249	0.127897	0.322903
UniRef100_Q9Z1P5	Cd320	0.896644	0.0189475	0.347075	0.619681	0.389942	0.638887	-0.449983	0.322954
UniRef100_Q8R0I1	Pemt	0.707957	0.108521	0.593165	0.089068	0.0552444	0.487254	0.214897	0.32303
UniRef100_P97297	Adm	0.467885	0.388916	0.00018049	0.882541	0.766759	0.784395	-0.418376	0.32317
UniRef100_P56477	Irf5	0.265032	0.17461	0.743584	0.663174	0.871259	0.385393	-0.0344118	0.323274
UniRef100_P55099	Tac2	0.88705	0.996215	0.0302741	0.813597	0.938978	0.311055	0.175345	0.323323
UniRef100_O35652	Lhx8	0.252803	0.736463	0.149178	0.0174895	0.151523	0.352579	0.496981	0.323437
UniRef100_Q61066	Nr0b1	0.451444	0.248735	0.101115	0.672298	0.434231	0.58045	0.221413	0.323448
UniRef100_P42128	Foxk1	0.411177	0.733841	0.934254	0.384246	0.198946	0.682883	0.0779554	0.323496
UniRef100_Q8R1Q9	Rbks	0.54385	0.385294	0.0749688	0.0904218	0.146466	0.216535	0.229183	0.323568
UniRef100_Q8VIF5	Ntsr2	0.154897	0.767674	0.000457181	0.334551	0.598725	0.09187	0.34603	0.323601
UniRef100_P19246	Nefh	0.832329	0.0521872	0.445746	0.547995	0.934403	0.654013	0.0291982	0.323642
UniRef100_Q14C12	Arl10	0.127655	0.82383	0.612735	0.947804	0.585713	0.685742	0.0382855	0.323848
UniRef100_P13609	Srgn	0.717937	0.269445	0.114548	0.0598446	0.323275	0.488748	-0.225655	0.32431
UniRef100_Q6ZQM8	Ugt1a7c	0.914387	0.467855	0.214045	0.868581	0.602108	0.369171	0.0818323	0.324318
UniRef100_P49766	Vegfb	0.449069	0.465377	0.898074	0.777751	0.606574	0.828821	0.0475147	0.324436
UniRef100_Q80ZX9	Olfr70	0.475083	0.559932	0.222844	0.141817	0.234069	0.697059	0.114611	0.324735
UniRef100_B7ZW87	Cd27	0.969632	0.0281741	0.987595	0.922207	0.189329	0.903892	-0.394595	0.325352
UniRef100_Q5SSW2	Psme4	0.627757	0.633876	0.0995938	0.873944	0.298737	0.0614794	-0.11121	0.325699
UniRef100_P48318	Gad1	0.302509	0.339265	0.877762	0.466357	0.0111095	0.553326	-0.101418	0.326573
UniRef100_P10922	H1f0	0.531897	0.196666	0.402689	0.589919	0.911808	0.000300225	-0.181143	0.327077
UniRef100_O35607	Bmpr2	0.510305	0.922918	0.191177	0.872545	0.151527	0.473282	0.0795503	0.327837
UniRef100_P18894	Dao	0.39755	0.0701277	0.878933	0.88356	0.404387	0.772441	0.153674	0.32787
UniRef100_Q921Y1	Dhx16	0.801676	0.399465	0.997195	0.56751	0.584328	0.671711	-0.0402218	0.328412
UniRef100_O54957	Lat	0.495275	0.944752	0.753257	0.0375138	0.184059	0.486008	-0.20644	0.32842
UniRef100_O70410	Vmn2r1	0.795095	0.0859947	0.551867	0.681349	0.541558	0.713341	0.236089	0.328503
UniRef100_O35054	Cldn4	0.317438	0.107413	0.0514024	0.418478	0.0672458	0.185061	-0.272672	0.329053
UniRef100_Q9R0X2	Adamdec1	0.307417	0.988737	0.0538997	0.270514	0.198244	0.414491	-0.203772	0.329161
UniRef100_E9QLN8	Rnaseh1	0.20082	0.564548	0.839514	0.803549	0.514361	0.0885558	0.081425	0.329438
UniRef100_Q9JI58	Raet1d	0.711956	0.131259	0.948619	0.201479	0.167781	0.399332	-0.110371	0.329561
UniRef100_P63072	Ubd	0.0703538	0.0776168	0.13652	0.349143	0.224674	0.154996	-0.370338	0.329608
UniRef100_P13346	Fosb	0.298687	0.435268	0.390777	0.241031	0.00461714	0.607461	0.157919	0.33041
UniRef100_Q3UQ44	Iqgap2	0.817847	0.5139	0.0244316	0.669676	0.0813203	0.0358888	0.181534	0.331526
UniRef100_P29621	Serpina3c	0.219452	0.0184371	0.055295	0.0600245	0.266937	0.73159	-0.613055	0.332934
UniRef100_P08101	Fcgr2b	0.328735	0.484489	0.0282141	0.430791	0.502312	0.043845	-0.329136	0.33295
UniRef100_Q61532	Mapk6	0.367332	0.0277069	0.39489	0.652696	0.0618925	0.641165	0.354948	0.333155
UniRef100_P16043	Ghrh	0.740278	0.517282	0.607474	0.787456	0.683104	0.620487	-0.0306193	0.333897
UniRef100_Q91X50	Gstt1	0.369397	0.343613	0.314314	0.183675	0.00034829	0.195216	-0.171631	0.334005
UniRef100_Q8CGK3	Lonp1	0.977938	0.532406	0.177424	0.726985	0.136927	0.0509494	-0.0772509	0.334106
UniRef100_P24472	Gsta4	0.518212	0.004925	0.04459	0.630633	0.00166435	0.00827455	0.549509	0.334169
UniRef100_E9QK20	Cacna1e	0.0142659	0.333402	0.687983	0.73619	0.00383652	0.380688	-0.265804	0.334777
UniRef100_O35632	Hyal2	0.426495	0.680538	0.348759	0.886058	0.899134	0.0900681	-0.100737	0.334967
UniRef100_B5B2N2	Nfatc1	0.250558	0.416846	0.0899965	0.388294	0.847774	0.496507	-0.171565	0.335713
UniRef100_Q8C2Q3	Rbm14	0.280025	0.91686	0.390531	0.454615	0.497713	0.583226	-0.0339792	0.335807
UniRef100_Q9JJ66	Cdc20	0.751723	0.560182	0.814923	0.2718	0.0091288	0.00138309	-0.194532	0.336222
UniRef100_P48031	Gbx2	0.591806	0.583566	0.885068	0.700556	0.0576025	0.597632	-0.0816243	0.336279
UniRef100_G5E870	Trip12	0.541517	0.673789	0.0667615	0.776615	0.837043	0.145832	-0.129634	0.336325
UniRef100_P22727	Wnt6	0.257502	0.936907	0.056782	0.599271	0.276693	0.145621	0.151493	0.336403
UniRef100_P70661	Neurog3	0.909077	0.0104238	0.999549	0.663645	0.348476	0.0622461	0.44943	0.336548
UniRef100_P62812	Gabra1	0.13866	0.0120821	0.699691	0.432289	0.92586	0.410726	0.437232	0.336806
UniRef100_Q60864	Stip1	0.590046	0.757277	0.595436	0.692307	0.588284	0.0231244	-0.120456	0.336807
UniRef100_Q8BH69	Sephs1	0.224708	0.0295934	0.91284	0.210483	0.846154	0.898714	-0.333109	0.336893
UniRef100_Q8BRG6	Klhl24	0.405109	0.238137	0.202673	0.852872	0.0153633	0.039	-0.171275	0.337517
UniRef100_Q3UG90	Pxn	0.675905	0.0713782	0.309107	0.98073	0.30051	0.558562	0.0597529	0.337692
UniRef100_P13542	Myh8	0.116417	0.820228	0.152523	0.322763	0.0695145	0.589298	-0.234942	0.337946
UniRef100_Q62074	Prkci	0.710849	0.768379	0.184194	0.832864	0.57776	0.562302	0.0286342	0.338445
UniRef100_E9Q7H6	Tars2	0.998872	0.857672	0.488149	0.864091	0.193606	0.862446	-0.0465109	0.338532
UniRef100_Q80VR3	Sult1c1	0.286824	0.60914	0.983099	0.748959	0.49771	0.900786	-0.0362675	0.338728
UniRef100_Q8R0J7	Vps37b	0.561336	0.902249	0.414545	0.408967	0.890894	0.641704	-0.0600785	0.339248
UniRef100_P22339	Gadd45b	0.487572	0.991296	0.451453	0.545982	0.593457	0.765844	-0.0530415	0.340064
UniRef100_P09803	Cdh1	0.907875	0.478014	0.690054	0.919487	0.12609	0.921263	0.0483827	0.340329
UniRef100_P97496	Smarcc1	0.860648	0.795818	0.00318192	0.769677	0.717247	0.951262	0.207415	0.340628
UniRef100_D3YYC3	Setdb1	0.299021	0.0678748	0.847409	0.940621	0.578179	0.190524	0.130475	0.340695
UniRef100_P23359	Bmp7	0.993512	0.497426	0.462095	0.914502	0.0788602	0.814066	0.0660057	0.341048
UniRef100_Q02152	Htr2b	0.129669	0.381296	0.0167902	0.959548	0.320773	0.498848	0.24285	0.34115
UniRef100_Q99J36	Thumpd1	0.926767	0.903778	0.590101	0.16159	0.357998	0.963484	0.0485779	0.341262
UniRef100_P48379	Rfx2	0.334839	0.835157	0.0255948	0.910949	0.652095	0.00165319	0.166577	0.341369
UniRef100_P08152	Egr2	0.541204	0.581149	0.732315	0.811315	0.264222	0.865826	-0.0395695	0.342017
UniRef100_Q8VE80	Thoc3	0.576053	0.957282	0.557017	0.293969	0.373895	0.566924	0.0343268	0.342686
UniRef100_O08665	Sema3a	0.47456	0.915661	0.38171	0.0342034	0.925509	0.903392	-0.240534	0.342707
UniRef100_Q8R2Y2	Mcam	0.149017	0.127568	0.607094	0.0503274	0.116885	0.735833	-0.365675	0.342724
UniRef100_Q3UYV9	Ncbp1	0.502282	0.973615	0.17084	0.893425	0.14931	0.712055	0.0732711	0.342883
UniRef100_P23242	Gja1	0.764002	0.817741	0.784551	0.665097	0.489207	0.0109681	0.190349	0.342954
UniRef100_Q76MZ3	Ppp2r1a	0.668409	0.661213	0.668434	0.990776	0.0182768	0.573438	-0.0707617	0.342967
UniRef100_O88174	Cd46	0.349737	0.943841	0.0811873	0.390299	0.131425	0.892385	0.16413	0.342982
UniRef100_P27782	Lef1	0.317004	0.0476303	0.668947	0.980572	0.00585168	0.820649	-0.275091	0.343621
UniRef100_Q91WA1	Tipin	0.824008	0.323779	0.00354736	0.637552	0.00261305	0.596412	-0.343577	0.343941
UniRef100_Q9CQT5	Pomp	0.205917	0.363418	0.228398	0.801585	0.595901	0.557396	0.0374764	0.344205
UniRef100_P32037	Slc2a3	0.203986	0.369544	0.129536	0.56485	0.890017	0.00763385	0.242989	0.344451
UniRef100_P10166	Mycl1	0.87171	0.628537	0.155198	0.425871	0.602846	0.824825	0.0793561	0.344607
UniRef100_Q9Z2F6	Bcl3	0.566198	0.753833	0.127091	0.784591	0.153336	0.0818829	-0.177493	0.344617
UniRef100_Q03145	Epha2	0.052627	0.0520459	0.0485205	0.740352	0.0591831	0.427628	0.434021	0.344699
UniRef100_P13366	Gzmg	0.607177	0.731628	0.597285	0.0998736	0.3358	0.895871	0.0447128	0.345172
UniRef100_P08752	Gnai2	0.774609	0.969112	0.646649	0.913958	0.38214	0.708695	0.0406755	0.345316
UniRef100_P41164	Etv1	0.543016	0.0122469	0.922778	0.478866	0.0484045	0.200151	-0.426192	0.346336
UniRef100_P63154	Crnkl1	0.913824	0.758709	0.0247499	0.543404	0.444486	0.830866	-0.141282	0.346466
UniRef100_Q8K2K6	Agfg1	0.469298	0.0509075	0.852419	0.390981	0.393423	0.0425934	0.231052	0.346469
UniRef100_P48024	Eif1	0.865732	0.546521	0.0270171	0.817657	0.454307	0.300216	0.112876	0.347004
UniRef100_P28650	Adssl1	0.992965	0.0292499	0.758261	0.757163	0.480902	0.0188449	-0.440931	0.347187
UniRef100_E9PYI8	Usp14	0.247262	0.309303	0.989864	0.990806	0.10223	0.435328	0.0935649	0.347188
UniRef100_P10284	Hoxb4	0.063748	0.122835	0.225498	0.686177	0.948072	0.244522	-0.204085	0.347456
UniRef100_Q3US51	Cdkn2d	0.668248	0.108282	0.278422	0.816391	0.947931	0.686087	-0.0270962	0.347992
UniRef100_Q8BFR5	Tufm	0.668923	0.687991	0.666939	0.266136	0.797051	0.918762	-0.0419127	0.348072
UniRef100_B1AQL1	Birc5	0.926808	0.240049	0.321915	0.841738	0.549303	0.000622163	-0.224943	0.34831
UniRef100_P60041	Sst	0.586889	0.221095	0.0848955	0.41105	0.113514	0.813676	0.216647	0.348838
UniRef100_P26011	Itgb7	0.0992549	0.512145	0.283497	0.176513	0.607168	0.0292547	-0.173115	0.349193
UniRef100_O70251	Eef1b2	0.435771	0.398063	0.187497	0.755482	0.0581517	0.0243715	0.126811	0.349294
UniRef100_E9PZD8	Cp	0.409258	0.220114	0.00445899	0.203725	0.995929	0.933165	-0.274402	0.350343
UniRef100_Q9ERT9	Ppp1r1a	0.0393178	0.641265	0.823368	0.608767	0.704444	0.954656	0.220646	0.350577
UniRef100_Q9ER00	Stx12	0.495773	0.271724	0.621537	0.662699	0.151191	0.902593	0.0638312	0.35067
UniRef100_Q6PB93	Galnt2	0.700581	0.463931	0.554546	0.330254	0.791361	0.44384	-0.0378747	0.351025
UniRef100_Q61625	Grid2	0.78721	0.776258	0.422399	0.958874	0.781248	0.414413	0.0233554	0.35104
UniRef100_Q6P3D7	Spic	0.858393	0.0969904	0.718595	0.273043	0.702334	0.455744	-0.0350742	0.351208
UniRef100_P70255	Nfic	0.557959	0.28722	0.897943	0.422658	0.161455	0.607331	0.06224	0.351221
UniRef100_Q3V1B5	Mef2c	0.0579391	0.893807	0.0197439	0.0123171	0.310458	0.21626	-0.456795	0.351895
UniRef100_Q8VID5	Recql5	0.959211	0.842913	0.916571	0.719598	0.989516	0.278176	0.0531872	0.352422
UniRef100_Q6P1B1	Xpnpep1	0.838352	0.712467	0.431501	0.877169	0.317948	0.991274	0.0408149	0.352718
UniRef100_Q91WN1	Dnajc9	0.554064	0.932945	0.199037	0.524496	0.733059	0.167205	-0.0446655	0.352977
UniRef100_Q31099	H2-DMb2	0.150974	0.879648	0.011731	0.155165	0.0846381	0.01134	-0.248882	0.353162
UniRef100_Q8BSN6	Vamp4	0.21569	0.735427	0.384614	0.922779	0.0186804	0.808435	0.0967778	0.354312
UniRef100_Q3TG35	Rad21	0.533753	0.544982	0.564094	0.818201	0.476718	0.830343	-0.0358072	0.354335
UniRef100_P48298	Ccl11	0.155921	0.0676731	0.294337	0.275543	0.0996095	0.544712	0.290958	0.354663
UniRef100_P21784	Rag2	0.585117	0.515311	0.952195	0.10044	0.257431	0.371146	0.191436	0.35484
UniRef100_P68032	Actc1	0.622922	0.0571372	0.861024	0.52965	0.930738	0.661276	-0.231814	0.35521
UniRef100_P17433	Sfpi1	0.231061	0.960934	0.486685	0.716194	0.922526	0.255852	0.0507757	0.355418
UniRef100_Q61327	Slc6a3	0.337857	0.220025	0.713647	0.350547	0.382281	0.776932	-0.0331068	0.355628
UniRef100_Q3U6Y0	Stk25	0.231571	0.951812	0.329011	0.484932	0.259529	0.0365595	0.109328	0.355878
UniRef100_Q9R1Q9	Atp6ap1	0.595433	0.920491	0.507514	0.333875	0.379986	0.687187	0.0384037	0.356875
UniRef100_P06332	Cd4	0.804553	0.911374	0.645101	0.798426	0.00529513	0.83387	-0.107078	0.357354
UniRef100_Q9CWS4	Cpsf3l	0.530231	0.834756	0.0269325	0.779675	0.415492	0.868417	0.190185	0.358175
UniRef100_P10078	Zfp28	0.384003	0.00222068	0.985485	0.621692	0.172664	0.939815	-0.572831	0.358212
UniRef100_Q9D0K2	Oxct1	0.410347	0.757981	0.091425	0.508334	0.00664571	0.033435	0.183169	0.35825
UniRef100_Q9WTK3	Gpaa1	0.943948	0.97099	0.705956	0.621391	0.912747	0.377386	0.0524811	0.359105
UniRef100_A0JNY3	Gphn	0.780052	0.752979	0.34589	0.591318	0.0603676	0.719999	0.0700224	0.359109
UniRef100_Q8R359	Ino80e	0.522976	0.0418635	0.711781	0.375304	0.682155	0.296989	0.202806	0.359114
UniRef100_O54788	Dffb	0.417451	0.174025	0.457321	0.454232	0.284665	0.641556	-0.102202	0.359602
UniRef100_P33610	Prim2	0.510599	0.802559	0.844106	0.402432	0.399805	0.0455816	-0.0983104	0.359786
UniRef100_Q9R190	Mta2	0.408777	0.204096	0.655598	0.726226	0.124437	0.325658	-0.0886979	0.359881
UniRef100_P28481	Col2a1	0.514614	0.614194	0.268397	0.586732	0.245073	0.372058	-0.081284	0.360005
UniRef100_B7ZN67	Klrb1a	0.574651	0.332999	0.767851	0.909925	0.409885	0.98505	-0.0350158	0.360388
UniRef100_P48771	Cox7a2	0.721892	0.333111	0.8458	0.792109	0.800865	0.629557	-0.0407109	0.361482
UniRef100_P22724	Wnt4	0.873585	0.744216	0.513321	0.985958	0.217446	0.75918	-0.0569823	0.36228
UniRef100_P57774	Npy	0.229527	0.488439	0.295158	0.158542	0.156267	0.604891	-0.129416	0.362598
UniRef100_P02340	Trp53	0.983207	0.00125872	0.361596	0.231524	0.558387	0.144246	-0.671993	0.362687
UniRef100_Q9Z0U9	S1pr3	0.360908	0.809389	0.310035	0.0378565	0.690805	0.35181	-0.156842	0.363084
UniRef100_P35295	Rab20	0.468179	0.211354	0.174993	0.758707	0.558372	0.792455	-0.0906772	0.363124
UniRef100_Q9QYJ0	Dnaja2	0.818132	0.808385	0.973496	0.999979	0.220355	0.858816	0.0399367	0.363414
UniRef100_Q9CZ30	Ola1	0.455232	0.783571	0.218717	0.316727	0.199056	0.808028	0.0621923	0.363438
UniRef100_Q9WUB3	Pygm	0.380118	0.304735	0.986967	0.110415	0.65674	0.374139	-0.107851	0.364059
UniRef100_Q64314	Cd34	0.173679	0.104394	0.162805	0.400711	0.838501	0.45281	-0.176886	0.364624
UniRef100_P62745	Rhob	0.745901	0.760757	0.173093	0.966393	0.685385	0.757687	-0.0914916	0.364959
UniRef100_Q9CY58-3	Serbp1	0.613001	0.98829	0.242564	0.597937	0.571164	0.150283	-0.0723414	0.36523
UniRef100_Q9QW08	Pdc	0.22067	0.596577	0.0695223	0.439611	0.0648746	0.689893	-0.194991	0.365856
UniRef100_Q9EQ61	Pes1	0.635346	0.802336	0.763675	0.562184	0.947365	0.455046	-0.0416505	0.366123
UniRef100_Q9WUU7	Ctsz	0.935023	0.582472	0.0571634	0.0510514	0.000167395	3.84e-05	-0.274744	0.366456
UniRef100_Q9D8B7	Jam3	0.140223	0.64543	0.802154	0.408468	0.0624003	0.817044	0.081815	0.36746
UniRef100_P41438	Slc19a1	0.371899	0.25086	0.372988	0.573517	0.845735	0.0496111	-0.086756	0.367875
UniRef100_P06795	Abcb1b	0.351472	0.0113809	0.269564	0.885513	0.732302	0.919975	-0.641244	0.368087
UniRef100_P70694	Akr1c6	0.934579	0.86133	0.133889	0.246736	0.275798	0.339859	0.100915	0.368145
UniRef100_Q9D6Y9	Gbe1	0.231431	0.236024	0.134878	0.340786	0.0570357	0.59087	0.287843	0.368668
UniRef100_P27467	Wnt3a	0.368908	0.820897	0.71283	0.118214	0.0625834	0.515832	0.131403	0.368671
UniRef100_Q9CPN9	2210010C04Rik	0.309792	0.501902	0.924573	0.957517	0.175889	0.997738	0.175433	0.369302
UniRef100_P11404	Fabp3	0.215061	0.537295	0.175532	0.823538	0.437414	0.853979	0.105469	0.370126
UniRef100_P08883	Gzmf	0.33564	0.0182767	0.38669	0.406869	0.00287201	0.732459	-0.518582	0.370734
UniRef100_Q64267	Xpa	0.949709	0.17936	0.121603	0.666385	0.0428935	0.720395	-0.280231	0.370766
UniRef100_E9QL80	Lpgat1	0.884126	0.905757	0.523284	0.884441	0.740348	0.0341207	-0.0792332	0.370793
UniRef100_Q8BGC0	Htatsf1	0.358761	0.0754256	0.0795092	0.897163	0.307925	0.908652	-0.221533	0.371442
UniRef100_Q99LE6	Abcf2	0.95416	0.0258971	0.756917	0.876756	0.153	0.414328	-0.301973	0.372226
UniRef100_Q9CW03	Smc3	0.784492	0.317556	0.0279246	0.57022	0.763566	0.620772	-0.167591	0.372698
UniRef100_Q9DD06	Rarres2	0.25434	0.0713912	0.869615	0.154279	0.233807	0.614818	0.234829	0.37279
UniRef100_Q3UHC9	Kcnh1	0.539606	0.374435	0.348358	0.627883	0.742245	0.703028	-0.0278882	0.373122
UniRef100_P23578	Acr	0.708289	0.484695	0.884729	0.664881	0.164266	0.954398	-0.0555586	0.373149
UniRef100_Q3UG58	Myo1d	0.724971	0.997744	0.775407	0.464953	0.213477	0.598849	0.0503786	0.373499
UniRef100_P01325	Ins1	0.998019	0.495697	0.360167	0.987121	0.532511	0.791551	0.0446794	0.373698
UniRef100_Q6A068	Cdc5l	0.891388	0.555352	0.909816	0.851793	0.255201	0.999643	0.0396014	0.373777
UniRef100_Q91VJ4	Stk38	0.48862	0.26584	0.662539	0.321117	0.942116	0.689435	0.0271801	0.37402
UniRef100_E9PYH0	Vcan	0.354367	0.54998	0.965505	0.96018	0.652922	0.578962	-0.0259435	0.37431
UniRef100_Q9Z1Z2	Strap	0.894613	0.500907	0.0152752	0.648125	0.00122758	0.846068	-0.187891	0.374404
UniRef100_Q6P1H4	Extl3	0.364665	0.492273	0.594828	0.555	0.49674	0.728958	0.0492168	0.374518
UniRef100_Q3UZT1	Grik1	0.944343	0.224746	0.0982681	0.462932	0.698711	0.976422	0.225835	0.374968
UniRef100_P36898	Bmpr1b	0.528584	0.561454	0.376561	0.0298379	0.0693491	0.613691	-0.18281	0.375001
UniRef100_O70167	Pik3c2g	0.704945	0.00908914	0.237281	0.556962	0.723611	0.840525	0.389203	0.375033
UniRef100_P12960	Cntn1	0.882705	0.2177	0.737269	0.176943	0.527812	0.459052	0.0829401	0.375371
UniRef100_Q99M46	Polr2c	0.504926	0.783907	0.100891	0.897999	0.465416	0.852784	0.0517356	0.375449
UniRef100_P24456	Cyp2d10	0.196901	0.204628	0.374691	0.844136	6.62e-06	8.82e-05	0.460995	0.375808
UniRef100_Q9R0Y1	Accn5	0.791006	0.647629	0.0436876	0.303662	0.674525	0.452296	0.194036	0.376339
UniRef100_Q9JHW2	Nit2	0.765889	0.0961714	0.0470491	0.054645	0.175021	0.186251	0.261801	0.377418
UniRef100_Q7TSJ6	Lats2	0.161204	0.33569	0.869751	0.525018	0.0182446	0.227031	0.0911201	0.377568
UniRef100_O35305	Tnfrsf11a	0.632879	0.463074	0.19037	0.533694	0.227935	0.123402	-0.103465	0.377664
UniRef100_P33267	Cyp2f2	0.833707	0.667725	0.545943	0.92555	0.00508164	0.50038	0.178251	0.377713
UniRef100_P63267	Actg2	0.259034	0.0832395	0.145616	0.959458	0.00420012	0.967611	0.245389	0.377885
UniRef100_P70336	Rock2	0.761079	0.51407	0.0408117	0.972288	0.0628609	0.461349	-0.156193	0.378399
UniRef100_Q8BTV2	Cpsf7	0.586662	0.197061	0.723823	0.694326	0.791572	0.949818	0.0382917	0.378439
UniRef100_P31996	Cd68	0.152083	0.112262	0.0531873	0.757638	0.352363	0.153724	-0.224279	0.37873
UniRef100_P19221	F2	0.227398	0.514842	0.128481	0.674476	0.0142105	0.929379	-0.092532	0.378958
UniRef100_E9PZQ0	Ryr1	0.352729	0.792738	0.225448	0.0376692	0.752207	0.586417	0.247512	0.378988
UniRef100_Q9Z265	Chek2	0.337878	0.89417	0.934235	0.428165	0.882748	0.534859	-0.0308241	0.379372
UniRef100_P63139	Nfyb	0.830059	0.240651	0.221232	0.751057	0.217448	0.304514	-0.0916198	0.379486
UniRef100_Q99N57	Raf1	0.635653	0.254469	0.731609	0.896821	0.893973	0.259504	0.0470666	0.379487
UniRef100_P70701	Wnt10a	0.46991	0.0505978	0.953262	0.475772	0.250838	0.334095	-0.0944103	0.379572
UniRef100_P47968	Rpia	0.965936	0.300709	0.769463	0.558592	0.664471	0.0441453	-0.0728583	0.380031
UniRef100_A2A7A5	Gm13154	0.633062	0.136763	0.287923	0.467497	0.187342	0.886838	0.0441956	0.380076
UniRef100_P43120	Hhex	0.181631	0.175563	0.621493	0.184554	0.838408	0.117152	-0.143212	0.380908
UniRef100_Q91WM0	Zfp617	0.598941	0.604283	0.92117	0.834673	0.0916304	0.909509	0.0907505	0.380976
UniRef100_Q64280	Lefty1	0.687944	0.222411	0.135523	0.934193	0.410092	0.147628	-0.120447	0.381888
UniRef100_Q6P542	Abcf1	0.8474	0.643226	0.843018	0.409479	0.159332	0.049486	0.0819856	0.382315
UniRef100_P20108	Prdx3	0.936412	0.593143	0.632058	0.766158	0.865405	0.453954	0.0454685	0.3824
UniRef100_B2RY56	Rbm25	0.835267	0.454888	0.564773	0.677055	0.650222	0.261199	-0.0608435	0.382709
UniRef100_P41539	Tac1	0.485469	0.261889	0.28818	0.992607	0.499272	0.000493549	0.155649	0.38332
UniRef100_Q9EPW9	Tlr6	0.565243	0.51673	0.594178	0.237404	0.220688	0.0495191	0.093616	0.38334
UniRef100_P18406	Cyr61	0.952775	0.222028	0.449786	0.880246	0.153542	0.0969977	0.0936456	0.383465
UniRef100_P62917	Rpl8	0.806614	0.449042	0.446019	0.43413	0.831864	0.0628045	0.0635625	0.383511
UniRef100_O88904	Hipk1	0.928542	0.484141	0.511236	0.92575	0.493122	0.0676787	-0.0636623	0.383745
UniRef100_A6H6A5	Pgr	0.928894	0.340802	0.381796	0.46753	0.0398209	0.614782	-0.105881	0.383908
UniRef100_Q61474	Msi1	0.289706	0.111584	0.0636868	0.812219	0.157545	0.685691	0.223383	0.384062
UniRef100_P97863	Nfib	0.716552	0.548537	0.919965	0.327676	0.359038	0.634243	0.0539035	0.384079
UniRef100_Q9Z1V0	Olfr49	0.281449	0.0222881	0.535009	0.862605	0.998453	0.992776	0.327877	0.384341
UniRef100_P55772	Entpd1	0.924669	0.947756	0.865716	0.550577	0.129898	0.796268	-0.0674085	0.384566
UniRef100_Q3USU4	Cyp7b1	0.687064	0.105402	0.271275	0.746031	0.205477	0.685651	0.0717431	0.384686
UniRef100_Q61824	Adam12	0.851731	0.871547	0.0146107	0.899883	0.717939	0.469382	-0.0197047	0.384772
UniRef100_O88472	Tnfrsf17	0.212356	0.386464	0.112721	0.841038	0.0356653	0.37651	-0.114935	0.384887
UniRef100_Q8VDL4	Adpgk	0.980633	0.132789	0.199488	0.820951	0.628569	0.559789	0.0473426	0.38489
UniRef100_P50571	Gabrb1	0.913946	0.643084	0.0563966	0.93731	0.158905	0.599012	0.164706	0.385143
UniRef100_Q9JJT0	Rcl1	0.556137	0.464318	0.76337	0.508193	0.134538	0.991416	0.0466209	0.385217
UniRef100_Q61647	Has1	0.113842	0.87211	0.789422	0.41183	0.271582	0.832129	0.099217	0.38531
UniRef100_P10855	Ccl3	0.577364	0.162891	0.156351	0.107503	0.662766	0.00880973	0.164876	0.38531
UniRef100_Q9D842	Aplf	0.704868	0.625882	0.0306748	0.615307	0.273352	0.414346	-0.223242	0.385653
UniRef100_Q8CFV9	Rfk	0.238599	0.765919	0.676346	0.837392	0.0180338	0.236661	0.0824474	0.386062
UniRef100_P30731	Gpr83	0.639855	0.0794397	0.475227	0.892426	0.277179	0.00346285	-0.175586	0.38611
UniRef100_P35487	Pdha2	0.14824	0.538047	0.424115	0.880266	0.843862	0.395371	0.0337125	0.386431
UniRef100_B8JJL8	Pdcd6ip	0.479322	0.721359	0.360239	0.94343	0.239231	0.0146067	0.0768782	0.386439
UniRef100_O35239	Ptpn9	0.334751	0.270659	0.136662	0.953431	0.138689	0.0591423	0.121441	0.386787
UniRef100_O08999	Ltbp2	0.268179	0.796619	0.372051	0.0937528	0.804257	0.316685	0.135752	0.386879
UniRef100_P55284	Cdh5	0.281691	0.38315	0.964466	0.542862	0.0471618	0.933169	0.0732516	0.387185
UniRef100_O35955	Psmb10	0.721661	0.21796	0.968274	0.211663	0.139588	0.527471	-0.0996071	0.388415
UniRef100_E9QAW0	Zfp213	0.989955	0.649708	0.242523	0.598786	0.261611	0.273382	0.0633393	0.389685
UniRef100_Q3MIA8	Gps1	0.929771	0.731882	0.254345	0.69331	0.167741	0.605254	-0.0493724	0.389705
UniRef100_O88967	Yme1l1	0.838506	0.753789	0.501422	0.528202	0.926637	0.077129	-0.0900425	0.389962
UniRef100_Q64253	Ly6e	0.00872497	0.170572	0.0249399	0.486218	0.478486	0.0480138	-0.347234	0.390006
UniRef100_P48455	Ppp3cc	0.927996	0.256526	0.139307	0.617079	0.431756	0.14782	-0.116544	0.390478
UniRef100_O08796	Eef2k	0.365443	0.484586	0.0949466	0.649089	0.0018752	0.0106478	0.185114	0.391295
UniRef100_P41155	Ltb	0.0461856	0.449708	0.183082	0.81109	0.416664	0.00385742	-0.247206	0.391605
UniRef100_Q3UH66	Wnk2	0.895473	0.0428711	0.550686	0.582658	0.845655	0.475502	-0.0522693	0.391904
UniRef100_P42677	Rps27	0.997775	0.218031	0.179808	0.637751	0.109049	0.930577	0.0711023	0.392244
UniRef100_A2MZG6	Cd247	0.688317	0.444861	0.117598	0.158772	0.803131	0.412648	-0.185228	0.392624
UniRef100_Q3U6T2	Naga	0.627391	0.302838	0.703649	0.818814	0.71812	0.486715	0.0374372	0.393434
UniRef100_O54781	Srpk2	0.796104	0.426155	0.00188078	0.624754	0.0465204	0.286527	-0.359846	0.393771
UniRef100_P15105	Glul	0.745156	0.771	0.164804	0.696514	0.378845	0.29156	-0.0754682	0.394239
UniRef100_Q08943	Ssrp1	0.120636	0.586774	0.90293	0.784503	0.214614	0.283377	-0.0786913	0.394383
UniRef100_Q9WTR2	Map3k6	0.708485	0.706791	0.39884	0.673305	0.698926	0.00873523	0.0794178	0.39499
UniRef100_B1ASL3	Tnfrsf4	0.114964	0.945868	0.75056	0.426476	0.0536619	0.311956	0.106732	0.395058
UniRef100_P97784	Cry1	0.00976576	0.0476533	0.28248	0.989397	0.0378588	0.591305	-0.526367	0.395322
UniRef100_O35623	Bet1	0.894056	0.934249	0.73659	0.607685	0.906669	0.627644	0.0478341	0.395688
UniRef100_A2AUM0	Eif2ak4	0.952647	0.181701	0.171062	0.782371	0.871013	0.567878	-0.0902857	0.396265
UniRef100_Q99LI9	Clp1	0.240291	0.747502	0.465238	0.497495	0.789568	0.734287	-0.0454483	0.397384
UniRef100_P20612	Gnat1	0.358443	0.639168	0.346859	0.590205	0.738823	0.592908	0.0323728	0.39741
UniRef100_Q3V1J8	Habp2	0.589276	0.564795	0.229986	0.410126	0.130074	0.891943	-0.0856267	0.397492
UniRef100_Q9Z2C4	Mtmr1	0.562254	0.130896	0.0917401	0.277367	0.00894492	0.473831	0.163222	0.39765
UniRef100_P55066	Ncan	0.20583	0.580503	0.55434	0.177307	0.040521	0.959851	-0.108129	0.39808
UniRef100_P29037	Tbp	0.805774	0.959954	0.0378007	0.870183	0.756676	0.421842	-0.123129	0.398555
UniRef100_O08602	Raet1a	0.711956	0.131259	0.948619	0.201479	0.601036	0.252875	-0.0822065	0.398715
UniRef100_Q7TPD0	Ints3	0.330446	0.423911	0.351391	0.164572	0.72166	0.589379	-0.101024	0.39907
UniRef100_Q5SX39	Myh4	0.0774022	0.304808	0.957864	0.534444	0.474656	0.339982	0.154497	0.399116
UniRef100_Q91W36	Usp3	0.731563	0.732498	0.374916	0.923125	0.458325	0.719014	-0.0341495	0.399119
UniRef100_P70168	Kpnb1	0.375027	0.616373	0.486462	0.84871	0.751946	0.253839	-0.0426852	0.400697
UniRef100_Q8BFW0	Dkk2	0.920429	0.107897	0.45067	0.872175	0.0578258	0.0500589	0.126732	0.400712
UniRef100_P97370	Atp1b3	0.989036	0.400399	0.0470661	0.740564	0.758534	0.811716	-0.101247	0.401036
UniRef100_O35137	Alx4	0.310714	0.545471	0.795239	0.67543	0.159594	0.525486	-0.0640165	0.401049
UniRef100_Q9Z0L4	Bmp15	0.485732	0.0575167	0.615211	0.65392	0.326499	0.251153	-0.0888474	0.401565
UniRef100_Q9Z0F0	B3galt4	0.483775	0.854543	0.24311	0.938068	0.336011	0.331316	0.0854679	0.402343
UniRef100_Q8VDR7	Tgds	0.893252	0.688341	0.650557	0.489799	0.520595	0.898469	0.0282273	0.402466
UniRef100_Q9CPU0	Glo1	0.515563	0.320085	0.423141	0.891059	0.255187	0.734812	0.0412586	0.40263
UniRef100_O35929	Rem1	0.0815505	0.402476	0.522247	0.679284	0.495082	0.737007	0.151104	0.402814
UniRef100_P52503	Ndufs6	0.345712	0.583671	0.242289	0.648149	4.44e-05	0.299119	0.108209	0.402919
UniRef100_P13516	Scd1	0.187253	0.226927	0.360336	0.0437732	0.0229086	0.0642644	-0.299793	0.402984
UniRef100_O35385	Ppef2	0.0485435	0.598203	0.474972	0.888667	0.223961	0.0730285	0.181051	0.403036
UniRef100_P29788	Vtn	0.704871	0.354979	0.638657	0.782659	0.245728	0.970886	-0.0403964	0.403286
UniRef100_O88856	Tpst2	0.380872	0.194219	0.0922908	0.636409	0.726166	0.359458	-0.0838944	0.403341
UniRef100_Q91W61	Fbxl15	0.486866	0.365742	0.180004	0.864207	0.0816668	0.0270167	0.120906	0.403414
UniRef100_Q9Z282	Gpr132	0.388726	0.387719	0.586725	0.218508	0.938185	0.0197928	0.0628189	0.403554
[truncated: 1,619 more rows]
